# Supplementary material for: Unlocking the Potential of Human-Induced Pluripotent Stem Cells: Cellular Responses and Secretome Profiles in Peptide Hydrogel 3D Culture
Source: MDPI journal article supplement (doi:10.3390/cells13020143), 2024-01-12
Supplement: s1 [file s1]

Supplementary Table S2. Proteins profile of 3D hiPSCs cultured in E8 medium

| Accession  | Peptide count | Unique peptides | Confidence score | Anova (p) | q Value  | Max fold change | Power  | Highest mean condition | Lowest mean condition | Mass     | Description                                                                                               |
|------------|---------------|-----------------|------------------|-----------|----------|-----------------|--------|------------------------|-----------------------|----------|-----------------------------------------------------------------------------------------------------------|
| P02787;H7  | 87            | 73              | 1422.1987        | 6.58E-10  | 7.30E-09 | 5.36132         | 1      | E8 blank               | P-0.3PG-E8            | 79345.08 | Serotransferrin OS=Homo sapiens OX=9606 GN=TF PE=1 SV=3                                                   |
| P02790;Q9  | 26            | 22              | 374.1824         | 9.49E-09  | 4.54E-08 | 4.34388         | 1      | E8 blank               | P-0.3PG-E8            | 52417.79 | Hemopexin OS=Homo sapiens OX=9606 GN=HPX PE=1 SV=2                                                        |
| P78332;E9  | 18            | 16              | 86.9278          | 0.0022038 | 0.00247  | 1.27687         | 0.992  | E8 blank               | P-0.3PG-E8            | 129271.4 | RNA-binding protein 6 OS=Homo sapiens OX=9606 GN=RBM6 PE=1 SV=5                                           |
| O60258     | 20            | 14              | 109.1145         | 5.36E-13  | 1.72E-10 | 38.4221         | 1      | P-0.3PG-E8             | E8 blank              | 25176.57 | Fibroblast growth factor 17 OS=Homo sapiens OX=9606 GN=FGF17 PE=1 SV=1                                    |
| A0A7I2V4I5 | 15            | 14              | 84.2184          | 1.90E-06  | 3.30E-06 | 2.44488         | 1      | F-0.3PG-E8             | E8 blank              | 197391   | Zinc finger CCCH domain-containing protein 13 OS=Homo sapiens OX=9606 GN=ZC3H13 PE=1 SV=1                 |
| Q5THK1;C9  | 16            | 13              | 95.7559          | 0.0001964 | 0.000244 | 1.29476         | 1      | E8 blank               | P-0.3PG-E8            | 241291.9 | Protein PRR14L OS=Homo sapiens OX=9606 GN=PRR14L PE=1 SV=1                                                |
| A0A1B0GVI  | 13            | 13              | 114.1188         | 9.72E-07  | 1.83E-06 | 1.8369          | 1      | E8 blank               | F-0.3PG-E8            | 63574.34 | Keratin_ type I cytoskeletal 10 OS=Homo sapiens OX=9606 GN=KRT10 PE=1 SV=2                                |
| B7ZKJ8;Q14 | 14            | 13              | 162.8706         | 5.72E-08  | 1.80E-07 | 6.59355         | 1      | E8 blank               | P-0.3PG-E8            | 104109.3 | ITIH4 protein OS=Homo sapiens OX=9606 GN=ITIH4 PE=1 SV=1                                                  |
| Q9H792;H0  | 14            | 12              | 83.6328          | 0.0100731 | 0.010888 | 1.14383         | 0.8958 | P-0.3PG-E8             | F-0.3PG-E8            | 195159.7 | Inactive tyrosine-protein kinase PEAK1 OS=Homo sapiens OX=9606 GN=PEAK1 PE=1 SV=4                         |
| P04264;A0  | 17            | 12              | 161.5225         | 3.23E-08  | 1.12E-07 | 3.09591         | 1      | E8 blank               | P-0.3PG-E8            | 66209.9  | Keratin_ type II cytoskeletal 1 OS=Homo sapiens OX=9606 GN=KRT1 PE=1 SV=6                                 |
| Q9H9B1;A0  | 15            | 11              | 91.9865          | 1.83E-09  | 1.48E-08 | 7.86546         | 1      | E8 blank               | P-0.3PG-E8            | 144089.8 | Histone-lysine N-methyltransferase EHMT1 OS=Homo sapiens OX=9606 GN=EHMT1 PE=1 SV=4                       |
| Q5TCS8;J3K | 15            | 11              | 105.056          | 6.17E-09  | 3.47E-08 | 5.50706         | 1      | P-0.3PG-E8             | E8 blank              | 222838.6 | Adenylate kinase 9 OS=Homo sapiens OX=9606 GN=AK9 PE=1 SV=2                                               |
| A8MYJ1;A0  | 10            | 10              | 50.4005          | 7.72E-11  | 1.90E-09 | 14.721          | 1      | P-0.3PG-E8             | E8 blank              | 163153.1 | A-kinase anchor protein 13 OS=Homo sapiens OX=9606 GN=AKAP13 PE=1 SV=3                                    |
| A0A0C4DH0  | 13            | 10              | 73.0751          | 1.28E-07  | 3.34E-07 | 1.79947         | 1      | P-0.3PG-E8             | E8 blank              | 178352.8 | Latent-transforming growth factor beta-binding protein 4 OS=Homo sapiens OX=9606 GN=LTBP4 PE=1 SV=1       |
| A0A669KB7  | 13            | 10              | 74.981           | 6.27E-07  | 1.25E-06 | 3.23651         | 1      | E8 blank               | P-0.3PG-E8            | 217419.6 | Microtubule-associated protein OS=Homo sapiens OX=9606 GN=MAP2 PE=1 SV=1                                  |
| Q92608;E5  | 11            | 10              | 58.9666          | 1.41E-08  | 6.11E-08 | 8.27711         | 1      | F-0.3PG-E8             | E8 blank              | 213260.4 | Dedicator of cytokinesis protein 2 OS=Homo sapiens OX=9606 GN=DOCK2 PE=1 SV=2                             |
| P02768;A0  | 14            | 10              | 151.7058         | 2.31E-10  | 4.00E-09 | 150.855         | 1      | P-0.3PG-E8             | E8 blank              | 71362.71 | Albumin OS=Homo sapiens OX=9606 GN=ALB PE=1 SV=2                                                          |
| E9PMT2;F8  | 13            | 10              | 78.3685          | 0.4356509 | 0.437014 | 1.02738         | 0.1496 | E8 blank               | P-0.3PG-E8            | 160934.8 | LIM domain only protein 7 OS=Homo sapiens OX=9606 GN=LMO7 PE=1 SV=1                                       |
| Q86U86;E7  | 11            | 9               | 69.2947          | 7.09E-09  | 3.82E-08 | 36.9035         | 1      | F-0.3PG-E8             | E8 blank              | 194202.8 | Protein polybromo-1 OS=Homo sapiens OX=9606 GN=PBRM1 PE=1 SV=1                                            |
| Q6UB98     | 9             | 9               | 59.0844          | 5.22E-06  | 8.26E-06 | 1.5821          | 1      | F-0.3PG-E8             | P-0.3PG-E8            | 237191.6 | Ankyrin repeat domain-containing protein 12 OS=Homo sapiens OX=9606 GN=ANKRD12 PE=1 SV=3                  |
| P20849     | 10            | 9               | 58.2893          | 1.70E-09  | 1.43E-08 | 4.73469         | 1      | E8 blank               | P-0.3PG-E8            | 92496.69 | Collagen alpha-1(IX) chain OS=Homo sapiens OX=9606 GN=COL9A1 PE=1 SV=3                                    |
| P31946     | 11            | 8               | 87.1214          | 8.19E-08  | 2.41E-07 | 5.91279         | 1      | P-0.3PG-E8             | E8 blank              | 28196.51 | 14-3-3 protein beta/alpha OS=Homo sapiens OX=9606 GN=YWHAB PE=1 SV=3                                      |
| P58397     | 8             | 8               | 47.2367          | 9.19E-06  | 1.38E-05 | 1.66909         | 1      | E8 blank               | P-0.3PG-E8            | 182637.2 | A disintegrin and metalloproteinase with thrombospondin motifs 12 OS=Homo sapiens OX=9606 GN=ADAMTS       |
| O75095     | 10            | 8               | 49.85            | 2.33E-06  | 3.99E-06 | 1.99133         | 1      | F-0.3PG-E8             | E8 blank              | 174871.9 | Multiple epidermal growth factor-like domains protein 6 OS=Homo sapiens OX=9606 GN=MEGF6 PE=1 SV=4        |
| Q9NS15;H0  | 10            | 8               | 47.3732          | 6.69E-09  | 3.64E-08 | 16.1213         | 1      | P-0.3PG-E8             | E8 blank              | 146545   | Latent-transforming growth factor beta-binding protein 3 OS=Homo sapiens OX=9606 GN=LTBP3 PE=1 SV=4       |
| A0A1B0GTV  | 7             | 7               | 35.0462          | 0.0532901 | 0.055453 | 1.08969         | 0.577  | F-0.3PG-E8             | P-0.3PG-E8            | 141126.2 | Tight junction protein ZO-2 OS=Homo sapiens OX=9606 GN=TJP2 PE=1 SV=1                                     |
| A0A2R8Y3N  | 8             | 7               | 42.6113          | 2.20E-08  | 8.51E-08 | 3.21985         | 1      | E8 blank               | P-0.3PG-E8            | 74234.3  | Uncharacterized protein OS=Homo sapiens OX=9606 PE=4 SV=1                                                 |
| A0A5F9ZHN  | 7             | 7               | 41.0762          | 0.0104666 | 0.011295 | 1.24938         | 0.891  | P-0.3PG-E8             | F-0.3PG-E8            | 129653.9 | Tyrosine-protein kinase OS=Homo sapiens OX=9606 GN=JAK1 PE=1 SV=1                                         |
| Q6P280     | 7             | 7               | 31.0335          | 3.79E-06  | 6.22E-06 | 2.32047         | 1      | F-0.3PG-E8             | E8 blank              | 67518.42 | Zinc finger protein 529 OS=Homo sapiens OX=9606 GN=ZNF529 PE=1 SV=2                                       |
| P01106     | 9             | 7               | 75.8264          | 0.0011157 | 0.001296 | 1.58573         | 0.9986 | F-0.3PG-E8             | E8 blank              | 51135.39 | Myc proto-oncogene protein OS=Homo sapiens OX=9606 GN=MYC PE=1 SV=2                                       |
| A0A669KB1  | 10            | 7               | 71.3639          | 0.0002503 | 0.000308 | 1.72084         | 1      | E8 blank               | F-0.3PG-E8            | 211323.5 | Golgi-specific brefeldin A-resistance guanine nucleotide exchange factor 1 OS=Homo sapiens OX=9606 GN=GBI |
| Q99795     | 11            | 7               | 67.4585          | 9.26E-09  | 4.46E-08 | 17.9631         | 1      | P-0.3PG-E8             | E8 blank              | 36259.29 | Cell surface A33 antigen OS=Homo sapiens OX=9606 GN=GPA33 PE=1 SV=1                                       |
| P05787     | 10            | 7               | 69.4078          | 1.44E-05  | 2.12E-05 | 1.28496         | 1      | E8 blank               | P-0.3PG-E8            | 53704.36 | Keratin_ type II cytoskeletal 8 OS=Homo sapiens OX=9606 GN=KRT8 PE=1 SV=7                                 |
| Q9NQ90;F5  | 6             | 6               | 29.467           | 0.0001229 | 0.000158 | 1.50849         | 1      | P-0.3PG-E8             | E8 blank              | 114768   | Anoctamin-2 OS=Homo sapiens OX=9606 GN=ANO2 PE=1 SV=2                                                     |
| A0A2R8Y59  | 6             | 6               | 40.55            | 9.07E-06  | 1.37E-05 | 7.17463         | 1      | P-0.3PG-E8             | E8 blank              | 247036.9 | A-kinase anchor protein 9 OS=Homo sapiens OX=9606 GN=AKAP9 PE=1 SV=2                                      |
| P04004     | 7             | 6               | 38.931           | 5.85E-05  | 7.84E-05 | 3.18685         | 1      | E8 blank               | P-0.3PG-E8            | 55104.04 | Vitronectin OS=Homo sapiens OX=9606 GN=VTN PE=1 SV=1                                                      |
| F5H101;Q7  | 6             | 6               | 30.6068          | 0.0059521 | 0.0065   | 1.16347         | 0.9488 | F-0.3PG-E8             | E8 blank              | 122506   | Nucleolar protein 8 OS=Homo sapiens OX=9606 GN=NOL8 PE=1 SV=1                                             |
| A1Z1Q3;A0  | 6             | 6               | 28.4155          | 1.87E-05  | 2.69E-05 | 1.54658         | 1      | F-0.3PG-E8             | E8 blank              | 47934.56 | ADP-ribose glycohydrolase MACROD2 OS=Homo sapiens OX=9606 GN=MACROD2 PE=1 SV=2                            |
| A0A5F9ZGY  | 6             | 6               | 23.7794          | 0.152977  | 0.156144 | 1.14382         | 0.3375 | P-0.3PG-E8             | E8 blank              | 208918.8 | Ankyrin-2 OS=Homo sapiens OX=9606 GN=ANK2 PE=1 SV=1                                                       |
| Q4LE39;X6  | 6             | 6               | 31.7588          | 0.0022484 | 0.002511 | 1.33897         | 0.9916 | E8 blank               | F-0.3PG-E8            | 148893.2 | AT-rich interactive domain-containing protein 4B OS=Homo sapiens OX=9606 GN=ARID4B PE=1 SV=2              |
| A0A669KA3  | 7             | 6               | 36.5929          | 1.06E-07  | 2.97E-07 | 2.14824         | 1      | E8 blank               | F-0.3PG-E8            | 221297.4 | Proprotein convertase subtilisin/kexin type 5 OS=Homo sapiens OX=9606 GN=PCSK5 PE=1 SV=1                  |
| Q8WYB5;A0  | 7             | 6               | 43.0101          | 2.79E-08  | 1.02E-07 | 2.27531         | 1      | P-0.3PG-E8             | E8 blank              | 234286.9 | Histone acetyltransferase KAT6B OS=Homo sapiens OX=9606 GN=KAT6B PE=1 SV=3                                |
| G3XAE9;Q9  | 6             | 6               | 36.5987          | 1.28E-08  | 5.68E-08 | 5.81109         | 1      | P-0.3PG-E8             | E8 blank              | 196689.1 | KIAA0423_ isoform CRA_a OS=Homo sapiens OX=9606 GN=TOGARAM1 PE=1 SV=1                                     |
| Q9P227     | 7             | 6               | 40.9496          | 1.92E-08  | 7.60E-08 | 4.10188         | 1      | E8 blank               | P-0.3PG-E8            | 163446.7 | Rho GTPase-activating protein 23 OS=Homo sapiens OX=9606 GN=ARHGAP23 PE=1 SV=2                            |
| A0A3F2YNX  | 9             | 6               | 40.6019          | 5.85E-10  | 7.17E-09 | 9.13102         | 1      | P-0.3PG-E8             | E8 blank              | 227963.8 | Histone acetyltransferase OS=Homo sapiens OX=9606 GN=KAT6A PE=1 SV=1                                      |

|            |    |   |          |           |          |         |        |             |             |          |                                                                                                               |
|------------|----|---|----------|-----------|----------|---------|--------|-------------|-------------|----------|---------------------------------------------------------------------------------------------------------------|
| A0A7P0T9K  | 8  | 6 | 37.3366  | 2.72E-08  | 9.97E-08 | 3.86461 | 1      | F-0.3PG-E8- | E8 blank    | 184446.1 | Inactive ubiquitin carboxyl-terminal hydrolase 54 OS=Homo sapiens OX=9606 GN=USP54 PE=4 SV=1                  |
| P09038;A0  | 18 | 6 | 144.2762 | 5.77E-08  | 1.80E-07 | 3.952   | 1      | E8 blank    | P-0.3PG-E8- | 31112.17 | Fibroblast growth factor 2 OS=Homo sapiens OX=9606 GN=FGF2 PE=1 SV=3                                          |
| P49736;F8V | 8  | 6 | 56.1122  | 1.72E-11  | 8.49E-10 | 47.1231 | 1      | P-0.3PG-E8- | E8 blank    | 102580.6 | DNA replication licensing factor MCM2 OS=Homo sapiens OX=9606 GN=MCM2 PE=1 SV=4                               |
| P17020;E9F | 6  | 6 | 58.3896  | 6.53E-09  | 3.58E-08 | 4.49531 | 1      | P-0.3PG-E8- | E8 blank    | 78866.82 | Zinc finger protein 16 OS=Homo sapiens OX=9606 GN=ZNF16 PE=1 SV=3                                             |
| Q5JQC9;A0  | 6  | 5 | 30.3502  | 4.98E-06  | 7.96E-06 | 4.20835 | 1      | P-0.3PG-E8- | E8 blank    | 95903.07 | A-kinase anchor protein 4 OS=Homo sapiens OX=9606 GN=AKAP4 PE=1 SV=1                                          |
| E9PC84;F5H | 6  | 5 | 27.7672  | 6.68E-05  | 8.88E-05 | 1.69162 | 1      | P-0.3PG-E8- | E8 blank    | 216499.6 | Tenascin OS=Homo sapiens OX=9606 GN=TNC PE=1 SV=1                                                             |
| Q86UP2;G3  | 6  | 5 | 28.4095  | 8.77E-08  | 2.56E-07 | 6.77535 | 1      | P-0.3PG-E8- | E8 blank    | 156560.6 | Kinectin OS=Homo sapiens OX=9606 GN=KTN1 PE=1 SV=1                                                            |
| Q9UHC6     | 5  | 5 | 33.2009  | 9.89E-10  | 9.75E-09 | 7.80911 | 1      | F-0.3PG-E8- | E8 blank    | 150277.3 | Contactin-associated protein-like 2 OS=Homo sapiens OX=9606 GN=CNTNAP2 PE=1 SV=1                              |
| A0A6Q8PFF  | 5  | 5 | 23.0745  | 3.56E-08  | 1.22E-07 | 4.15244 | 1      | E8 blank    | P-0.3PG-E8- | 162649.2 | IQ motif and SEC7 domain-containing protein 2 OS=Homo sapiens OX=9606 GN=IQSEC2 PE=1 SV=1                     |
| O60237     | 6  | 5 | 42.6444  | 2.76E-09  | 1.88E-08 | 3.56356 | 1      | E8 blank    | P-0.3PG-E8- | 110860.2 | Protein phosphatase 1 regulatory subunit 12B OS=Homo sapiens OX=9606 GN=PPP1R12B PE=1 SV=2                    |
| A0A2R8YDF  | 5  | 5 | 37.0484  | 2.71E-05  | 3.80E-05 | 2.05612 | 1      | E8 blank    | P-0.3PG-E8- | 222800.3 | Sodium channel protein OS=Homo sapiens OX=9606 GN=SCN9A PE=1 SV=1                                             |
| Q96SK3;K7  | 5  | 5 | 36.371   | 3.51E-06  | 5.82E-06 | 1.99907 | 1      | E8 blank    | P-0.3PG-E8- | 83129.89 | Zinc finger protein 607 OS=Homo sapiens OX=9606 GN=ZNF607 PE=1 SV=3                                           |
| G3V5V3;O6  | 6  | 5 | 34.6632  | 6.09E-08  | 1.89E-07 | 2.82492 | 1      | E8 blank    | P-0.3PG-E8- | 114348.4 | Nuclear export mediator factor NEMF (Fragment) OS=Homo sapiens OX=9606 GN=NEMF PE=1 SV=8                      |
| Q9UK13     | 5  | 5 | 25.6942  | 2.50E-09  | 1.76E-08 | 6.12429 | 1      | P-0.3PG-E8- | E8 blank    | 73648.79 | Zinc finger protein 221 OS=Homo sapiens OX=9606 GN=ZNF221 PE=1 SV=4                                           |
| Q9Y3B9     | 5  | 5 | 34.4242  | 1.79E-07  | 4.36E-07 | 2.53043 | 1      | E8 blank    | P-0.3PG-E8- | 31655.35 | RRP15-like protein OS=Homo sapiens OX=9606 GN=RRP15 PE=1 SV=2                                                 |
| E9PKP7;P1  | 5  | 5 | 22.3428  | 0.0001789 | 0.000224 | 1.33165 | 1      | F-0.3PG-E8- | E8 blank    | 87778.82 | Nucleolar transcription factor 1 OS=Homo sapiens OX=9606 GN=UBTF PE=1 SV=1                                    |
| Q14966;A0  | 6  | 5 | 35.0695  | 4.61E-07  | 9.52E-07 | 1.99265 | 1      | E8 blank    | P-0.3PG-E8- | 222050.8 | Zinc finger protein 638 OS=Homo sapiens OX=9606 GN=ZNF638 PE=1 SV=2                                           |
| A0A0G2JNC  | 5  | 5 | 40.1665  | 1.68E-08  | 6.97E-08 | 6.53207 | 1      | P-0.3PG-E8- | E8 blank    | 143300.1 | Baculoviral IAP repeat-containing protein 1 OS=Homo sapiens OX=9606 GN=NAIP PE=1 SV=1                         |
| Q05707;A0  | 5  | 5 | 28.5012  | 2.25E-07  | 5.32E-07 | 2.90888 | 1      | P-0.3PG-E8- | E8 blank    | 194599.3 | Collagen alpha-1(XIV) chain OS=Homo sapiens OX=9606 GN=COL14A1 PE=1 SV=3                                      |
| P29317     | 6  | 5 | 30.6203  | 1.89E-08  | 7.53E-08 | 6.67414 | 1      | E8 blank    | P-0.3PG-E8- | 109749.3 | Ephrin type-A receptor 2 OS=Homo sapiens OX=9606 GN=EPHA2 PE=1 SV=2                                           |
| A0A0G2JMJ  | 6  | 5 | 37.2432  | 5.59E-10  | 7.17E-09 | 4.85029 | 1      | E8 blank    | P-0.3PG-E8- | 81143.03 | Microtubule-associated protein OS=Homo sapiens OX=9606 GN=MAPT PE=1 SV=1                                      |
| P82970     | 8  | 5 | 50.4829  | 0.0020605 | 0.002325 | 1.35374 | 0.9931 | E8 blank    | P-0.3PG-E8- | 31524.64 | High mobility group nucleosome-binding domain-containing protein 5 OS=Homo sapiens OX=9606 GN=HMGN5 PE=1 SV=1 |
| P57071;E7F | 7  | 5 | 39.6635  | 1.61E-05  | 2.34E-05 | 3.58902 | 1      | E8 blank    | F-0.3PG-E8- | 172234.6 | PR domain zinc finger protein 15 OS=Homo sapiens OX=9606 GN=PRDM15 PE=1 SV=4                                  |
| O14647;A0  | 7  | 5 | 42.9259  | 2.97E-05  | 4.14E-05 | 1.80886 | 1      | P-0.3PG-E8- | E8 blank    | 212313.2 | Chromodomain-helicase-DNA-binding protein 2 OS=Homo sapiens OX=9606 GN=CHD2 PE=1 SV=2                         |
| Q96JN2;C9  | 7  | 5 | 41.6648  | 4.39E-07  | 9.22E-07 | 16.8904 | 1      | P-0.3PG-E8- | E8 blank    | 135699.3 | Coiled-coil domain-containing protein 136 OS=Homo sapiens OX=9606 GN=CCDC136 PE=1 SV=3                        |
| Q6P0N0     | 7  | 5 | 34.4364  | 6.11E-10  | 7.17E-09 | 34.1311 | 1      | P-0.3PG-E8- | E8 blank    | 129998.1 | Mis18-binding protein 1 OS=Homo sapiens OX=9606 GN=MIS18BP1 PE=1 SV=1                                         |
| A0A0C4DGI  | 6  | 5 | 35.2677  | 6.77E-10  | 7.35E-09 | 51.388  | 1      | P-0.3PG-E8- | E8 blank    | 171235.7 | THO complex subunit 2 OS=Homo sapiens OX=9606 GN=THOC2 PE=1 SV=1                                              |
| P55075     | 6  | 5 | 37.9705  | 9.25E-10  | 9.41E-09 | 15.0334 | 1      | P-0.3PG-E8- | E8 blank    | 26753.63 | Fibroblast growth factor 8 OS=Homo sapiens OX=9606 GN=FGF8 PE=1 SV=1                                          |
| O43320     | 7  | 5 | 48.4407  | 0.0262169 | 0.027869 | 1.44843 | 0.7349 | E8 blank    | F-0.3PG-E8- | 23872.9  | Fibroblast growth factor 16 OS=Homo sapiens OX=9606 GN=FGF16 PE=1 SV=1                                        |
| A0A1B0GV4  | 6  | 5 | 44.8002  | 1.21E-09  | 1.12E-08 | 6.50277 | 1      | P-0.3PG-E8- | E8 blank    | 186021.3 | Kinesin-like protein KIF21A (Fragment) OS=Homo sapiens OX=9606 GN=KIF21A PE=1 SV=1                            |
| A0A3B3IRU  | 8  | 5 | 42.4465  | 9.93E-08  | 2.84E-07 | 3.40406 | 1      | P-0.3PG-E8- | E8 blank    | 164828.7 | Paternally-expressed gene 3 protein OS=Homo sapiens OX=9606 GN=PEG3 PE=1 SV=1                                 |
| Q9ULD6     | 6  | 5 | 31.7338  | 1.39E-10  | 2.97E-09 | 8.43794 | 1      | P-0.3PG-E8- | E8 blank    | 106788.9 | Protein inturned OS=Homo sapiens OX=9606 GN=INTU PE=1 SV=2                                                    |
| P38398;A0  | 6  | 5 | 32.3447  | 0.0682498 | 0.070561 | 1.47307 | 0.5191 | F-0.3PG-E8- | P-0.3PG-E8- | 210230.3 | Breast cancer type 1 susceptibility protein OS=Homo sapiens OX=9606 GN=BRCA1 PE=1 SV=2                        |
| Q92922     | 4  | 4 | 20.2251  | 7.80E-09  | 4.08E-08 | 37.2275 | 1      | P-0.3PG-E8- | E8 blank    | 123380.5 | SWI/SNF complex subunit SMARCC1 OS=Homo sapiens OX=9606 GN=SMARCC1 PE=1 SV=3                                  |
| Q5TF58;H0  | 4  | 4 | 22.1492  | 0.0006393 | 0.000755 | 1.28924 | 0.9998 | P-0.3PG-E8- | E8 blank    | 57841.48 | Intermediate filament family orphan 2 OS=Homo sapiens OX=9606 GN=IFFO2 PE=2 SV=3                              |
| E7EWD6;Q   | 4  | 4 | 23.0424  | 1.12E-08  | 5.15E-08 | 2.81885 | 1      | P-0.3PG-E8- | E8 blank    | 151777.8 | Putative Polycomb group protein ASXL2 OS=Homo sapiens OX=9606 GN=ASXL2 PE=1 SV=1                              |
| A0A0G2JMJ  | 4  | 4 | 24.0884  | 9.33E-07  | 1.77E-06 | 6.65894 | 1      | E8 blank    | P-0.3PG-E8- | 114004.6 | NACHT_ LRR and PYD domains-containing protein 7 OS=Homo sapiens OX=9606 GN=NLRP7 PE=1 SV=1                    |
| Q8NEN0;A0  | 4  | 4 | 25.5146  | 7.50E-08  | 2.25E-07 | 5.5282  | 1      | P-0.3PG-E8- | E8 blank    | 98121.32 | Armadillo repeat-containing protein 2 OS=Homo sapiens OX=9606 GN=ARMC2 PE=2 SV=4                              |
| E7ESJ3;Q9U | 4  | 4 | 28.5721  | 3.49E-07  | 7.55E-07 | 11.3971 | 1      | F-0.3PG-E8- | E8 blank    | 197521.5 | Ankyrin repeat domain-containing protein 26 OS=Homo sapiens OX=9606 GN=ANKRD26 PE=1 SV=2                      |
| A0A7P0TAK  | 4  | 4 | 28.9779  | 0.0002471 | 0.000305 | 1.79126 | 1      | P-0.3PG-E8- | E8 blank    | 168046.8 | WD repeat-containing protein 62 OS=Homo sapiens OX=9606 GN=WDR62 PE=4 SV=1                                    |
| B7ZB24;F5H | 4  | 4 | 27.9577  | 2.97E-11  | 1.19E-09 | 37.7153 | 1      | P-0.3PG-E8- | E8 blank    | 99158.65 | Multiple PDZ domain protein OS=Homo sapiens OX=9606 GN=MPDZ PE=1 SV=1                                         |
| A0A0U1RRH  | 4  | 4 | 25.4903  | 5.48E-08  | 1.73E-07 | 4.57896 | 1      | P-0.3PG-E8- | E8 blank    | 109153.3 | PHD finger protein 14 OS=Homo sapiens OX=9606 GN=PHF14 PE=1 SV=1                                              |
| Q12888;A6  | 4  | 4 | 20.3501  | 3.47E-05  | 4.77E-05 | 2.28032 | 1      | E8 blank    | F-0.3PG-E8- | 215627.7 | TP53-binding protein 1 OS=Homo sapiens OX=9606 GN=TP53BP1 PE=1 SV=2                                           |
| A0A0A0MR   | 4  | 4 | 24.2111  | 2.94E-06  | 4.92E-06 | 2.85917 | 1      | E8 blank    | F-0.3PG-E8- | 93097.78 | Fibroblast growth factor receptor OS=Homo sapiens OX=9606 GN=FGFR2 PE=1 SV=1                                  |
| Q5QPR3;Q9  | 4  | 4 | 21.1665  | 1.61E-06  | 2.84E-06 | 2.63446 | 1      | E8 blank    | F-0.3PG-E8- | 91292.48 | Cyclin-dependent kinase 11A OS=Homo sapiens OX=9606 GN=CDK11A PE=1 SV=1                                       |
| F8VU39;J3K | 4  | 4 | 31.8438  | 7.31E-07  | 1.43E-06 | 4.01017 | 1      | P-0.3PG-E8- | E8 blank    | 212876.5 | Bromodomain adjacent to zinc finger domain protein 2A OS=Homo sapiens OX=9606 GN=BAZ2A PE=1 SV=1              |
| A0A2R8Y59  | 4  | 4 | 20.5675  | 6.81E-08  | 2.09E-07 | 33.9667 | 1      | P-0.3PG-E8- | E8 blank    | 74596.79 | Transcriptional repressor CTCF OS=Homo sapiens OX=9606 GN=CTCF PE=1 SV=1                                      |
| Q2PPJ7;H7  | 4  | 4 | 19.5453  | 0.0003976 | 0.000478 | 4.03431 | 1      | P-0.3PG-E8- | E8 blank    | 213222.4 | Ral GTPase-activating protein subunit alpha-2 OS=Homo sapiens OX=9606 GN=RALGAPA2 PE=1 SV=2                   |
| F8VZ81;Q9  | 4  | 4 | 20.2266  | 1.66E-07  | 4.06E-07 | 5.96078 | 1      | P-0.3PG-E8- | E8 blank    | 72506.03 | TBC1 domain family member 30 OS=Homo sapiens OX=9606 GN=TBC1D30 PE=1 SV=1                                     |
| A0A096LNL  | 4  | 4 | 25.1983  | 7.35E-07  | 1.44E-06 | 12.6545 | 1      | E8 blank    | P-0.3PG-E8- | 153317.2 | DNA helicase (Fragment) OS=Homo sapiens OX=9606 GN=ATRX PE=1 SV=1                                             |



|            |   |   |         |           |          |         |        |             |             |          |                                                                                                         |
|------------|---|---|---------|-----------|----------|---------|--------|-------------|-------------|----------|---------------------------------------------------------------------------------------------------------|
| H0Y6W5;Q   | 4 | 4 | 24.5103 | 1.91E-09  | 1.53E-08 | 8.34763 | 1      | E8 blank    | P-0.3PG-E8- | 97604.6  | Zinc finger protein basonuclin-2 (Fragment) OS=Homo sapiens OX=9606 GN=BNC2 PE=1 SV=1                   |
| A0A0A0MS   | 4 | 4 | 39.2386 | 2.67E-06  | 4.54E-06 | 6.80195 | 1      | P-0.3PG-E8- | E8 blank    | 34654.11 | Protein PRRC2C OS=Homo sapiens OX=9606 GN=PRRC2C PE=1 SV=1                                              |
| Q5VTB9;Q5  | 5 | 4 | 31.3872 | 8.26E-09  | 4.17E-08 | 3.38    | 1      | E8 blank    | P-0.3PG-E8- | 63791.87 | E3 ubiquitin-protein ligase RNF220 OS=Homo sapiens OX=9606 GN=RNF220 PE=1 SV=1                          |
| Q86XL3     | 4 | 4 | 16.6868 | 4.81E-11  | 1.40E-09 | 59.6352 | 1      | P-0.3PG-E8- | E8 blank    | 104969.9 | Ankyrin repeat and LEM domain-containing protein 2 OS=Homo sapiens OX=9606 GN=ANKLE2 PE=1 SV=4          |
| Q8TEY7     | 4 | 4 | 18.086  | 1.15E-06  | 2.09E-06 | 7.66899 | 1      | E8 blank    | P-0.3PG-E8- | 108608.9 | Ubiquitin carboxyl-terminal hydrolase 33 OS=Homo sapiens OX=9606 GN=USP33 PE=1 SV=2                     |
| A0A024R4E  | 5 | 4 | 25.4739 | 2.70E-07  | 6.19E-07 | 2.01422 | 1      | P-0.3PG-E8- | E8 blank    | 142067.1 | High density lipoprotein binding protein (Vigilin)_ isoform CRA_a OS=Homo sapiens OX=9606 GN=HDLBP PE=1 |
| O00267;M0  | 4 | 4 | 18.5695 | 2.77E-05  | 3.88E-05 | 3.0968  | 1      | F-0.3PG-E8- | E8 blank    | 121399   | Transcription elongation factor SPT5 OS=Homo sapiens OX=9606 GN=SUPT5H PE=1 SV=1                        |
| O75197     | 6 | 4 | 31.5155 | 1.41E-07  | 3.58E-07 | 4.22321 | 1      | E8 blank    | P-0.3PG-E8- | 182395.4 | Low-density lipoprotein receptor-related protein 5 OS=Homo sapiens OX=9606 GN=LRP5 PE=1 SV=2            |
| H0YJG4;A0  | 6 | 4 | 46.5485 | 3.95E-07  | 8.40E-07 | 1.64345 | 1      | P-0.3PG-E8- | E8 blank    | 209392.2 | Chromodomain-helicase-DNA-binding protein 8 (Fragment) OS=Homo sapiens OX=9606 GN=CHD8 PE=1 SV=2        |
| P52756;C9J | 6 | 4 | 33.4805 | 1.66E-07  | 4.06E-07 | 17.5586 | 1      | P-0.3PG-E8- | E8 blank    | 92667.22 | RNA-binding protein 5 OS=Homo sapiens OX=9606 GN=RBM5 PE=1 SV=2                                         |
| Q13045;J3H | 4 | 4 | 23.3184 | 1.18E-08  | 5.34E-08 | 14.0449 | 1      | P-0.3PG-E8- | E8 blank    | 146234.1 | Protein flightless-1 homolog OS=Homo sapiens OX=9606 GN=FLII PE=1 SV=2                                  |
| Q86VI1;F5H | 4 | 4 | 21.4182 | 2.22E-07  | 5.26E-07 | 4.01888 | 1      | P-0.3PG-E8- | E8 blank    | 82247.92 | Exocyst complex component 3-like protein OS=Homo sapiens OX=9606 GN=EXOC3L1 PE=1 SV=2                   |
| E9PMZ8;Q8  | 3 | 3 | 12.0999 | 3.32E-07  | 7.30E-07 | 6.3432  | 1      | F-0.3PG-E8- | E8 blank    | 154238.2 | T-lymphoma invasion and metastasis-inducing protein 2 (Fragment) OS=Homo sapiens OX=9606 GN=TIAM2 PE=1  |
| J3QLK5;Q86 | 3 | 3 | 21.9625 | 1.80E-08  | 7.27E-08 | 17.7416 | 1      | P-0.3PG-E8- | E8 blank    | 70029.16 | Serine/threonine-protein kinase tousled-like 2 OS=Homo sapiens OX=9606 GN=TLK2 PE=1 SV=1                |
| Q12789     | 3 | 3 | 13.784  | 2.23E-06  | 3.82E-06 | 2.33759 | 1      | P-0.3PG-E8- | E8 blank    | 241213.3 | General transcription factor 3C polypeptide 1 OS=Homo sapiens OX=9606 GN=GTF3C1 PE=1 SV=4               |
| Q9C0A0;A0  | 3 | 3 | 16.3692 | 4.24E-08  | 1.39E-07 | 23.2366 | 1      | F-0.3PG-E8- | E8 blank    | 147270.5 | Contactin-associated protein-like 4 OS=Homo sapiens OX=9606 GN=CNTNAP4 PE=1 SV=3                        |
| P02452     | 3 | 3 | 20.7725 | 3.22E-09  | 2.15E-08 | 4.40029 | 1      | F-0.3PG-E8- | E8 blank    | 139968.1 | Collagen alpha-1(I) chain OS=Homo sapiens OX=9606 GN=COL1A1 PE=1 SV=5                                   |
| A0A087X1Z  | 3 | 3 | 13.7718 | 1.71E-09  | 1.43E-08 | 13.1342 | 1      | P-0.3PG-E8- | E8 blank    | 119503.9 | Gamma-tubulin complex component OS=Homo sapiens OX=9606 GN=TUBGCP5 PE=1 SV=1                            |
| Q96T23     | 3 | 3 | 12.7961 | 1.25E-11  | 8.49E-10 | 27.6232 | 1      | P-0.3PG-E8- | E8 blank    | 165360.4 | Remodeling and spacing factor 1 OS=Homo sapiens OX=9606 GN=RSF1 PE=1 SV=2                               |
| Q96GC6;M0  | 3 | 3 | 15.9727 | 2.37E-09  | 1.70E-08 | 14.9836 | 1      | P-0.3PG-E8- | E8 blank    | 75318.05 | Neurotrophin receptor-interacting factor homolog OS=Homo sapiens OX=9606 GN=ZNF274 PE=1 SV=2            |
| A0A3B3IT2  | 3 | 3 | 17.5933 | 1.20E-07  | 3.21E-07 | 8.66218 | 1      | P-0.3PG-E8- | E8 blank    | 194567.3 | Kinesin-like protein KIF1A OS=Homo sapiens OX=9606 GN=KIF1A PE=1 SV=1                                   |
| A0A1W2PC   | 4 | 3 | 33.8061 | 2.82E-06  | 4.76E-06 | 1.39282 | 1      | F-0.3PG-E8- | E8 blank    | 86006.34 | Sodium channel protein type 8 subunit alpha OS=Homo sapiens OX=9606 GN=SCN8A PE=1 SV=1                  |
| A0A590UJ5  | 3 | 3 | 29.0614 | 4.90E-07  | 1.00E-06 | 2.32318 | 1      | F-0.3PG-E8- | E8 blank    | 101496   | Low-density lipoprotein receptor-related protein 8 OS=Homo sapiens OX=9606 GN=LRP8 PE=1 SV=1            |
| Q8TBY8     | 3 | 3 | 18.1792 | 8.47E-09  | 4.24E-08 | 4.41322 | 1      | E8 blank    | P-0.3PG-E8- | 119033.8 | Polyamine-modulated factor 1-binding protein 1 OS=Homo sapiens OX=9606 GN=PMFBP1 PE=2 SV=3              |
| A0A3B3ITZ  | 3 | 3 | 23.1247 | 1.76E-12  | 2.30E-10 | 22.118  | 1      | P-0.3PG-E8- | E8 blank    | 161873.6 | DBF4-type zinc finger-containing protein 2 (Fragment) OS=Homo sapiens OX=9606 GN=ZDBF2 PE=1 SV=1        |
| C9KOV9;Q9  | 3 | 3 | 23.1462 | 3.33E-12  | 2.91E-10 | 21.3577 | 1      | F-0.3PG-E8- | E8 blank    | 78816.97 | Ataxin-7-like protein 1 (Fragment) OS=Homo sapiens OX=9606 GN=ATXN7L1 PE=1 SV=1                         |
| Q9UGU0;A0  | 3 | 3 | 13.938  | 4.32E-06  | 7.02E-06 | 1.64177 | 1      | E8 blank    | P-0.3PG-E8- | 213254.1 | Transcription factor 20 OS=Homo sapiens OX=9606 GN=TCF20 PE=1 SV=3                                      |
| H3BPJ7;A0  | 3 | 3 | 22.119  | 3.68E-07  | 7.91E-07 | 48.2106 | 1      | E8 blank    | P-0.3PG-E8- | 68711.24 | Transcription factor 4 OS=Homo sapiens OX=9606 GN=TCF4 PE=1 SV=1                                        |
| A0A2R8Y5U  | 4 | 3 | 20.258  | 3.58E-05  | 4.91E-05 | 66.9705 | 1      | P-0.3PG-E8- | E8 blank    | 160789.8 | Polycomb group protein ASXL1 OS=Homo sapiens OX=9606 GN=ASXL1 PE=1 SV=1                                 |
| H3BRA9;Q8  | 3 | 3 | 13.5376 | 1.50E-05  | 2.21E-05 | 2.05323 | 1      | P-0.3PG-E8- | E8 blank    | 127809.3 | A disintegrin and metalloproteinase with thrombospondin motifs 17 OS=Homo sapiens OX=9606 GN=ADAMTS     |
| H0YBJ4;O0  | 3 | 3 | 13.1715 | 3.25E-05  | 4.50E-05 | 1.78012 | 1      | E8 blank    | P-0.3PG-E8- | 83822.32 | Matrilin-2 (Fragment) OS=Homo sapiens OX=9606 GN=MATN2 PE=1 SV=1                                        |
| P55198     | 3 | 3 | 13.61   | 5.84E-07  | 1.17E-06 | 2.6019  | 1      | E8 blank    | F-0.3PG-E8- | 113530.8 | Protein AF-17 OS=Homo sapiens OX=9606 GN=MLLT6 PE=1 SV=3                                                |
| Q96LW1     | 3 | 3 | 13.1195 | 0.0052255 | 0.005735 | 1.2963  | 0.9581 | E8 blank    | P-0.3PG-E8- | 72411.33 | Zinc finger protein 354B OS=Homo sapiens OX=9606 GN=ZNF354B PE=1 SV=1                                   |
| K7EIE6;Q6V | 4 | 3 | 24.9546 | 0.0019546 | 0.002221 | 1.21866 | 0.9939 | P-0.3PG-E8- | E8 blank    | 49746.54 | Zinc finger protein 562 OS=Homo sapiens OX=9606 GN=ZNF562 PE=1 SV=1                                     |
| O95838;J3L | 3 | 3 | 18.3981 | 3.10E-05  | 4.30E-05 | 2.13195 | 1      | P-0.3PG-E8- | E8 blank    | 63913.98 | Glucagon-like peptide 2 receptor OS=Homo sapiens OX=9606 GN=GLP2R PE=2 SV=1                             |
| O94892     | 3 | 3 | 16.9641 | 1.61E-06  | 2.84E-06 | 5.17913 | 1      | P-0.3PG-E8- | E8 blank    | 76889.32 | Zinc finger protein 432 OS=Homo sapiens OX=9606 GN=ZNF432 PE=1 SV=1                                     |
| A0A0A0MR   | 3 | 3 | 12.5632 | 5.39E-06  | 8.51E-06 | 20.759  | 1      | E8 blank    | F-0.3PG-E8- | 177866.5 | MAP kinase-activating death domain protein OS=Homo sapiens OX=9606 GN=MADD PE=1 SV=1                    |
| Q9Y2H1     | 3 | 3 | 20.3606 | 0.0001895 | 0.000236 | 1.40025 | 1      | E8 blank    | P-0.3PG-E8- | 54231.08 | Serine/threonine-protein kinase 38-like OS=Homo sapiens OX=9606 GN=STK38L PE=1 SV=3                     |
| Q9P0W8;G   | 3 | 3 | 17.1253 | 0.0610884 | 0.06326  | 1.12342 | 0.545  | E8 blank    | F-0.3PG-E8- | 68232.42 | Spermatogenesis-associated protein 7 OS=Homo sapiens OX=9606 GN=SPATA7 PE=1 SV=3                        |
| Q9P266     | 3 | 3 | 22.5941 | 1.27E-05  | 1.88E-05 | 1.98441 | 1      | F-0.3PG-E8- | E8 blank    | 149434.5 | Junctional protein associated with coronary artery disease OS=Homo sapiens OX=9606 GN=JCAD PE=1 SV=3    |
| A0A087WV   | 3 | 3 | 21.4863 | 0.0022362 | 0.002502 | 1.2301  | 0.9917 | P-0.3PG-E8- | E8 blank    | 157011.2 | Rho GTPase-activating protein 21 OS=Homo sapiens OX=9606 GN=ARHGAP21 PE=1 SV=1                          |
| Q9NUL3;E7  | 3 | 3 | 13.9606 | 4.44E-07  | 9.29E-07 | 4.39015 | 1      | E8 blank    | P-0.3PG-E8- | 62836.7  | Double-stranded RNA-binding protein Staufen homolog 2 OS=Homo sapiens OX=9606 GN=STAU2 PE=1 SV=2        |
| O96028     | 3 | 3 | 12.8457 | 3.21E-08  | 1.12E-07 | 3.54463 | 1      | E8 blank    | F-0.3PG-E8- | 156307.4 | Histone-lysine N-methyltransferase NSD2 OS=Homo sapiens OX=9606 GN=NSD2 PE=1 SV=1                       |
| Q8NCN4;H0  | 3 | 3 | 14.1412 | 4.98E-08  | 1.60E-07 | 7.584   | 1      | P-0.3PG-E8- | E8 blank    | 78277.92 | E3 ubiquitin-protein ligase RNF169 OS=Homo sapiens OX=9606 GN=RNF169 PE=1 SV=2                          |
| A0A7P0T84  | 3 | 3 | 16.7342 | 0.0011574 | 0.001337 | 1.48036 | 0.9985 | E8 blank    | F-0.3PG-E8- | 43353.94 | A-kinase anchor protein 8-like OS=Homo sapiens OX=9606 GN=AKAP8L PE=4 SV=1                              |
| A0A7P0T96  | 3 | 3 | 15.4126 | 1.04E-09  | 1.01E-08 | 5.87514 | 1      | E8 blank    | F-0.3PG-E8- | 190782.8 | Androglobin OS=Homo sapiens OX=9606 GN=ADGB PE=4 SV=1                                                   |
| P08575     | 3 | 3 | 25.123  | 7.01E-08  | 2.14E-07 | 4.84743 | 1      | F-0.3PG-E8- | E8 blank    | 148969.4 | Receptor-type tyrosine-protein phosphatase C OS=Homo sapiens OX=9606 GN=PTPRC PE=1 SV=3                 |
| Q8NDX5     | 3 | 3 | 11.7731 | 0.001137  | 0.001318 | 1.34128 | 0.9986 | E8 blank    | F-0.3PG-E8- | 106960.1 | Polyhomeotic-like protein 3 OS=Homo sapiens OX=9606 GN=PHC3 PE=1 SV=1                                   |
| Q9UPX8;A0  | 3 | 3 | 15.4213 | 1.08E-08  | 5.00E-08 | 6.42954 | 1      | P-0.3PG-E8- | E8 blank    | 159335.5 | SH3 and multiple ankyrin repeat domains protein 2 OS=Homo sapiens OX=9606 GN=SHANK2 PE=1 SV=3           |
| A0A5F9ZHE  | 3 | 3 | 17.7328 | 3.73E-08  | 1.26E-07 | 4.68944 | 1      | E8 blank    | P-0.3PG-E8- | 54538.96 | DNA primase OS=Homo sapiens OX=9606 GN=PRIM1 PE=1 SV=1                                                  |

|            |    |   |          |           |          |         |        |             |             |          |                                                                                                          |
|------------|----|---|----------|-----------|----------|---------|--------|-------------|-------------|----------|----------------------------------------------------------------------------------------------------------|
| Q96DT7     | 3  | 3 | 14.7745  | 2.00E-06  | 3.46E-06 | 3.50416 | 1      | E8 blank    | P-0.3PG-E8- | 96034.69 | Zinc finger and BTB domain-containing protein 10 OS=Homo sapiens OX=9606 GN=ZBTB10 PE=1 SV=2             |
| A0A087WV   | 3  | 3 | 16.1059  | 1.63E-10  | 3.26E-09 | 36.6912 | 1      | P-0.3PG-E8- | E8 blank    | 122371.3 | DNA mismatch repair protein Msh6 OS=Homo sapiens OX=9606 GN=MSH6 PE=1 SV=1                               |
| Q13796;C9  | 3  | 3 | 15.1353  | 9.98E-09  | 4.74E-08 | 4.35946 | 1      | P-0.3PG-E8- | E8 blank    | 177607.9 | Protein Shroom2 OS=Homo sapiens OX=9606 GN=SHROOM2 PE=1 SV=1                                             |
| D6RJB7;Q8  | 3  | 3 | 20.7416  | 3.14E-07  | 7.04E-07 | 2.72931 | 1      | F-0.3PG-E8- | E8 blank    | 219731.4 | Ankyrin repeat domain-containing protein 31 OS=Homo sapiens OX=9606 GN=ANKRD31 PE=4 SV=2                 |
| A0A3B3ISZ  | 3  | 3 | 17.5358  | 0.0012164 | 0.0014   | 1.20119 | 0.9983 | F-0.3PG-E8- | E8 blank    | 117888.5 | Signal peptide_ CUB and EGF-like domain-containing protein 2 OS=Homo sapiens OX=9606 GN=SCUBE2 PE=1 SV=1 |
| A8KOR7;H0  | 3  | 3 | 14.9987  | 6.37E-09  | 3.52E-08 | 8.67004 | 1      | E8 blank    | F-0.3PG-E8- | 88624.16 | Zinc finger protein 839 OS=Homo sapiens OX=9606 GN=ZNF839 PE=2 SV=1                                      |
| Q96MT3;A0  | 3  | 3 | 18.0848  | 1.35E-06  | 2.43E-06 | 2.15941 | 1      | P-0.3PG-E8- | E8 blank    | 96239.34 | Prickle-like protein 1 OS=Homo sapiens OX=9606 GN=PRICKLE1 PE=1 SV=2                                     |
| E7EPI0;Q9F | 3  | 3 | 19.979   | 2.92E-05  | 4.08E-05 | 2.38371 | 1      | F-0.3PG-E8- | E8 blank    | 150955.3 | Inhibitor of Bruton tyrosine kinase OS=Homo sapiens OX=9606 GN=IBTK PE=1 SV=1                            |
| Q15650;H0  | 3  | 3 | 15.9491  | 0.000184  | 0.00023  | 1.47532 | 1      | F-0.3PG-E8- | E8 blank    | 67001.71 | Activating signal cointegrator 1 OS=Homo sapiens OX=9606 GN=TRIP4 PE=1 SV=4                              |
| H0Y9M2;A0  | 3  | 3 | 12.8826  | 3.00E-08  | 1.06E-07 | 9.40646 | 1      | P-0.3PG-E8- | E8 blank    | 151736.3 | Zinc finger protein 827 OS=Homo sapiens OX=9606 GN=ZNF827 PE=1 SV=2                                      |
| Q8NFAQ8    | 3  | 3 | 17.3897  | 1.67E-08  | 6.96E-08 | 3.64999 | 1      | P-0.3PG-E8- | E8 blank    | 51491.5  | Torsin-1A-interacting protein 2 OS=Homo sapiens OX=9606 GN=TOR1AIP2 PE=1 SV=1                            |
| A0A1W2PP   | 3  | 3 | 21.8789  | 0.000174  | 0.000218 | 1.31787 | 1      | F-0.3PG-E8- | E8 blank    | 42108.2  | Choline O-acetyltransferase OS=Homo sapiens OX=9606 GN=CHAT PE=1 SV=1                                    |
| A0A0D9SFR  | 3  | 3 | 25.0572  | 4.72E-06  | 7.57E-06 | 4.75548 | 1      | E8 blank    | P-0.3PG-E8- | 116091.4 | Diacylglycerol kinase OS=Homo sapiens OX=9606 GN=DGKH PE=1 SV=1                                          |
| Q99590;A0  | 3  | 3 | 12.6149  | 4.43E-11  | 1.40E-09 | 5.76396 | 1      | P-0.3PG-E8- | E8 blank    | 166420.3 | Protein SCAF11 OS=Homo sapiens OX=9606 GN=SCAF11 PE=1 SV=2                                               |
| H0Y2P0;P1  | 3  | 3 | 24.5025  | 2.66E-06  | 4.54E-06 | 1.8942  | 1      | P-0.3PG-E8- | E8 blank    | 31351.34 | CD44 antigen (Fragment) OS=Homo sapiens OX=9606 GN=CD44 PE=1 SV=1                                        |
| A0A1W2PP   | 3  | 3 | 21.3149  | 0.0004534 | 0.000542 | 1.25396 | 0.9999 | F-0.3PG-E8- | P-0.3PG-E8- | 36745.7  | Lipoyl synthase (Fragment) OS=Homo sapiens OX=9606 GN=LIAS PE=1 SV=1                                     |
| Q86XN6     | 3  | 3 | 15.657   | 1.13E-06  | 2.07E-06 | 2.28358 | 1      | E8 blank    | P-0.3PG-E8- | 90681.6  | Zinc finger protein 761 OS=Homo sapiens OX=9606 GN=ZNF761 PE=1 SV=3                                      |
| A0A0A0MS   | 3  | 3 | 15.6338  | 2.63E-08  | 9.79E-08 | 8.43989 | 1      | E8 blank    | F-0.3PG-E8- | 83145.8  | Exocyst complex component 5 OS=Homo sapiens OX=9606 GN=EXOC5 PE=1 SV=1                                   |
| H0Y626     | 3  | 3 | 22.0838  | 0.0042656 | 0.00469  | 1.61031 | 0.9701 | E8 blank    | P-0.3PG-E8- | 109740   | Uncharacterized protein OS=Homo sapiens OX=9606 PE=4 SV=2                                                |
| G5E9X3;Q9  | 3  | 3 | 15.2529  | 1.75E-08  | 7.14E-08 | 2.43697 | 1      | P-0.3PG-E8- | E8 blank    | 75401.82 | Fibronectin type III domain containing 3A_ isoform CRA_f OS=Homo sapiens OX=9606 GN=FNDC3A PE=1 SV=1     |
| Q8IZC7     | 3  | 3 | 15.6954  | 1.72E-07  | 4.20E-07 | 2.77937 | 1      | P-0.3PG-E8- | E8 blank    | 51936.22 | Zinc finger protein 101 OS=Homo sapiens OX=9606 GN=ZNF101 PE=1 SV=1                                      |
| D9ZGF5     | 14 | 3 | 100.9078 | 0.003464  | 0.003822 | 1.24899 | 0.9795 | E8 blank    | P-0.3PG-E8- | 17481.95 | Fibroblast growth factor OS=Homo sapiens OX=9606 GN=FGF2 PE=3 SV=1                                       |
| Q15068;H7  | 4  | 3 | 27.2519  | 1.46E-09  | 1.30E-08 | 10.1802 | 1      | E8 blank    | P-0.3PG-E8- | 129420.9 | Guanine nucleotide exchange factor DBS OS=Homo sapiens OX=9606 GN=MCF2L PE=1 SV=2                        |
| E5RJ97;Q9U | 4  | 3 | 19.265   | 7.26E-06  | 1.11E-05 | 2.45731 | 1      | P-0.3PG-E8- | E8 blank    | 100766   | Zinc finger transcription factor Trps1 OS=Homo sapiens OX=9606 GN=TRPS1 PE=1 SV=1                        |
| Q9P2N2     | 5  | 3 | 32.9428  | 2.37E-09  | 1.70E-08 | 21.352  | 1      | P-0.3PG-E8- | E8 blank    | 82458.97 | Rho GTPase-activating protein 28 OS=Homo sapiens OX=9606 GN=ARHGAP28 PE=1 SV=3                           |
| Q14530;B8  | 4  | 3 | 19.8523  | 0.0026156 | 0.002911 | 1.15559 | 0.9883 | F-0.3PG-E8- | E8 blank    | 26705.16 | Thioredoxin domain-containing protein 9 OS=Homo sapiens OX=9606 GN=TXNDC9 PE=1 SV=2                      |
| Q03181     | 4  | 3 | 21.2721  | 1.97E-07  | 4.74E-07 | 2.09096 | 1      | P-0.3PG-E8- | E8 blank    | 50701.91 | Peroxisome proliferator-activated receptor delta OS=Homo sapiens OX=9606 GN=PPARD PE=1 SV=1              |
| O60486;B4  | 5  | 3 | 33.5264  | 3.82E-07  | 8.16E-07 | 2.90786 | 1      | F-0.3PG-E8- | E8 blank    | 178536.6 | Plexin-C1 OS=Homo sapiens OX=9606 GN=PLXNC1 PE=1 SV=1                                                    |
| Q14839;A0  | 17 | 3 | 86.5254  | 1.05E-06  | 1.95E-06 | 12.8388 | 1      | P-0.3PG-E8- | E8 blank    | 219544.7 | Chromodomain-helicase-DNA-binding protein 4 OS=Homo sapiens OX=9606 GN=CHD4 PE=1 SV=2                    |
| Q5F1R6;A0  | 4  | 3 | 14.4205  | 8.29E-11  | 1.97E-09 | 13.8828 | 1      | P-0.3PG-E8- | E8 blank    | 62484.21 | DnaJ homolog subfamily C member 21 OS=Homo sapiens OX=9606 GN=DNAJC21 PE=1 SV=2                          |
| E9PDF6;O4  | 5  | 3 | 33.3174  | 1.18E-08  | 5.34E-08 | 12.7745 | 1      | P-0.3PG-E8- | E8 blank    | 129507.6 | Unconventional myosin-Ib OS=Homo sapiens OX=9606 GN=MYO1B PE=1 SV=1                                      |
| A8MXP9;A0  | 5  | 3 | 34.9778  | 2.76E-07  | 6.28E-07 | 3.14203 | 1      | P-0.3PG-E8- | E8 blank    | 100480.6 | Matrin-3 OS=Homo sapiens OX=9606 GN=MATR3 PE=1 SV=1                                                      |
| Q96SE7;M0  | 5  | 3 | 25.2089  | 4.42E-06  | 7.15E-06 | 1.71342 | 1      | E8 blank    | P-0.3PG-E8- | 98279.65 | Zinc finger protein 347 OS=Homo sapiens OX=9606 GN=ZNF347 PE=1 SV=2                                      |
| A0A0U1RR   | 5  | 3 | 22.6808  | 3.72E-08  | 1.26E-07 | 21.2176 | 1      | F-0.3PG-E8- | E8 blank    | 217446.6 | C-myc promoter-binding protein OS=Homo sapiens OX=9606 GN=DENND4A PE=1 SV=2                              |
| A0A0A0MS   | 5  | 3 | 32.4775  | 3.25E-08  | 1.12E-07 | 2.25385 | 1      | E8 blank    | P-0.3PG-E8- | 44539.24 | Immunoglobulin heavy constant gamma 1 (Fragment) OS=Homo sapiens OX=9606 GN=IGHG1 PE=1 SV=1              |
| P35527;K7  | 4  | 3 | 28.1927  | 2.53E-05  | 3.58E-05 | 1.86175 | 1      | E8 blank    | F-0.3PG-E8- | 62292.54 | Keratin_type I cytoskeletal 9 OS=Homo sapiens OX=9606 GN=KRT9 PE=1 SV=3                                  |
| Q562F6     | 5  | 3 | 28.3273  | 5.01E-06  | 7.99E-06 | 2.22473 | 1      | E8 blank    | P-0.3PG-E8- | 145879.9 | Shugoshin 2 OS=Homo sapiens OX=9606 GN=SGO2 PE=1 SV=2                                                    |
| Q63HK3     | 4  | 3 | 19.4159  | 5.44E-09  | 3.18E-08 | 4.5674  | 1      | E8 blank    | P-0.3PG-E8- | 112822.5 | Zinc finger protein with KRAB and SCAN domains 2 OS=Homo sapiens OX=9606 GN=ZKSCAN2 PE=1 SV=2            |
| Q12906;K7  | 5  | 3 | 36.3122  | 7.68E-06  | 1.17E-05 | 1.78577 | 1      | E8 blank    | P-0.3PG-E8- | 95737.75 | Interleukin enhancer-binding factor 3 OS=Homo sapiens OX=9606 GN=ILF3 PE=1 SV=3                          |
| Q06455     | 4  | 3 | 26.9281  | 2.64E-08  | 9.79E-08 | 4.59939 | 1      | E8 blank    | P-0.3PG-E8- | 68364.94 | Protein CBFA2T1 OS=Homo sapiens OX=9606 GN=RUNX1T1 PE=1 SV=2                                             |
| Q9NZV7     | 5  | 3 | 27.5122  | 2.38E-07  | 5.57E-07 | 4.43003 | 1      | E8 blank    | P-0.3PG-E8- | 62304.42 | Zinc finger imprinted 2 OS=Homo sapiens OX=9606 GN=ZIM2 PE=1 SV=1                                        |
| Q9Y4D1;G3  | 5  | 3 | 23.736   | 1.84E-08  | 7.36E-08 | 9.41606 | 1      | P-0.3PG-E8- | E8 blank    | 124044   | Disheveled-associated activator of morphogenesis 1 OS=Homo sapiens OX=9606 GN=DAAM1 PE=1 SV=2            |
| Q13123     | 5  | 3 | 23.4436  | 0.0080315 | 0.008711 | 1.26315 | 0.9217 | E8 blank    | P-0.3PG-E8- | 65716.43 | Protein Red OS=Homo sapiens OX=9606 GN=IK PE=1 SV=3                                                      |
| Q6DN90;A0  | 5  | 3 | 29.2776  | 0.001034  | 0.001205 | 1.36363 | 0.9989 | E8 blank    | P-0.3PG-E8- | 109170   | IQ motif and SEC7 domain-containing protein 1 OS=Homo sapiens OX=9606 GN=IQSEC1 PE=1 SV=1                |
| P01308;A6  | 4  | 3 | 45.195   | 1.36E-06  | 2.43E-06 | 4.66937 | 1      | E8 blank    | P-0.3PG-E8- | 12323.09 | Insulin OS=Homo sapiens OX=9606 GN=INS PE=1 SV=1                                                         |
| Q8IWE4     | 4  | 3 | 19.8702  | 1.78E-09  | 1.46E-08 | 4.78183 | 1      | E8 blank    | P-0.3PG-E8- | 34861.65 | DCN1-like protein 3 OS=Homo sapiens OX=9606 GN=DCUN1D3 PE=1 SV=1                                         |
| Q9P219;G3  | 4  | 3 | 26.8344  | 8.26E-05  | 0.000108 | 1.69374 | 1      | E8 blank    | P-0.3PG-E8- | 229371.1 | Protein Daple OS=Homo sapiens OX=9606 GN=CCDC88C PE=1 SV=3                                               |
| Q01826;C9  | 5  | 3 | 25.8655  | 2.18E-09  | 1.62E-08 | 3.74032 | 1      | F-0.3PG-E8- | E8 blank    | 86299.32 | DNA-binding protein SATB1 OS=Homo sapiens OX=9606 GN=SATB1 PE=1 SV=1                                     |
| P13796;Q5  | 5  | 3 | 25.736   | 6.69E-06  | 1.04E-05 | 2.28042 | 1      | F-0.3PG-E8- | E8 blank    | 70858.8  | Plastin-2 OS=Homo sapiens OX=9606 GN=LCP1 PE=1 SV=6                                                      |
| Q8N141     | 4  | 3 | 20.4461  | 0.015288  | 0.016305 | 1.22943 | 0.8354 | F-0.3PG-E8- | P-0.3PG-E8- | 64231.86 | Zinc finger protein 82 homolog OS=Homo sapiens OX=9606 GN=ZFP82 PE=1 SV=1                                |



|            |   |   |         |           |          |         |        |              |              |          |                                                                                                         |
|------------|---|---|---------|-----------|----------|---------|--------|--------------|--------------|----------|---------------------------------------------------------------------------------------------------------|
| Q9H7D0;H0  | 4 | 3 | 24.5463 | 0.0537386 | 0.055829 | 1.08589 | 0.575  | F-0.3PG-E8-3 | P-0.3PG-E8-3 | 216335.6 | Dedicator of cytokinesis protein 5 OS=Homo sapiens OX=9606 GN=DOCK5 PE=1 SV=3                           |
| Q9BRK4;B1  | 4 | 3 | 20.0098 | 5.75E-05  | 7.76E-05 | 19.0961 | 1      | E8 blank     | F-0.3PG-E8-3 | 73443.78 | Leucine zipper putative tumor suppressor 2 OS=Homo sapiens OX=9606 GN=LZTS2 PE=1 SV=2                   |
| Q96SN8;A0  | 6 | 3 | 30.4217 | 8.06E-05  | 0.000106 | 1.57689 | 1      | E8 blank     | P-0.3PG-E8-3 | 216577.6 | CDK5 regulatory subunit-associated protein 2 OS=Homo sapiens OX=9606 GN=CDK5RAP2 PE=1 SV=5              |
| A0A1B0GU   | 4 | 3 | 24.3264 | 0.0523182 | 0.05453  | 2.59378 | 0.5812 | P-0.3PG-E8-3 | E8 blank     | 101870.1 | Protein Aster-B OS=Homo sapiens OX=9606 GN=GRAMD1B PE=1 SV=1                                            |
| Q6P158     | 4 | 3 | 14.4069 | 1.84E-05  | 2.66E-05 | 3.23967 | 1      | E8 blank     | P-0.3PG-E8-3 | 157201.3 | Putative ATP-dependent RNA helicase DHX57 OS=Homo sapiens OX=9606 GN=DHX57 PE=1 SV=2                    |
| E7EV71;Q1  | 4 | 3 | 30.0584 | 1.39E-06  | 2.49E-06 | 1.4609  | 1      | F-0.3PG-E8-3 | E8 blank     | 156018.6 | Latent-transforming growth factor beta-binding protein 1 OS=Homo sapiens OX=9606 GN=LTBP1 PE=1 SV=2     |
| A0A0D9SFG  | 4 | 3 | 31.0084 | 0.0606855 | 0.062944 | 1.05403 | 0.5466 | E8 blank     | P-0.3PG-E8-3 | 56049.32 | Zinc finger protein 302 OS=Homo sapiens OX=9606 GN=ZNF302 PE=1 SV=1                                     |
| Q96MT7     | 4 | 3 | 24.1774 | 5.90E-10  | 7.17E-09 | 5.71202 | 1      | P-0.3PG-E8-3 | E8 blank     | 215120.3 | Cilia- and flagella-associated protein 44 OS=Homo sapiens OX=9606 GN=CFAP44 PE=1 SV=2                   |
| B1AHL2;P2  | 4 | 3 | 31.8264 | 3.74E-10  | 5.57E-09 | 3.42567 | 1      | P-0.3PG-E8-3 | E8 blank     | 82492.33 | Fibulin-1 OS=Homo sapiens OX=9606 GN=FBLN1 PE=1 SV=1                                                    |
| Q9P2E3     | 4 | 3 | 20.6487 | 9.90E-05  | 0.000129 | 1.41497 | 1      | E8 blank     | F-0.3PG-E8-3 | 225245.4 | NFX1-type zinc finger-containing protein 1 OS=Homo sapiens OX=9606 GN=ZNFX1 PE=2 SV=2                   |
| Q9GZX5     | 4 | 3 | 27.1022 | 2.11E-09  | 1.59E-08 | 2.84231 | 1      | F-0.3PG-E8-3 | E8 blank     | 61323.05 | Zinc finger protein 350 OS=Homo sapiens OX=9606 GN=ZNF350 PE=1 SV=3                                     |
| G3V200;O7  | 6 | 3 | 30.8615 | 2.12E-08  | 8.30E-08 | 5.38491 | 1      | F-0.3PG-E8-3 | E8 blank     | 142564.7 | Liprin-alpha-2 OS=Homo sapiens OX=9606 GN=PPFIA2 PE=1 SV=2                                              |
| Q13643     | 4 | 3 | 26.3613 | 0.135924  | 0.139181 | 1.11018 | 0.3627 | E8 blank     | F-0.3PG-E8-3 | 33187.95 | Four and a half LIM domains protein 3 OS=Homo sapiens OX=9606 GN=FHL3 PE=1 SV=4                         |
| Q9H8V3;C9  | 4 | 3 | 22.1159 | 4.71E-09  | 2.93E-08 | 6.77096 | 1      | E8 blank     | P-0.3PG-E8-3 | 104531.5 | Protein ECT2 OS=Homo sapiens OX=9606 GN=ECT2 PE=1 SV=4                                                  |
| Q8WVS4;H1  | 4 | 3 | 27.362  | 0.0006301 | 0.000745 | 1.18518 | 0.9998 | P-0.3PG-E8-3 | E8 blank     | 123369.3 | Cytoplasmic dynein 2 intermediate chain 1 OS=Homo sapiens OX=9606 GN=DYNC2I1 PE=1 SV=3                  |
| Q9BXU1     | 2 | 2 | 10.9842 | 0.0151038 | 0.016136 | 1.24083 | 0.8374 | F-0.3PG-E8-3 | E8 blank     | 116720.6 | Serine/threonine-protein kinase 31 OS=Homo sapiens OX=9606 GN=STK31 PE=2 SV=2                           |
| H0YLG5;Q9  | 2 | 2 | 13.3315 | 0.0009315 | 0.001088 | 2.5347  | 0.9992 | F-0.3PG-E8-3 | E8 blank     | 31491.84 | Regulator of microtubule dynamics protein 3 (Fragment) OS=Homo sapiens OX=9606 GN=RMDN3 PE=1 SV=1       |
| F8W7T7;P1  | 2 | 2 | 17.1354 | 7.06E-11  | 1.86E-09 | 78.774  | 1      | P-0.3PG-E8-3 | E8 blank     | 73602.61 | Zinc finger protein 44 OS=Homo sapiens OX=9606 GN=ZNF44 PE=1 SV=1                                       |
| M0R208;Q1  | 2 | 2 | 24.6722 | 2.48E-08  | 9.40E-08 | 14.6986 | 1      | P-0.3PG-E8-3 | E8 blank     | 20682.82 | ATP-dependent Clp protease proteolytic subunit OS=Homo sapiens OX=9606 GN=CLPP PE=1 SV=1                |
| A0A6Q8PFF  | 2 | 2 | 10.185  | 1.59E-09  | 1.39E-08 | 17.0784 | 1      | P-0.3PG-E8-3 | E8 blank     | 98456.44 | Centrosomal protein of 104 kDa OS=Homo sapiens OX=9606 GN=CEP104 PE=1 SV=1                              |
| E9PD25;O4  | 2 | 2 | 20.6955 | 1.10E-07  | 3.06E-07 | 10.8137 | 1      | P-0.3PG-E8-3 | E8 blank     | 119616.9 | Metalloendopeptidase OS=Homo sapiens OX=9606 GN=TLL1 PE=1 SV=1                                          |
| A8MVX0;H1  | 2 | 2 | 15.4439 | 0.0014775 | 0.001691 | 1.52857 | 0.997  | E8 blank     | F-0.3PG-E8-3 | 95374.47 | Rho guanine nucleotide exchange factor 33 OS=Homo sapiens OX=9606 GN=ARHGEF33 PE=2 SV=2                 |
| F5H6W4;Q5  | 2 | 2 | 12.8119 | 6.14E-10  | 7.17E-09 | 19.8353 | 1      | P-0.3PG-E8-3 | E8 blank     | 70750.25 | E3 ubiquitin-protein ligase MARCHF7 OS=Homo sapiens OX=9606 GN=MARCHF7 PE=1 SV=1                        |
| Q7KZ85;J3C | 2 | 2 | 22.4688 | 7.46E-07  | 1.45E-06 | 6.46151 | 1      | P-0.3PG-E8-3 | E8 blank     | 200327.6 | Transcription elongation factor SPT6 OS=Homo sapiens OX=9606 GN=SUPT6H PE=1 SV=2                        |
| Q01581     | 2 | 2 | 13.7286 | 7.50E-05  | 9.91E-05 | 1.5341  | 1      | F-0.3PG-E8-3 | E8 blank     | 57864    | Hydroxymethylglutaryl-CoA synthase_ cytoplasmic OS=Homo sapiens OX=9606 GN=HMGCS1 PE=1 SV=2             |
| Q8NBR6     | 2 | 2 | 10.5553 | 3.15E-10  | 5.05E-09 | 9.20811 | 1      | F-0.3PG-E8-3 | E8 blank     | 67847.65 | Ubiquitin carboxyl-terminal hydrolase MINDY-2 OS=Homo sapiens OX=9606 GN=MINDY2 PE=1 SV=2               |
| C9IZD3;Q68 | 2 | 2 | 21.4518 | 0.0003624 | 0.000438 | 1.56692 | 1      | E8 blank     | F-0.3PG-E8-3 | 24237.23 | Rho GTPase-activating protein 17 (Fragment) OS=Homo sapiens OX=9606 GN=ARHGAP17 PE=1 SV=3               |
| Q969W8     | 2 | 2 | 10.2261 | 3.66E-07  | 7.90E-07 | 23.5566 | 1      | P-0.3PG-E8-3 | E8 blank     | 50416.88 | Zinc finger protein 566 OS=Homo sapiens OX=9606 GN=ZNF566 PE=1 SV=1                                     |
| Q13263;M0  | 2 | 2 | 13.3655 | 1.32E-05  | 1.94E-05 | 1.28862 | 1      | P-0.3PG-E8-3 | F-0.3PG-E8-3 | 90317.64 | Transcription intermediary factor 1-beta OS=Homo sapiens OX=9606 GN=TRIM28 PE=1 SV=5                    |
| A0A087WX   | 2 | 2 | 14.3715 | 3.85E-10  | 5.61E-09 | 11.2217 | 1      | E8 blank     | F-0.3PG-E8-3 | 93393.24 | Zinc finger protein 33B OS=Homo sapiens OX=9606 GN=ZNF33B PE=1 SV=1                                     |
| Q9H116;Q5  | 2 | 2 | 20.0396 | 1.08E-06  | 2.00E-06 | 2.3978  | 1      | F-0.3PG-E8-3 | E8 blank     | 82145.72 | GDNF-inducible zinc finger protein 1 OS=Homo sapiens OX=9606 GN=GZF1 PE=1 SV=1                          |
| Q96CP6;M0  | 2 | 2 | 17.1004 | 3.24E-11  | 1.22E-09 | 56.9635 | 1      | P-0.3PG-E8-3 | E8 blank     | 81364.57 | Protein Aster-A OS=Homo sapiens OX=9606 GN=GRAMD1A PE=1 SV=2                                            |
| F8W6I7;A0  | 2 | 2 | 14.3571 | 5.49E-07  | 1.11E-06 | 3.57819 | 1      | P-0.3PG-E8-3 | E8 blank     | 33269.3  | Helix-destabilizing protein OS=Homo sapiens OX=9606 GN=HNRNPA1 PE=1 SV=2                                |
| P42285;H0  | 2 | 2 | 14.706  | 2.17E-10  | 4.00E-09 | 27.1091 | 1      | P-0.3PG-E8-3 | E8 blank     | 118831.5 | Exosome RNA helicase MTR4 OS=Homo sapiens OX=9606 GN=MTREX PE=1 SV=3                                    |
| H7C1P9     | 2 | 2 | 9.3789  | 0.0017922 | 0.002044 | 3.85419 | 0.9951 | F-0.3PG-E8-3 | E8 blank     | 109291.5 | Titin (Fragment) OS=Homo sapiens OX=9606 GN=TTN PE=1 SV=1                                               |
| A2RRD8;M0  | 2 | 2 | 10.7986 | 1.26E-07  | 3.31E-07 | 1.7631  | 1      | F-0.3PG-E8-3 | E8 blank     | 61151.35 | Zinc finger protein 320 OS=Homo sapiens OX=9606 GN=ZNF320 PE=1 SV=1                                     |
| A0A2R8Y54  | 2 | 2 | 9.9813  | 3.04E-08  | 1.07E-07 | 33.4172 | 1      | P-0.3PG-E8-3 | E8 blank     | 205496.3 | InaD-like protein OS=Homo sapiens OX=9606 GN=PATJ PE=1 SV=1                                             |
| K7ER83     | 2 | 2 | 10.4089 | 1.53E-07  | 3.85E-07 | 3.16062 | 1      | F-0.3PG-E8-3 | E8 blank     | 26715.76 | Protein phosphatase 1 regulatory subunit 12C (Fragment) OS=Homo sapiens OX=9606 GN=PPP1R12C PE=1 SV=3   |
| A0A7I2RN4  | 2 | 2 | 16.7392 | 4.81E-08  | 1.55E-07 | 6.93486 | 1      | P-0.3PG-E8-3 | E8 blank     | 43234.27 | DnaJ homolog subfamily B member 5 OS=Homo sapiens OX=9606 GN=DNAJB5 PE=1 SV=1                           |
| Q5T089;B4  | 2 | 2 | 4.5468  | 0.0003525 | 0.000427 | 2.7702  | 1      | F-0.3PG-E8-3 | E8 blank     | 54306.36 | MORN repeat-containing protein 1 OS=Homo sapiens OX=9606 GN=MORN1 PE=2 SV=2                             |
| Q9ULM2;M0  | 2 | 2 | 11.6242 | 7.18E-06  | 1.10E-05 | 1.91421 | 1      | P-0.3PG-E8-3 | E8 blank     | 63393.39 | Zinc finger protein 490 OS=Homo sapiens OX=9606 GN=ZNF490 PE=1 SV=2                                     |
| A0A087X0Z  | 2 | 2 | 10.5327 | 0.0142459 | 0.01527  | 1.34339 | 0.8468 | F-0.3PG-E8-3 | E8 blank     | 14261.99 | Rho GTPase-activating protein 23 (Fragment) OS=Homo sapiens OX=9606 GN=ARHGAP23 PE=1 SV=1               |
| A0A087WX   | 2 | 2 | 15.0718 | 3.79E-06  | 6.22E-06 | 4.97759 | 1      | P-0.3PG-E8-3 | E8 blank     | 54736.48 | Clathrin heavy chain 2 OS=Homo sapiens OX=9606 GN=CLTCL1 PE=1 SV=1                                      |
| Q9H6S0;D6  | 2 | 2 | 9.3041  | 0.0002479 | 0.000306 | 1.79663 | 1      | E8 blank     | P-0.3PG-E8-3 | 161674.4 | 3'-5' RNA helicase YTHDC2 OS=Homo sapiens OX=9606 GN=YTHDC2 PE=1 SV=2                                   |
| Q9UDR5     | 2 | 2 | 20.3906 | 4.21E-11  | 1.40E-09 | 19.1753 | 1      | P-0.3PG-E8-3 | E8 blank     | 102873.4 | Alpha-aminoacidic semialdehyde synthase_ mitochondrial OS=Homo sapiens OX=9606 GN=AASS PE=1 SV=1        |
| Q92630;A0  | 2 | 2 | 17.8686 | 1.56E-05  | 2.27E-05 | 5.37199 | 1      | F-0.3PG-E8-3 | E8 blank     | 67165.01 | Dual specificity tyrosine-phosphorylation-regulated kinase 2 OS=Homo sapiens OX=9606 GN=DYRK2 PE=1 SV=3 |
| Q95219     | 2 | 2 | 16.2882 | 0.0003478 | 0.000422 | 10.3533 | 1      | E8 blank     | F-0.3PG-E8-3 | 52194.06 | Sorting nexin-4 OS=Homo sapiens OX=9606 GN=SNX4 PE=1 SV=1                                               |
| Q96JB5;J3K | 2 | 2 | 11.4853 | 4.83E-09  | 2.93E-08 | 217.072 | 1      | P-0.3PG-E8-3 | E8 blank     | 57262.93 | CDK5 regulatory subunit-associated protein 3 OS=Homo sapiens OX=9606 GN=CDK5RAP3 PE=1 SV=2              |
| Q13751     | 2 | 2 | 12.698  | 1.09E-06  | 2.01E-06 | 1.69173 | 1      | E8 blank     | P-0.3PG-E8-3 | 133450.6 | Laminin subunit beta-3 OS=Homo sapiens OX=9606 GN=LAMB3 PE=1 SV=1                                       |
| Q53F19;K7  | 2 | 2 | 9.6443  | 3.57E-05  | 4.90E-05 | 1.60281 | 1      | F-0.3PG-E8-3 | E8 blank     | 70706.72 | Nuclear cap-binding protein subunit 3 OS=Homo sapiens OX=9606 GN=NCBP3 PE=1 SV=2                        |

|            |   |   |         |           |          |          |        |             |             |          |                                                                                                             |
|------------|---|---|---------|-----------|----------|----------|--------|-------------|-------------|----------|-------------------------------------------------------------------------------------------------------------|
| A0A087WY   | 2 | 2 | 13.5747 | 8.09E-09  | 4.15E-08 | 4.68949  | 1      | E8 blank    | P-0.3PG-E8- | 168525.3 | Neuroblastoma breakpoint family member 26 OS=Homo sapiens OX=9606 GN=NBPF26 PE=4 SV=3                       |
| Q7Z3K6;A8  | 2 | 2 | 10.9357 | 6.04E-10  | 7.17E-09 | Infinity | 1      | F-0.3PG-E8- | E8 blank    | 62063.95 | Mesoderm induction early response protein 3 OS=Homo sapiens OX=9606 GN=MIER3 PE=1 SV=2                      |
| A0A087X1U  | 2 | 2 | 11.2112 | 1.31E-05  | 1.93E-05 | 261.822  | 1      | E8 blank    | F-0.3PG-E8- | 83658.63 | Arf-GAP with GTPase_ ANK repeat and PH domain-containing protein 1 OS=Homo sapiens OX=9606 GN=AGAP:         |
| P41182     | 2 | 2 | 10.1214 | 0.0029722 | 0.003296 | 5.59156  | 0.9848 | F-0.3PG-E8- | E8 blank    | 80671.52 | B-cell lymphoma 6 protein OS=Homo sapiens OX=9606 GN=BCL6 PE=1 SV=1                                         |
| G5E9G7;Q9  | 2 | 2 | 8.6371  | 4.06E-08  | 1.35E-07 | 6.28241  | 1      | P-0.3PG-E8- | E8 blank    | 186224.2 | Neurexin 2_ isoform CRA_a OS=Homo sapiens OX=9606 GN=NRXN2 PE=1 SV=1                                        |
| E7ESG2;Q9  | 2 | 2 | 15.3772 | 2.89E-05  | 4.04E-05 | 1.5623   | 1      | E8 blank    | P-0.3PG-E8- | 145944   | Claspin OS=Homo sapiens OX=9606 GN=CLSPN PE=1 SV=1                                                          |
| Q15029     | 2 | 2 | 9.561   | 0.0003355 | 0.000408 | 2.84574  | 1      | E8 blank    | P-0.3PG-E8- | 110405.4 | 116 kDa U5 small nuclear ribonucleoprotein component OS=Homo sapiens OX=9606 GN=EFTUD2 PE=1 SV=1            |
| A0A0C4DGI  | 2 | 2 | 11.3069 | 0.0144632 | 0.015477 | 1.4506   | 0.8444 | E8 blank    | P-0.3PG-E8- | 121109.8 | Cell division cycle and apoptosis regulator protein 1 (Fragment) OS=Homo sapiens OX=9606 GN=CCAR1 PE=1 SV=1 |
| Q9H2L5;Q5  | 2 | 2 | 11.9648 | 2.47E-08  | 9.40E-08 | 2.37033  | 1      | F-0.3PG-E8- | E8 blank    | 37147.48 | Ras association domain-containing protein 4 OS=Homo sapiens OX=9606 GN=RASSF4 PE=1 SV=2                     |
| E9PEP6     | 2 | 2 | 9.2517  | 4.22E-06  | 6.86E-06 | 2.44687  | 1      | F-0.3PG-E8- | E8 blank    | 102552.1 | Neuropilin OS=Homo sapiens OX=9606 GN=NRP1 PE=1 SV=2                                                        |
| A0A0A0MR   | 2 | 2 | 14.8458 | 4.01E-06  | 6.54E-06 | 1.83249  | 1      | E8 blank    | F-0.3PG-E8- | 85953.53 | Actin-binding LIM protein 1 OS=Homo sapiens OX=9606 GN=ABLIM1 PE=1 SV=1                                     |
| O75534     | 2 | 2 | 13.857  | 1.79E-05  | 2.58E-05 | 1.99693  | 1      | E8 blank    | P-0.3PG-E8- | 89740.2  | Cold shock domain-containing protein E1 OS=Homo sapiens OX=9606 GN=CSDE1 PE=1 SV=2                          |
| Q07890;G3  | 2 | 2 | 18.4668 | 4.76E-09  | 2.93E-08 | 7.26791  | 1      | P-0.3PG-E8- | E8 blank    | 154348.1 | Son of sevenless homolog 2 OS=Homo sapiens OX=9606 GN=SOS2 PE=1 SV=2                                        |
| E9PCJ7     | 2 | 2 | 9.2043  | 9.90E-05  | 0.000129 | 2.44896  | 1      | E8 blank    | P-0.3PG-E8- | 42067.99 | Putative E3 ubiquitin-protein ligase UBR7 OS=Homo sapiens OX=9606 GN=UBR7 PE=1 SV=2                         |
| Q96AC1     | 2 | 2 | 9.4619  | 6.24E-05  | 8.31E-05 | 2.62867  | 1      | E8 blank    | F-0.3PG-E8- | 78488    | Fermitin family homolog 2 OS=Homo sapiens OX=9606 GN=FERMT2 PE=1 SV=1                                       |
| Q9ULL1     | 2 | 2 | 10.86   | 1.54E-07  | 3.86E-07 | 3.55982  | 1      | F-0.3PG-E8- | E8 blank    | 156637.3 | Pleckstrin homology domain-containing family G member 1 OS=Homo sapiens OX=9606 GN=PLEKHG1 PE=1 SV=1        |
| Q6NXS1;P4  | 2 | 2 | 9.9529  | 5.16E-07  | 1.05E-06 | 10.2941  | 1      | E8 blank    | F-0.3PG-E8- | 23163.47 | Protein phosphatase inhibitor 2 family member B OS=Homo sapiens OX=9606 GN=PPP1R2B PE=1 SV=2                |
| E7ENM8;PQ  | 2 | 2 | 9.815   | 1.07E-07  | 3.00E-07 | 6.87341  | 1      | P-0.3PG-E8- | E8 blank    | 77485.6  | Tyrosine-protein kinase OS=Homo sapiens OX=9606 GN=FES PE=1 SV=1                                            |
| Q14676     | 2 | 2 | 8.4751  | 2.93E-08  | 1.05E-07 | 6.30443  | 1      | P-0.3PG-E8- | E8 blank    | 227806.9 | Mediator of DNA damage checkpoint protein 1 OS=Homo sapiens OX=9606 GN=MDC1 PE=1 SV=3                       |
| A6NI28;H0V | 2 | 2 | 11.288  | 4.70E-06  | 7.54E-06 | 1.5248   | 1      | E8 blank    | P-0.3PG-E8- | 99310.56 | Rho GTPase-activating protein 42 OS=Homo sapiens OX=9606 GN=ARHGAP42 PE=1 SV=3                              |
| C9J240;E7E | 2 | 2 | 11.1553 | 1.25E-05  | 1.86E-05 | 1.50542  | 1      | E8 blank    | F-0.3PG-E8- | 125898.8 | Anion exchange protein OS=Homo sapiens OX=9606 GN=SLC4A10 PE=1 SV=1                                         |
| P17036;Q8  | 2 | 2 | 17.5413 | 2.68E-07  | 6.16E-07 | 1.98247  | 1      | E8 blank    | P-0.3PG-E8- | 51885.42 | Zinc finger protein 3 OS=Homo sapiens OX=9606 GN=ZNF3 PE=1 SV=3                                             |
| M0R2P6;Q8  | 2 | 2 | 8.0256  | 8.80E-06  | 1.33E-05 | 4.34592  | 1      | P-0.3PG-E8- | E8 blank    | 74335.05 | SH3KBP1 binding protein 1_ isoform CRA_c OS=Homo sapiens OX=9606 GN=SHKBP1 PE=1 SV=1                        |
| Q9NQ38     | 2 | 2 | 15.4474 | 6.58E-06  | 1.02E-05 | 1.3506   | 1      | F-0.3PG-E8- | P-0.3PG-E8- | 124421.5 | Serine protease inhibitor Kazal-type 5 OS=Homo sapiens OX=9606 GN=SPINK5 PE=1 SV=2                          |
| Q8TF05;J3K | 2 | 2 | 9.0758  | 4.75E-09  | 2.93E-08 | 15.0242  | 1      | P-0.3PG-E8- | E8 blank    | 108429.9 | Serine/threonine-protein phosphatase 4 regulatory subunit 1 OS=Homo sapiens OX=9606 GN=PPP4R1 PE=1 SV=1     |
| G3V3E1;G3  | 2 | 2 | 10.0636 | 1.05E-06  | 1.95E-06 | 7.6475   | 1      | F-0.3PG-E8- | E8 blank    | 96841.37 | SKI family transcriptional corepressor 1 OS=Homo sapiens OX=9606 GN=SKOR1 PE=3 SV=1                         |
| Q8TEW0;Q   | 2 | 2 | 10.7239 | 0.1787252 | 0.181558 | 1.09051  | 0.3055 | F-0.3PG-E8- | E8 blank    | 151936.6 | Partitioning defective 3 homolog OS=Homo sapiens OX=9606 GN=PARD3 PE=1 SV=2                                 |
| D6RCC7;Q9  | 2 | 2 | 15.4468 | 4.12E-07  | 8.71E-07 | 2.77663  | 1      | E8 blank    | P-0.3PG-E8- | 125104   | Protein FAM135A OS=Homo sapiens OX=9606 GN=FAM135A PE=1 SV=1                                                |
| A0A0A0MR   | 2 | 2 | 21.6824 | 7.36E-09  | 3.90E-08 | 5.32644  | 1      | E8 blank    | P-0.3PG-E8- | 74544.31 | Nucleolar and coiled-body phosphoprotein 1 (Fragment) OS=Homo sapiens OX=9606 GN=NOLC1 PE=1 SV=1            |
| A6PVD3;P5  | 2 | 2 | 15.7383 | 1.68E-13  | 1.08E-10 | 147.518  | 1      | P-0.3PG-E8- | E8 blank    | 23472.27 | Transcription factor SOX-10 (Fragment) OS=Homo sapiens OX=9606 GN=SOX10 PE=1 SV=1                           |
| A0A0G2JLG  | 2 | 2 | 14.6228 | 0.0057121 | 0.006259 | 1.17518  | 0.9519 | P-0.3PG-E8- | F-0.3PG-E8- | 113731.6 | IQ motif and SEC7 domain-containing protein 3 (Fragment) OS=Homo sapiens OX=9606 GN=IQSEC3 PE=1 SV=1        |
| P54277;Q3  | 2 | 2 | 9.939   | 2.79E-07  | 6.32E-07 | 4.87192  | 1      | P-0.3PG-E8- | E8 blank    | 106686.1 | PMS1 protein homolog 1 OS=Homo sapiens OX=9606 GN=PMS1 PE=1 SV=1                                            |
| J3KT14     | 2 | 2 | 8.8767  | 1.05E-05  | 1.58E-05 | 1.27863  | 1      | F-0.3PG-E8- | P-0.3PG-E8- | 28563.26 | THO complex subunit 1 OS=Homo sapiens OX=9606 GN=THOC1 PE=1 SV=1                                            |
| O94925     | 2 | 2 | 14.4194 | 2.51E-07  | 5.83E-07 | 6.12817  | 1      | F-0.3PG-E8- | E8 blank    | 74316.67 | Glutaminase kidney isoform_ mitochondrial OS=Homo sapiens OX=9606 GN=GLS PE=1 SV=1                          |
| H7BYY2;H7  | 2 | 2 | 9.9307  | 3.38E-10  | 5.28E-09 | 8.98091  | 1      | P-0.3PG-E8- | E8 blank    | 139860.1 | BCL-6 corepressor (Fragment) OS=Homo sapiens OX=9606 GN=BCOR PE=1 SV=1                                      |
| G5E9A6;P5  | 2 | 2 | 11.2609 | 2.38E-07  | 5.57E-07 | 3.0119   | 1      | E8 blank    | P-0.3PG-E8- | 106057.7 | Ubiquitin carboxyl-terminal hydrolase OS=Homo sapiens OX=9606 GN=USP11 PE=1 SV=1                            |
| Q8IWJ2;B8  | 4 | 2 | 19.4075 | 0.0007315 | 0.000859 | 1.79254  | 0.9997 | P-0.3PG-E8- | E8 blank    | 196993.4 | GRIP and coiled-coil domain-containing protein 2 OS=Homo sapiens OX=9606 GN=GCC2 PE=1 SV=4                  |
| Q96H12;X6  | 2 | 2 | 9.3788  | 7.10E-06  | 1.09E-05 | 2.39198  | 1      | P-0.3PG-E8- | E8 blank    | 32705.35 | Myb/SANT-like DNA-binding domain-containing protein 3 OS=Homo sapiens OX=9606 GN=MSANTD3 PE=1 SV=1          |
| P61224     | 2 | 2 | 9.8727  | 0.1258912 | 0.129114 | 1.36832  | 0.3793 | F-0.3PG-E8- | P-0.3PG-E8- | 21052.94 | Ras-related protein Rap-1b OS=Homo sapiens OX=9606 GN=RAP1B PE=1 SV=1                                       |
| J3KMZ8;Q9  | 2 | 2 | 13.8517 | 1.17E-06  | 2.11E-06 | 2.4908   | 1      | E8 blank    | P-0.3PG-E8- | 46920.91 | Zinc finger protein ubi-d4 OS=Homo sapiens OX=9606 GN=DPF2 PE=1 SV=1                                        |
| P48751;F8V | 2 | 2 | 10.1767 | 1.95E-09  | 1.54E-08 | 11.8747  | 1      | P-0.3PG-E8- | E8 blank    | 136247.3 | Anion exchange protein 3 OS=Homo sapiens OX=9606 GN=SLC4A3 PE=1 SV=2                                        |
| Q8WUB2;F   | 2 | 2 | 15.041  | 8.28E-06  | 1.26E-05 | 1.69795  | 1      | E8 blank    | P-0.3PG-E8- | 31020.05 | Protein FAM216A OS=Homo sapiens OX=9606 GN=FAM216A PE=2 SV=1                                                |
| B7Z3H4;Q5  | 2 | 2 | 19.3566 | 1.53E-08  | 6.46E-08 | 3.3613   | 1      | P-0.3PG-E8- | E8 blank    | 67242.3  | Beta-transducin repeat containing isoform 4 OS=Homo sapiens OX=9606 GN=BTRC PE=1 SV=1                       |
| H0Y954     | 2 | 2 | 14.635  | 2.13E-06  | 3.67E-06 | 7.90198  | 1      | E8 blank    | F-0.3PG-E8- | 19316.8  | Transforming acidic coiled-coil-containing protein 2 (Fragment) OS=Homo sapiens OX=9606 GN=TACC2 PE=1 SV=1  |
| P08621     | 2 | 2 | 8.9538  | 1.16E-06  | 2.10E-06 | 4.45741  | 1      | E8 blank    | F-0.3PG-E8- | 51613.78 | U1 small nuclear ribonucleoprotein 70 kDa OS=Homo sapiens OX=9606 GN=SNRNP70 PE=1 SV=2                      |
| Q5JXC2     | 2 | 2 | 9.7656  | 6.12E-06  | 9.53E-06 | 5.36209  | 1      | P-0.3PG-E8- | E8 blank    | 43394.4  | Migration and invasion-inhibitory protein OS=Homo sapiens OX=9606 GN=MIIP PE=1 SV=3                         |
| B4DLR6;B4  | 2 | 2 | 9.8709  | 6.16E-07  | 1.23E-06 | 3.84401  | 1      | P-0.3PG-E8- | E8 blank    | 35316.66 | Protocadherin-18 OS=Homo sapiens OX=9606 GN=PCDH18 PE=1 SV=1                                                |
| A0A087WS   | 3 | 2 | 15.976  | 5.05E-07  | 1.03E-06 | 4.67906  | 1      | F-0.3PG-E8- | E8 blank    | 98240.14 | Zinc finger protein 43 OS=Homo sapiens OX=9606 GN=ZNF43 PE=1 SV=1                                           |
| H0Y6E7;Q9  | 3 | 2 | 14.9362 | 2.85E-06  | 4.79E-06 | 1.97256  | 1      | F-0.3PG-E8- | E8 blank    | 31745.77 | RNA-binding motif protein_ X chromosome (Fragment) OS=Homo sapiens OX=9606 GN=RBMX PE=1 SV=2                |
| Q0D2K5     | 3 | 2 | 21.9415 | 2.80E-10  | 4.59E-09 | 7.68219  | 1      | P-0.3PG-E8- | E8 blank    | 23057.31 | Putative EGF-like and EMI domain-containing protein 1 OS=Homo sapiens OX=9606 GN=EGFEM1P PE=5 SV=1          |

|            |   |   |         |           |          |          |        |             |             |          |                                                                                                          |
|------------|---|---|---------|-----------|----------|----------|--------|-------------|-------------|----------|----------------------------------------------------------------------------------------------------------|
| Q6PG37;E9  | 4 | 2 | 29.8945 | 1.05E-07  | 2.97E-07 | 2.22715  | 1      | F-0.3PG-E8- | E8 blank    | 76738.37 | Zinc finger protein 790 OS=Homo sapiens OX=9606 GN=ZNF790 PE=2 SV=2                                      |
| A0A0C4DG   | 2 | 2 | 9.7895  | 2.02E-06  | 3.48E-06 | 5.16285  | 1      | E8 blank    | P-0.3PG-E8- | 54155.02 | Phosphatidylinositol 4-phosphate 3-kinase C2 domain-containing subunit alpha OS=Homo sapiens OX=9606 GN= |
| Q86WZ6     | 3 | 2 | 27.0042 | 5.14E-07  | 1.05E-06 | 10.3776  | 1      | P-0.3PG-E8- | E8 blank    | 94656.23 | Zinc finger protein 227 OS=Homo sapiens OX=9606 GN=ZNF227 PE=1 SV=1                                      |
| D6R9G8;Q9  | 2 | 2 | 10.3017 | 5.60E-06  | 8.82E-06 | 1.75371  | 1      | F-0.3PG-E8- | E8 blank    | 94714.11 | Synphilin-1 (Fragment) OS=Homo sapiens OX=9606 GN=SNCAIP PE=1 SV=2                                       |
| Q9UBG0     | 2 | 2 | 10.0002 | 1.39E-07  | 3.55E-07 | 34.0978  | 1      | F-0.3PG-E8- | E8 blank    | 169868.2 | C-type mannose receptor 2 OS=Homo sapiens OX=9606 GN=MRC2 PE=1 SV=2                                      |
| Q9H4L5     | 3 | 2 | 19.8719 | 0.1547448 | 0.157526 | 1.13988  | 0.3351 | F-0.3PG-E8- | P-0.3PG-E8- | 102193.2 | Oxysterol-binding protein-related protein 3 OS=Homo sapiens OX=9606 GN=OSBPL3 PE=1 SV=1                  |
| Q8TDD1     | 2 | 2 | 8.9304  | 0.0004594 | 0.000548 | 2.569    | 0.9999 | F-0.3PG-E8- | E8 blank    | 98880.09 | ATP-dependent RNA helicase DDX54 OS=Homo sapiens OX=9606 GN=DDX54 PE=1 SV=2                              |
| P49916     | 5 | 2 | 31.7545 | 1.39E-08  | 6.08E-08 | Infinity | 1      | P-0.3PG-E8- | E8 blank    | 114389.8 | DNA ligase 3 OS=Homo sapiens OX=9606 GN=LIG3 PE=1 SV=2                                                   |
| K7EQ05;P2  | 2 | 2 | 10.1931 | 5.76E-06  | 9.02E-06 | 1.90541  | 1      | P-0.3PG-E8- | E8 blank    | 50406.96 | Progranulin OS=Homo sapiens OX=9606 GN=GRN PE=1 SV=1                                                     |
| A5PLK6;H3  | 4 | 2 | 21.2948 | 2.61E-07  | 6.04E-07 | 3.30186  | 1      | F-0.3PG-E8- | E8 blank    | 126886   | Regulator of G-protein signaling protein-like OS=Homo sapiens OX=9606 GN=RGSL1 PE=2 SV=1                 |
| Q9P2G1     | 3 | 2 | 15.0159 | 0.0001603 | 0.000202 | 1.32642  | 1      | F-0.3PG-E8- | P-0.3PG-E8- | 124111.8 | Ankyrin repeat and IBR domain-containing protein 1 OS=Homo sapiens OX=9606 GN=ANKIB1 PE=1 SV=3           |
| A0A0A0MR   | 2 | 2 | 9.379   | 8.56E-10  | 8.85E-09 | 9.53834  | 1      | P-0.3PG-E8- | E8 blank    | 92983.68 | Nucleosome-remodeling factor subunit BPTF OS=Homo sapiens OX=9606 GN=BPTF PE=1 SV=1                      |
| P46063     | 2 | 2 | 9.9168  | 1.17E-07  | 3.16E-07 | 39.839   | 1      | P-0.3PG-E8- | E8 blank    | 74484    | ATP-dependent DNA helicase Q1 OS=Homo sapiens OX=9606 GN=RECQL PE=1 SV=3                                 |
| A0A7P0TAK  | 2 | 2 | 17.0237 | 8.51E-07  | 1.63E-06 | 10.0715  | 1      | F-0.3PG-E8- | E8 blank    | 200049.9 | Neurogenic locus notch homolog protein 1 OS=Homo sapiens OX=9606 GN=NOTCH1 PE=4 SV=1                     |
| H0YH68     | 2 | 2 | 10.9586 | 1.68E-05  | 2.43E-05 | 2.75013  | 1      | P-0.3PG-E8- | E8 blank    | 21240.53 | Serine/threonine-protein kinase WNK1 (Fragment) OS=Homo sapiens OX=9606 GN=WNK1 PE=1 SV=8                |
| Q9HCM1     | 3 | 2 | 15.4177 | 4.45E-07  | 9.29E-07 | 2.88479  | 1      | P-0.3PG-E8- | E8 blank    | 196682.5 | Retroelement silencing factor 1 OS=Homo sapiens OX=9606 GN=RESF1 PE=1 SV=3                               |
| Q86X53;E5  | 3 | 2 | 18.9284 | 8.90E-09  | 4.36E-08 | 4.89194  | 1      | E8 blank    | P-0.3PG-E8- | 49212.55 | Glutamate-rich protein 1 OS=Homo sapiens OX=9606 GN=ERICH1 PE=1 SV=1                                     |
| A0A0J9YW5  | 3 | 2 | 22.7943 | 2.31E-05  | 3.29E-05 | 1.69892  | 1      | P-0.3PG-E8- | E8 blank    | 36426.88 | Proprotein convertase subtilisin/kexin type 6 OS=Homo sapiens OX=9606 GN=PCSK6 PE=1 SV=1                 |
| Q6NSJ2     | 2 | 2 | 9.2264  | 0.0508261 | 0.053148 | 1.16327  | 0.588  | E8 blank    | P-0.3PG-E8- | 72653.22 | Pleckstrin homology-like domain family B member 3 OS=Homo sapiens OX=9606 GN=PHLDB3 PE=1 SV=3            |
| A0A1B0GTF  | 3 | 2 | 20.9363 | 1.00E-06  | 1.87E-06 | 5.46009  | 1      | E8 blank    | F-0.3PG-E8- | 104585.4 | Mitogen-activated protein kinase kinase kinase 19 (Fragment) OS=Homo sapiens OX=9606 GN=MAP3K19 PE=4     |
| Q8N1I0;H0  | 4 | 2 | 21.6507 | 1.89E-06  | 3.30E-06 | 4.23143  | 1      | P-0.3PG-E8- | E8 blank    | 227031.6 | Dedicator of cytokinesis protein 4 OS=Homo sapiens OX=9606 GN=DOCK4 PE=1 SV=3                            |
| Q96E09     | 2 | 2 | 21.8466 | 5.75E-06  | 9.02E-06 | 2.25582  | 1      | F-0.3PG-E8- | E8 blank    | 30814.27 | PPP2R1A-PPP2R2A-interacting phosphatase regulator 1 OS=Homo sapiens OX=9606 GN=PABIR1 PE=1 SV=1          |
| A0A6I8PIK4 | 2 | 2 | 9.9381  | 0.000494  | 0.000589 | 1.23152  | 0.9999 | F-0.3PG-E8- | P-0.3PG-E8- | 52923.55 | DnaJ homolog subfamily C member 7 OS=Homo sapiens OX=9606 GN=DNAJC7 PE=1 SV=1                            |
| F8VVT9;J3K | 4 | 2 | 20.4614 | 1.67E-08  | 6.96E-08 | 2.87114  | 1      | P-0.3PG-E8- | E8 blank    | 125389.1 | Arf-GAP with GTPase_ ANK repeat and PH domain-containing protein 2 OS=Homo sapiens OX=9606 GN=AGAP2      |
| A0A286YEY  | 4 | 2 | 22.94   | 6.80E-07  | 1.34E-06 | 1.6767   | 1      | F-0.3PG-E8- | E8 blank    | 44547.17 | Immunoglobulin heavy constant gamma 2 (Fragment) OS=Homo sapiens OX=9606 GN=IGHG2 PE=1 SV=1              |
| P78563     | 2 | 2 | 10.1198 | 0.0033501 | 0.003702 | 1.28799  | 0.9808 | F-0.3PG-E8- | E8 blank    | 81162.74 | Double-stranded RNA-specific editase 1 OS=Homo sapiens OX=9606 GN=ADARB1 PE=1 SV=1                       |
| Q460N5;A0  | 3 | 2 | 19.0444 | 2.28E-09  | 1.68E-08 | 15.1076  | 1      | P-0.3PG-E8- | E8 blank    | 204853.4 | Protein mono-ADP-ribosyltransferase PARP14 OS=Homo sapiens OX=9606 GN=PARP14 PE=1 SV=3                   |
| Q96JM7;E9  | 4 | 2 | 29.8209 | 1.45E-06  | 2.57E-06 | 1.83746  | 1      | E8 blank    | P-0.3PG-E8- | 89705.45 | Lethal(3)malignant brain tumor-like protein 3 OS=Homo sapiens OX=9606 GN=L3MBTL3 PE=1 SV=2               |
| Q13137;D6  | 3 | 2 | 13.8548 | 0.2370996 | 0.240096 | 1.11495  | 0.2507 | E8 blank    | P-0.3PG-E8- | 52995.29 | Calcium-binding and coiled-coil domain-containing protein 2 OS=Homo sapiens OX=9606 GN=CALCOCO2 PE=1     |
| Q8TDI0;K7E | 3 | 2 | 18.7469 | 1.08E-09  | 1.04E-08 | 32.7248  | 1      | P-0.3PG-E8- | E8 blank    | 224646.7 | Chromodomain-helicase-DNA-binding protein 5 OS=Homo sapiens OX=9606 GN=CHD5 PE=1 SV=1                    |
| P15172     | 3 | 2 | 15.1919 | 9.29E-08  | 2.69E-07 | 29.8028  | 1      | P-0.3PG-E8- | E8 blank    | 35071.69 | Myoblast determination protein 1 OS=Homo sapiens OX=9606 GN=MYOD1 PE=1 SV=3                              |
| Q9ULE3;F8  | 4 | 2 | 33.1358 | 6.28E-09  | 3.50E-08 | 5.82813  | 1      | F-0.3PG-E8- | E8 blank    | 114765.4 | DENN domain-containing protein 2A OS=Homo sapiens OX=9606 GN=DENND2A PE=1 SV=4                           |
| Q92620     | 3 | 2 | 19.3201 | 0.013784  | 0.0148   | 3.01867  | 0.8519 | E8 blank    | P-0.3PG-E8- | 141358.4 | Pre-mRNA-splicing factor ATP-dependent RNA helicase PRP16 OS=Homo sapiens OX=9606 GN=DHX38 PE=1 SV       |
| A0A2R8Y7U  | 2 | 2 | 13.2711 | 1.08E-08  | 5.00E-08 | 4.72104  | 1      | E8 blank    | P-0.3PG-E8- | 181377.2 | GATOR complex protein DEPDC5 OS=Homo sapiens OX=9606 GN=DEPDC5 PE=1 SV=1                                 |
| A0A7P0T8V  | 3 | 2 | 18.0748 | 0.0001306 | 0.000167 | 3.26624  | 1      | F-0.3PG-E8- | E8 blank    | 70393.57 | Oligophrenin-1 OS=Homo sapiens OX=9606 GN=OPHN1 PE=4 SV=1                                                |
| A0A0A0MS   | 3 | 2 | 20.6002 | 7.25E-09  | 3.87E-08 | 4.83844  | 1      | P-0.3PG-E8- | E8 blank    | 38137.16 | Negative elongation factor E (Fragment) OS=Homo sapiens OX=9606 GN=NELFE PE=1 SV=6                       |
| O43719;Q5  | 2 | 2 | 9.703   | 1.27E-06  | 2.29E-06 | 30.2925  | 1      | E8 blank    | F-0.3PG-E8- | 86423.16 | HIV Tat-specific factor 1 OS=Homo sapiens OX=9606 GN=HTATSF1 PE=1 SV=1                                   |
| Q7Z3V5     | 3 | 2 | 14.1299 | 1.16E-07  | 3.14E-07 | 1.72313  | 1      | P-0.3PG-E8- | E8 blank    | 73244.74 | Zinc finger protein 571 OS=Homo sapiens OX=9606 GN=ZNF571 PE=2 SV=3                                      |
| K7ER00;K7E | 3 | 2 | 28.7743 | 3.72E-10  | 5.57E-09 | 12.7247  | 1      | P-0.3PG-E8- | E8 blank    | 62452.44 | Phenylalanine--tRNA ligase OS=Homo sapiens OX=9606 GN=FARSA PE=1 SV=1                                    |
| F5H630;P5  | 3 | 2 | 14.3683 | 4.35E-05  | 5.94E-05 | 3.90025  | 1      | E8 blank    | P-0.3PG-E8- | 87666.55 | Zinc finger protein 84 OS=Homo sapiens OX=9606 GN=ZNF84 PE=1 SV=1                                        |
| H7C4C9;Q3  | 2 | 2 | 20.303  | 4.45E-06  | 7.17E-06 | 1.76137  | 1      | E8 blank    | P-0.3PG-E8- | 70248.94 | Protein FAM161A (Fragment) OS=Homo sapiens OX=9606 GN=FAM161A PE=1 SV=1                                  |
| Q5JVG8;F5  | 2 | 2 | 11.2952 | 2.61E-08  | 9.79E-08 | 8.11414  | 1      | F-0.3PG-E8- | E8 blank    | 53019.27 | Zinc finger protein 506 OS=Homo sapiens OX=9606 GN=ZNF506 PE=2 SV=2                                      |
| P52738     | 2 | 2 | 9.7383  | 1.37E-07  | 3.51E-07 | 2.81951  | 1      | E8 blank    | F-0.3PG-E8- | 54364.84 | Zinc finger protein 140 OS=Homo sapiens OX=9606 GN=ZNF140 PE=1 SV=2                                      |
| K7EJD3;K7E | 2 | 2 | 10.6077 | 3.45E-07  | 7.49E-07 | 2.98264  | 1      | E8 blank    | P-0.3PG-E8- | 22622.07 | Galectin-3-binding protein OS=Homo sapiens OX=9606 GN=LGALS3BP PE=1 SV=1                                 |
| P41002     | 2 | 2 | 10.5151 | 0.0001358 | 0.000173 | 851.616  | 1      | E8 blank    | P-0.3PG-E8- | 89464.77 | Cyclin-F OS=Homo sapiens OX=9606 GN=CCNF PE=1 SV=2                                                       |
| Q8IVG5     | 6 | 2 | 39.0317 | 1.30E-07  | 3.38E-07 | 3.92031  | 1      | P-0.3PG-E8- | E8 blank    | 186243.7 | Sterile alpha motif domain-containing protein 9-like OS=Homo sapiens OX=9606 GN=SAMD9L PE=1 SV=2         |
| E9PG71;P5  | 3 | 2 | 15.4985 | 5.14E-05  | 6.98E-05 | 2.66753  | 1      | P-0.3PG-E8- | E8 blank    | 107370   | Receptor protein-tyrosine kinase OS=Homo sapiens OX=9606 GN=EPHA4 PE=1 SV=1                              |
| Q08999     | 3 | 2 | 12.423  | 9.94E-07  | 1.87E-06 | 3.15881  | 1      | P-0.3PG-E8- | E8 blank    | 129792.5 | Retinoblastoma-like protein 2 OS=Homo sapiens OX=9606 GN=RBL2 PE=1 SV=3                                  |
| A0A7P0T8C  | 3 | 2 | 17.0245 | 2.88E-09  | 1.94E-08 | 7.66609  | 1      | F-0.3PG-E8- | E8 blank    | 71069.51 | Sorting nexin-9 OS=Homo sapiens OX=9606 GN=SNX9 PE=4 SV=1                                                |
| Q96NG8;A0  | 3 | 2 | 15.4546 | 5.18E-08  | 1.65E-07 | 3.56807  | 1      | P-0.3PG-E8- | E8 blank    | 61866.4  | Zinc finger protein 582 OS=Homo sapiens OX=9606 GN=ZNF582 PE=2 SV=1                                      |

|            |   |   |         |           |          |         |        |             |             |          |                                                                                                                              |
|------------|---|---|---------|-----------|----------|---------|--------|-------------|-------------|----------|------------------------------------------------------------------------------------------------------------------------------|
| Q96NB3     | 3 | 2 | 14.2494 | 2.29E-05  | 3.27E-05 | 2.1254  | 1      | F-0.3PG-E8- | E8 blank    | 42169.82 | Zinc finger protein 830 OS=Homo sapiens OX=9606 GN=ZNF830 PE=1 SV=2                                                          |
| A0A286YFJ  | 6 | 2 | 37.1111 | 1.13E-08  | 5.19E-08 | 5.0603  | 1      | E8 blank    | P-0.3PG-E8- | 44459.01 | Immunoglobulin heavy constant gamma 4 (Fragment) OS=Homo sapiens OX=9606 GN=IGHG4 PE=1 SV=1                                  |
| Q7RTP6     | 6 | 2 | 33.9598 | 2.88E-07  | 6.50E-07 | 1.69628 | 1      | P-0.3PG-E8- | E8 blank    | 225435.7 | [F-actin]-monooxygenase MICAL3 OS=Homo sapiens OX=9606 GN=MICAL3 PE=1 SV=2                                                   |
| H0YLN8;Q9  | 3 | 2 | 13.7303 | 0.0020112 | 0.002274 | 1.46023 | 0.9935 | F-0.3PG-E8- | E8 blank    | 214736.4 | Non-specific serine/threonine protein kinase OS=Homo sapiens OX=9606 GN=TRPM7 PE=1 SV=1                                      |
| B9EG95;O9  | 3 | 2 | 15.3572 | 5.77E-05  | 7.78E-05 | 5.40121 | 1      | P-0.3PG-E8- | E8 blank    | 61243.2  | ZNF682 protein OS=Homo sapiens OX=9606 GN=ZNF682 PE=1 SV=1                                                                   |
| A0A7P0T7Z  | 3 | 2 | 16.2493 | 0.6171284 | 0.618093 | 1.17217 | 0.1026 | P-0.3PG-E8- | E8 blank    | 136809.4 | Jouberein OS=Homo sapiens OX=9606 GN=AH11 PE=4 SV=1                                                                          |
| Q6ZSZ6;H0  | 6 | 2 | 29.8065 | 0.0961919 | 0.09929  | 1.16321 | 0.4396 | F-0.3PG-E8- | P-0.3PG-E8- | 118885.9 | Teashirt homolog 1 OS=Homo sapiens OX=9606 GN=TSHZ1 PE=1 SV=2                                                                |
| Q8TD23     | 3 | 2 | 19.1088 | 5.13E-06  | 8.16E-06 | 21.1057 | 1      | F-0.3PG-E8- | E8 blank    | 68522.97 | Zinc finger protein 675 OS=Homo sapiens OX=9606 GN=ZNF675 PE=1 SV=3                                                          |
| Q9Y2L6;E9  | 3 | 2 | 12.7756 | 1.25E-05  | 1.86E-05 | 4.88439 | 1      | E8 blank    | F-0.3PG-E8- | 118902.4 | FERM domain-containing protein 4B OS=Homo sapiens OX=9606 GN=FRMD4B PE=1 SV=4                                                |
| Q13136;E9  | 2 | 2 | 9.7936  | 1.14E-07  | 3.11E-07 | 6.63114 | 1      | P-0.3PG-E8- | E8 blank    | 136349.3 | Liprin-alpha-1 OS=Homo sapiens OX=9606 GN=PPFIA1 PE=1 SV=1                                                                   |
| C9J066;E9P | 3 | 2 | 13.1784 | 1.49E-08  | 6.35E-08 | 21.1102 | 1      | P-0.3PG-E8- | E8 blank    | 240189.4 | Ninein OS=Homo sapiens OX=9606 GN=NIN PE=1 SV=1                                                                              |
| E5RFZ5;E5F | 2 | 2 | 16.7682 | 1.23E-07  | 3.25E-07 | 82.9324 | 1      | P-0.3PG-E8- | E8 blank    | 20173.66 | Double-strand-break repair protein rad21 homolog OS=Homo sapiens OX=9606 GN=RAD21 PE=1 SV=1                                  |
| A0A2R8Y57  | 4 | 2 | 35.2163 | 5.46E-09  | 3.18E-08 | 10.5681 | 1      | E8 blank    | P-0.3PG-E8- | 87150.8  | Band 4.1 OS=Homo sapiens OX=9606 GN=EPB41 PE=1 SV=1                                                                          |
| P14868     | 3 | 2 | 24.5797 | 4.02E-07  | 8.54E-07 | 12.7105 | 1      | P-0.3PG-E8- | E8 blank    | 57535.52 | Aspartate--tRNA ligase_ cytoplasmic OS=Homo sapiens OX=9606 GN=DARS1 PE=1 SV=2                                               |
| Q8N108     | 3 | 2 | 21.891  | 4.93E-10  | 6.73E-09 | 7.71882 | 1      | F-0.3PG-E8- | E8 blank    | 58325.5  | Mesoderm induction early response protein 1 OS=Homo sapiens OX=9606 GN=MIER1 PE=1 SV=2                                       |
| E9PAQ1;P2  | 2 | 2 | 10.5169 | 5.40E-09  | 3.18E-08 | 22.4495 | 1      | E8 blank    | P-0.3PG-E8- | 47485.54 | Properdin OS=Homo sapiens OX=9606 GN=CFP PE=1 SV=1                                                                           |
| Q2VY69     | 3 | 2 | 14.7242 | 1.55E-07  | 3.86E-07 | 6.30234 | 1      | F-0.3PG-E8- | E8 blank    | 71243    | Zinc finger protein 284 OS=Homo sapiens OX=9606 GN=ZNF284 PE=2 SV=1                                                          |
| Q13105     | 3 | 2 | 12.6331 | 7.32E-06  | 1.12E-05 | 42.9753 | 1      | P-0.3PG-E8- | E8 blank    | 89809.56 | Zinc finger and BTB domain-containing protein 17 OS=Homo sapiens OX=9606 GN=ZBTB17 PE=1 SV=3                                 |
| A0A3B3IU3  | 3 | 2 | 13.5103 | 1.12E-07  | 3.09E-07 | 20.165  | 1      | E8 blank    | F-0.3PG-E8- | 111469.9 | Unconventional myosin-Ig OS=Homo sapiens OX=9606 GN=MYO1G PE=1 SV=1                                                          |
| A7E2Y1;A0  | 5 | 2 | 30.7824 | 6.74E-07  | 1.33E-06 | 7.36892 | 1      | E8 blank    | F-0.3PG-E8- | 227099.8 | Myosin-7B OS=Homo sapiens OX=9606 GN=MYH7B PE=1 SV=4                                                                         |
| A6QL64;A0  | 7 | 2 | 47.1177 | 1.58E-07  | 3.92E-07 | 5.2153  | 1      | E8 blank    | P-0.3PG-E8- | 216325.4 | Ankyrin repeat domain-containing protein 36A OS=Homo sapiens OX=9606 GN=ANKRD36 PE=2 SV=4                                    |
| A0A087WX   | 3 | 2 | 15.7928 | 5.98E-06  | 9.33E-06 | 1.61554 | 1      | E8 blank    | P-0.3PG-E8- | 52629.95 | Triacylglycerol lipase OS=Homo sapiens OX=9606 GN=PNLIPRP2 PE=1 SV=1                                                         |
| A0A087WU   | 3 | 2 | 24.7654 | 0.0058898 | 0.006443 | 1.17593 | 0.9496 | F-0.3PG-E8- | P-0.3PG-E8- | 65993.49 | Zinc finger protein 714 OS=Homo sapiens OX=9606 GN=ZNF714 PE=1 SV=1                                                          |
| A0A6Q8PG   | 2 | 2 | 8.1555  | 3.18E-07  | 7.09E-07 | 7.57287 | 1      | P-0.3PG-E8- | E8 blank    | 73210.86 | Ligand-dependent corepressor (Fragment) OS=Homo sapiens OX=9606 GN=LCOR PE=1 SV=1                                            |
| A0A7I2YQ9  | 3 | 2 | 15.2587 | 6.34E-11  | 1.77E-09 | 4.83567 | 1      | P-0.3PG-E8- | E8 blank    | 67451.82 | T-plasminogen activator OS=Homo sapiens OX=9606 GN=PLAT PE=1 SV=1                                                            |
| A0A590UJ8  | 2 | 2 | 10.9673 | 3.81E-06  | 6.23E-06 | 2.096   | 1      | P-0.3PG-E8- | E8 blank    | 88398.27 | Arginine-glutamic acid dipeptide repeats protein (Fragment) OS=Homo sapiens OX=9606 GN=RERE PE=1 SV=1                        |
| H7BXL6     | 3 | 2 | 14.3581 | 3.14E-05  | 4.35E-05 | 5.55607 | 1      | F-0.3PG-E8- | E8 blank    | 89532.7  | Otogelin-like protein (Fragment) OS=Homo sapiens OX=9606 GN=OTOGL PE=1 SV=1                                                  |
| A0A5F9ZHM  | 3 | 2 | 28.2874 | 0.1098018 | 0.112793 | 1.21292 | 0.4096 | E8 blank    | P-0.3PG-E8- | 37579.5  | L-lactate dehydrogenase OS=Homo sapiens OX=9606 GN=LDHB PE=1 SV=1                                                            |
| A8MWY0;C   | 3 | 2 | 13.4215 | 0.00217   | 0.00244  | 2.0463  | 0.9923 | E8 blank    | F-0.3PG-E8- | 117207.2 | Endosome/lysosome-associated apoptosis and autophagy regulator family member 2 OS=Homo sapiens OX=9606 GN=PPP1R12B PE=1 SV=1 |
| A0A087X2E  | 1 | 1 | 9.3642  | 1.83E-06  | 3.20E-06 | 26.266  | 1      | P-0.3PG-E8- | E8 blank    | 61279.08 | Baculoviral IAP repeat-containing protein 2 OS=Homo sapiens OX=9606 GN=BIRC2 PE=1 SV=1                                       |
| B5BNW5;E   | 1 | 1 | 10.931  | 9.14E-07  | 1.74E-06 | 99.0735 | 1      | F-0.3PG-E8- | E8 blank    | 25676.53 | Calcium-activated potassium channel subunit beta-2 OS=Homo sapiens OX=9606 GN=KCNMB2 PE=2 SV=1                               |
| H0YJV5     | 1 | 1 | 4.3723  | 2.13E-07  | 5.09E-07 | 4.27676 | 1      | P-0.3PG-E8- | E8 blank    | 10775.02 | Kinectin (Fragment) OS=Homo sapiens OX=9606 GN=KTN1 PE=1 SV=1                                                                |
| E9PNR8;Q9  | 1 | 1 | 7.1594  | 1.09E-07  | 3.03E-07 | 6.9962  | 1      | F-0.3PG-E8- | E8 blank    | 3563.811 | Hypoxia-inducible factor 1-alpha inhibitor OS=Homo sapiens OX=9606 GN=HIF1AN PE=1 SV=1                                       |
| H7BYC7     | 1 | 1 | 5.4644  | 0.0029971 | 0.003318 | 647.452 | 0.9845 | E8 blank    | F-0.3PG-E8- | 15758.33 | Neurexin-1-beta OS=Homo sapiens OX=9606 GN=NRXN1 PE=1 SV=2                                                                   |
| F8VZ96;O6  | 1 | 1 | 9.942   | 0.001188  | 0.00137  | 2.14629 | 0.9984 | E8 blank    | P-0.3PG-E8- | 13473.3  | NUAK family SNF1-like kinase 1 (Fragment) OS=Homo sapiens OX=9606 GN=NUAK1 PE=1 SV=1                                         |
| Q8NEP3     | 1 | 1 | 4.5415  | 7.94E-09  | 4.11E-08 | 15.1826 | 1      | E8 blank    | P-0.3PG-E8- | 80881.64 | Dynein axonemal assembly factor 1 OS=Homo sapiens OX=9606 GN=DNAAF1 PE=2 SV=5                                                |
| H0Y5P0     | 1 | 1 | 5.1453  | 2.72E-07  | 6.21E-07 | 3.22686 | 1      | P-0.3PG-E8- | E8 blank    | 81204.73 | Forkhead-associated domain-containing protein 1 (Fragment) OS=Homo sapiens OX=9606 GN=FHAD1 PE=1 SV=1                        |
| A0A087WS   | 1 | 1 | 5.8888  | 7.62E-08  | 2.27E-07 | 10.137  | 1      | P-0.3PG-E8- | E8 blank    | 18888.08 | TIMM23B-AGAP6 readthrough (NMD candidate) OS=Homo sapiens OX=9606 GN=TIMM23B-AGAP6 PE=4 SV=2                                 |
| B2RXH2     | 1 | 1 | 5.8962  | 1.05E-06  | 1.95E-06 | 21.1015 | 1      | E8 blank    | F-0.3PG-E8- | 57488.68 | Lysine-specific demethylase 4E OS=Homo sapiens OX=9606 GN=KDM4E PE=1 SV=1                                                    |
| Q8NDX1     | 1 | 1 | 10.5386 | 2.00E-09  | 1.55E-08 | 4.31342 | 1      | P-0.3PG-E8- | E8 blank    | 117390   | PH and SEC7 domain-containing protein 4 OS=Homo sapiens OX=9606 GN=PSD4 PE=1 SV=2                                            |
| A0A7P0T87  | 1 | 1 | 11.9638 | 9.33E-05  | 0.000121 | 3.4938  | 1      | E8 blank    | P-0.3PG-E8- | 119529.6 | DNA damage-binding protein 1 OS=Homo sapiens OX=9606 GN=DDDB1 PE=4 SV=1                                                      |
| H0YLK9     | 1 | 1 | 4.7293  | 3.26E-08  | 1.12E-07 | 5.0842  | 1      | F-0.3PG-E8- | E8 blank    | 19871.03 | E3 ubiquitin-protein ligase Arkadia (Fragment) OS=Homo sapiens OX=9606 GN=RNF111 PE=1 SV=1                                   |
| O75526     | 1 | 1 | 8.1044  | 4.17E-07  | 8.79E-07 | 93.4799 | 1      | P-0.3PG-E8- | E8 blank    | 42985.35 | RNA-binding motif protein_ X-linked-like-2 OS=Homo sapiens OX=9606 GN=RBMXL2 PE=1 SV=3                                       |
| H3BTI0;Q9  | 1 | 1 | 10.0588 | 2.01E-09  | 1.55E-08 | 27.7515 | 1      | F-0.3PG-E8- | E8 blank    | 57273.4  | Cysteine-rich secretory protein LCCL domain-containing 2 OS=Homo sapiens OX=9606 GN=CRISPLD2 PE=1 SV=1                       |
| MOROP8;M   | 1 | 1 | 10.3186 | 0.0001011 | 0.000131 | 3.96422 | 1      | E8 blank    | P-0.3PG-E8- | 244997   | Unconventional myosin-IXb OS=Homo sapiens OX=9606 GN=MYO9B PE=1 SV=1                                                         |
| C9JUF0;E7E | 1 | 1 | 5.2691  | 6.24E-10  | 7.17E-09 | 351.524 | 1      | E8 blank    | P-0.3PG-E8- | 6325.851 | Eukaryotic initiation factor 4A-II (Fragment) OS=Homo sapiens OX=9606 GN=EIF4A2 PE=1 SV=1                                    |
| A0A7I2V45  | 1 | 1 | 5.2329  | 5.70E-09  | 3.29E-08 | 8.94242 | 1      | E8 blank    | P-0.3PG-E8- | 9233.405 | Heterogeneous nuclear ribonucleoprotein A1 (Fragment) OS=Homo sapiens OX=9606 GN=HNRNPA1 PE=1 SV=1                           |
| Q9UIE0     | 1 | 1 | 8.2296  | 1.23E-07  | 3.25E-07 | 13.9441 | 1      | P-0.3PG-E8- | E8 blank    | 56310.02 | Zinc finger protein 230 OS=Homo sapiens OX=9606 GN=ZNF230 PE=1 SV=3                                                          |
| G8JLA2     | 2 | 1 | 20.9332 | 2.17E-06  | 3.72E-06 | 1.65556 | 1      | F-0.3PG-E8- | E8 blank    | 17260.39 | Myosin light polypeptide 6 OS=Homo sapiens OX=9606 GN=MYL6 PE=1 SV=1                                                         |
| H0YBN0;Q8  | 1 | 1 | 11.2138 | 9.21E-09  | 4.46E-08 | 4.19333 | 1      | P-0.3PG-E8- | E8 blank    | 19778.42 | Vacuolar protein sorting-associated protein 37A (Fragment) OS=Homo sapiens OX=9606 GN=VPS37A PE=1 SV=1                       |



|            |   |   |         |           |          |          |        |              |              |          |                                                                                                              |
|------------|---|---|---------|-----------|----------|----------|--------|--------------|--------------|----------|--------------------------------------------------------------------------------------------------------------|
| J3KT77;Q9U | 1 | 1 | 4.5497  | 3.59E-05  | 4.91E-05 | 1.57537  | 1      | F-0.3PG-E8-3 | P-0.3PG-E8-3 | 19397.83 | DARPP-32 OS=Homo sapiens OX=9606 GN=PPP1R1B PE=1 SV=1                                                        |
| Q8N3L3     | 1 | 1 | 5.9152  | 2.29E-10  | 4.00E-09 | 7.18509  | 1      | P-0.3PG-E8-3 | E8 blank     | 77032.24 | Beta-taxilin OS=Homo sapiens OX=9606 GN=TXLNB PE=1 SV=3                                                      |
| O95409     | 1 | 1 | 4.8449  | 1.04E-08  | 4.89E-08 | 32.9373  | 1      | P-0.3PG-E8-3 | E8 blank     | 55633.25 | Zinc finger protein ZIC 2 OS=Homo sapiens OX=9606 GN=ZIC2 PE=1 SV=2                                          |
| H7C4K3     | 1 | 1 | 5.2135  | 1.16E-06  | 2.10E-06 | 27.2667  | 1      | P-0.3PG-E8-3 | E8 blank     | 85139.68 | Integrin beta OS=Homo sapiens OX=9606 GN=ITGB1 PE=1 SV=2                                                     |
| A0A5F9ZHV  | 1 | 1 | 6.278   | 0.7533287 | 0.753329 | 1.05187  | 0.0792 | F-0.3PG-E8-3 | P-0.3PG-E8-3 | 66369.49 | AF4/FMR2 family member 3 (Fragment) OS=Homo sapiens OX=9606 GN=AFF3 PE=1 SV=1                                |
| A0A087X25  | 1 | 1 | 9.966   | 0.2288902 | 0.23215  | 1.08216  | 0.2572 | P-0.3PG-E8-3 | E8 blank     | 87082.99 | Zinc finger protein 615 OS=Homo sapiens OX=9606 GN=ZNF615 PE=1 SV=1                                          |
| A0A0A0MS   | 1 | 1 | 4.5691  | 4.74E-11  | 1.40E-09 | 9.34406  | 1      | P-0.3PG-E8-3 | E8 blank     | 74535.74 | (E2-independent) E3 ubiquitin-conjugating enzyme FATS (Fragment) OS=Homo sapiens OX=9606 GN=C10orf90         |
| Q08752     | 1 | 1 | 4.9733  | 1.60E-09  | 1.39E-08 | 46.9054  | 1      | P-0.3PG-E8-3 | E8 blank     | 41162.82 | Peptidyl-prolyl cis-trans isomerase D OS=Homo sapiens OX=9606 GN=PPID PE=1 SV=3                              |
| Q04771     | 1 | 1 | 5.0536  | 4.66E-09  | 2.93E-08 | 7.86265  | 1      | E8 blank     | P-0.3PG-E8-3 | 58350.54 | Activin receptor type-1 OS=Homo sapiens OX=9606 GN=ACVR1 PE=1 SV=1                                           |
| P21675     | 1 | 1 | 5.8417  | 1.23E-07  | 3.25E-07 | 6.15537  | 1      | E8 blank     | F-0.3PG-E8-3 | 214103.3 | Transcription initiation factor TFIID subunit 1 OS=Homo sapiens OX=9606 GN=TAF1 PE=1 SV=2                    |
| B5MCV5     | 1 | 1 | 11.4562 | 4.21E-09  | 2.75E-08 | 20.7588  | 1      | P-0.3PG-E8-3 | E8 blank     | 23362.76 | Histone deacetylase 11 (Fragment) OS=Homo sapiens OX=9606 GN=HDAC11 PE=1 SV=1                                |
| A0A7P0T9L  | 1 | 1 | 5.6639  | 0.0002244 | 0.000278 | 2.02676  | 1      | E8 blank     | P-0.3PG-E8-3 | 77863.84 | Dystrobrevin alpha OS=Homo sapiens OX=9606 GN=DTNA PE=4 SV=1                                                 |
| F5GY68;F5H | 1 | 1 | 4.951   | 8.25E-09  | 4.17E-08 | 5.25041  | 1      | E8 blank     | F-0.3PG-E8-3 | 24827.75 | Anaphase-promoting complex subunit 5 (Fragment) OS=Homo sapiens OX=9606 GN=ANAPC5 PE=1 SV=1                  |
| A0A2R8Y46  | 1 | 1 | 6.2438  | 7.83E-09  | 4.08E-08 | 56.6509  | 1      | P-0.3PG-E8-3 | E8 blank     | 33500.69 | Serine/threonine-protein kinase B-raf OS=Homo sapiens OX=9606 GN=BRAF PE=1 SV=1                              |
| A0A0A6YYE  | 1 | 1 | 3.9039  | 1.52E-05  | 2.22E-05 | 1.84294  | 1      | E8 blank     | P-0.3PG-E8-3 | 57449.97 | Collybistin OS=Homo sapiens OX=9606 GN=ARHGEF9 PE=1 SV=1                                                     |
| Q96NW4     | 1 | 1 | 9.92    | 2.05E-05  | 2.95E-05 | 1.71415  | 1      | E8 blank     | P-0.3PG-E8-3 | 118809.1 | Ankyrin repeat domain-containing protein 27 OS=Homo sapiens OX=9606 GN=ANKRD27 PE=1 SV=2                     |
| Q9BQY9     | 1 | 1 | 10.9598 | 3.42E-07  | 7.46E-07 | 32.0912  | 1      | P-0.3PG-E8-3 | E8 blank     | 28127.12 | Dysbindin domain-containing protein 2 OS=Homo sapiens OX=9606 GN=DBNDD2 PE=1 SV=3                            |
| H0Y9C6;Q7  | 1 | 1 | 11.7664 | 5.97E-08  | 1.86E-07 | 4.82058  | 1      | E8 blank     | P-0.3PG-E8-3 | 17637.53 | Acyl-CoA dehydrogenase family member 11 (Fragment) OS=Homo sapiens OX=9606 GN=ACAD11 PE=1 SV=1               |
| A0A087WU   | 1 | 1 | 5.825   | 0.0026948 | 0.002994 | 2.23975  | 0.9876 | E8 blank     | P-0.3PG-E8-3 | 16799.93 | Transmembrane and coiled-coil domain-containing protein 3 (Fragment) OS=Homo sapiens OX=9606 GN=TMC3         |
| A0A087WY   | 1 | 1 | 5.5766  | 1.58E-07  | 3.92E-07 | Infinity | 1      | F-0.3PG-E8-3 | E8 blank     | 27336.6  | Laminin subunit alpha-5 (Fragment) OS=Homo sapiens OX=9606 GN=LAMA5 PE=1 SV=1                                |
| F5H0R1;Q9  | 1 | 1 | 4.3534  | 2.26E-07  | 5.32E-07 | 5.70837  | 1      | P-0.3PG-E8-3 | E8 blank     | 99804.08 | RNA-binding motif protein 21 OS=Homo sapiens OX=9606 GN=TUT1 PE=1 SV=1                                       |
| H7BYF4;O9  | 1 | 1 | 4.9883  | 1.21E-08  | 5.43E-08 | 3.33312  | 1      | P-0.3PG-E8-3 | E8 blank     | 13197.83 | UBX domain-containing protein 7 (Fragment) OS=Homo sapiens OX=9606 GN=UBXN7 PE=1 SV=1                        |
| F8VPF5;F8V | 1 | 1 | 10.898  | 0.0001322 | 0.000169 | 7.62872  | 1      | E8 blank     | F-0.3PG-E8-3 | 16897.84 | 5'-AMP-activated protein kinase subunit gamma-1 (Fragment) OS=Homo sapiens OX=9606 GN=PRKAG1 PE=1 SV=1       |
| B4DFF3;F6T | 1 | 1 | 5.6622  | 9.46E-10  | 9.47E-09 | 7.6013   | 1      | E8 blank     | P-0.3PG-E8-3 | 42091.5  | Battenin OS=Homo sapiens OX=9606 GN=CLN3 PE=1 SV=1                                                           |
| Q8NEP9     | 1 | 1 | 4.3381  | 0.0002343 | 0.00029  | 1.35061  | 1      | F-0.3PG-E8-3 | P-0.3PG-E8-3 | 75251.5  | Zinc finger protein 555 OS=Homo sapiens OX=9606 GN=ZNF555 PE=1 SV=4                                          |
| E9PPW0;Q9  | 1 | 1 | 4.5547  | 1.87E-07  | 4.52E-07 | 9.15227  | 1      | P-0.3PG-E8-3 | E8 blank     | 19486.73 | Transcription factor SOX-13 (Fragment) OS=Homo sapiens OX=9606 GN=SOX13 PE=1 SV=8                            |
| H0YML8;P7  | 1 | 1 | 4.712   | 0.0007319 | 0.000859 | 3.51887  | 0.9997 | P-0.3PG-E8-3 | E8 blank     | 27650.82 | Iroquois-class homeodomain protein IRX-5 OS=Homo sapiens OX=9606 GN=IRX5 PE=1 SV=1                           |
| Q8IYD1     | 1 | 1 | 9.8592  | 7.70E-10  | 8.11E-09 | 6.94182  | 1      | F-0.3PG-E8-3 | E8 blank     | 69510.64 | Eukaryotic peptide chain release factor GTP-binding subunit ERF3B OS=Homo sapiens OX=9606 GN=GSPT2 PE=1 SV=1 |
| G3V126;Q9  | 1 | 1 | 3.7094  | 8.83E-09  | 4.35E-08 | 7.45076  | 1      | E8 blank     | F-0.3PG-E8-3 | 52140.49 | V-type proton ATPase subunit H OS=Homo sapiens OX=9606 GN=ATP6V1H PE=1 SV=1                                  |
| D3DUJ3;K7  | 1 | 1 | 5.8714  | 1.26E-07  | 3.31E-07 | 5.07053  | 1      | P-0.3PG-E8-3 | E8 blank     | 36740.17 | Protein tyrosine phosphatase_ non-receptor type 2_ isoform CRA_d OS=Homo sapiens OX=9606 GN=PTPN2 PE=1 SV=1  |
| F8W978;Q9  | 1 | 1 | 5.2282  | 2.96E-08  | 1.05E-07 | 5.3501   | 1      | P-0.3PG-E8-3 | E8 blank     | 52821.77 | Cytochrome P450 4F11 OS=Homo sapiens OX=9606 GN=CYP4F11 PE=1 SV=1                                            |
| Q99496     | 1 | 1 | 4.854   | 0.0001565 | 0.000198 | 1.53008  | 1      | E8 blank     | F-0.3PG-E8-3 | 38111.66 | E3 ubiquitin-protein ligase RING2 OS=Homo sapiens OX=9606 GN=RNF2 PE=1 SV=1                                  |
| H3BS51;H3  | 1 | 1 | 10.4814 | 1.16E-07  | 3.14E-07 | 10.9053  | 1      | P-0.3PG-E8-3 | E8 blank     | 70413.37 | Sphingomyelin phosphodiesterase OS=Homo sapiens OX=9606 GN=SMPD3 PE=1 SV=1                                   |
| U3KQ61     | 1 | 1 | 6.0121  | 0.0018029 | 0.002053 | 1.18362  | 0.995  | E8 blank     | P-0.3PG-E8-3 | 3498.883 | M-phase phosphoprotein 9 (Fragment) OS=Homo sapiens OX=9606 GN=MPHOSPH9 PE=4 SV=1                            |
| A0A7P0Q1F  | 1 | 1 | 4.8463  | 2.45E-07  | 5.71E-07 | 4.70076  | 1      | E8 blank     | P-0.3PG-E8-3 | 149755.5 | Zinc finger protein 423 OS=Homo sapiens OX=9606 GN=ZNF423 PE=4 SV=1                                          |
| Q6UXG2     | 1 | 1 | 5.7511  | 2.01E-08  | 7.91E-08 | 12.6929  | 1      | E8 blank     | P-0.3PG-E8-3 | 114518.2 | Endosome/lysosome-associated apoptosis and autophagy regulator 1 OS=Homo sapiens OX=9606 GN=ELAPOR1          |
| F8W9S8;J3I | 1 | 1 | 9.1276  | 9.64E-08  | 2.78E-07 | 3.80685  | 1      | P-0.3PG-E8-3 | E8 blank     | 71106.35 | Lethal(3)malignant brain tumor-like protein 4 OS=Homo sapiens OX=9606 GN=L3MBTL4 PE=1 SV=1                   |
| O95985     | 1 | 1 | 9.9846  | 1.42E-08  | 6.11E-08 | 3.59703  | 1      | P-0.3PG-E8-3 | E8 blank     | 98601.08 | DNA topoisomerase 3-beta-1 OS=Homo sapiens OX=9606 GN=TOP3B PE=1 SV=1                                        |
| Q14974     | 1 | 1 | 8.7972  | 4.11E-08  | 1.36E-07 | 44.9224  | 1      | F-0.3PG-E8-3 | E8 blank     | 98482    | Importin subunit beta-1 OS=Homo sapiens OX=9606 GN=KPNB1 PE=1 SV=2                                           |
| M0R2Q5     | 1 | 1 | 4.1089  | 2.60E-08  | 9.79E-08 | 10.2193  | 1      | P-0.3PG-E8-3 | E8 blank     | 19537.98 | Fibrillin-3 (Fragment) OS=Homo sapiens OX=9606 GN=FBN3 PE=4 SV=1                                             |
| E7ENC7     | 1 | 1 | 6.4893  | 1.59E-07  | 3.93E-07 | 60.361   | 1      | P-0.3PG-E8-3 | E8 blank     | 4127.974 | Negative elongation factor E OS=Homo sapiens OX=9606 GN=NELFE PE=1 SV=1                                      |
| Q96QB1     | 1 | 1 | 4.5094  | 0.0122628 | 0.013189 | 2.86445  | 0.8694 | E8 blank     | P-0.3PG-E8-3 | 172302.5 | Rho GTPase-activating protein 7 OS=Homo sapiens OX=9606 GN=DLC1 PE=1 SV=4                                    |
| A0A1B0GX6  | 1 | 1 | 4.5769  | 2.89E-07  | 6.50E-07 | 5.11868  | 1      | F-0.3PG-E8-3 | E8 blank     | 19512.64 | Ubiquitin-conjugating enzyme E2 E3 (Fragment) OS=Homo sapiens OX=9606 GN=UBE2E3 PE=1 SV=1                    |
| Q63HQ2     | 1 | 1 | 5.516   | 1.10E-06  | 2.01E-06 | 2.58027  | 1      | F-0.3PG-E8-3 | E8 blank     | 113038.6 | Pikachurin OS=Homo sapiens OX=9606 GN=EGFLAM PE=1 SV=2                                                       |
| E7EX95;E9F | 1 | 1 | 5.9613  | 0.0997654 | 0.102813 | 1.15275  | 0.4313 | E8 blank     | F-0.3PG-E8-3 | 12942.23 | LIM domain-binding protein 2 OS=Homo sapiens OX=9606 GN=LDB2 PE=1 SV=1                                       |
| Q8IZS8     | 1 | 1 | 5.3937  | 6.03E-09  | 3.45E-08 | Infinity | 1      | E8 blank     | P-0.3PG-E8-3 | 124152.1 | Voltage-dependent calcium channel subunit alpha-2/delta-3 OS=Homo sapiens OX=9606 GN=CACNA2D3 PE=1 SV=1      |
| A0A6Q8PG   | 1 | 1 | 10.5474 | 1.29E-06  | 2.32E-06 | 6.59126  | 1      | E8 blank     | F-0.3PG-E8-3 | 82860.86 | Chloride channel protein OS=Homo sapiens OX=9606 GN=CLCN4 PE=1 SV=1                                          |
| P40426     | 1 | 1 | 4.5022  | 0.0230431 | 0.024536 | 12.0917  | 0.761  | P-0.3PG-E8-3 | E8 blank     | 47474.76 | Pre-B-cell leukemia transcription factor 3 OS=Homo sapiens OX=9606 GN=PBX3 PE=1 SV=1                         |
| K7EQS5;K7I | 1 | 1 | 5.509   | 0.0005147 | 0.000612 | 9.10777  | 0.9999 | F-0.3PG-E8-3 | E8 blank     | 11396.07 | CBP80/20-dependent translation initiation factor (Fragment) OS=Homo sapiens OX=9606 GN=CTIF PE=1 SV=1        |
| D6RIA1     | 1 | 1 | 4.9923  | 0.1020227 | 0.10497  | 5.51961  | 0.4262 | E8 blank     | F-0.3PG-E8-3 | 18270.46 | E3 SUMO-protein ligase ZNF451 (Fragment) OS=Homo sapiens OX=9606 GN=ZNF451 PE=1 SV=1                         |

|            |   |   |         |           |          |          |        |             |             |          |                                                                                                          |
|------------|---|---|---------|-----------|----------|----------|--------|-------------|-------------|----------|----------------------------------------------------------------------------------------------------------|
| H0YGT2;P2  | 1 | 1 | 5.6871  | 0.0012423 | 0.001427 | 228.883  | 0.9981 | F-0.3PG-E8- | E8 blank    | 13499.21 | Cation-dependent mannose-6-phosphate receptor (Fragment) OS=Homo sapiens OX=9606 GN=M6PR PE=1 SV=1       |
| A0A1W2PS   | 1 | 1 | 4.9987  | 2.00E-07  | 4.79E-07 | Infinity | 1      | F-0.3PG-E8- | E8 blank    | 56827.66 | Gap junction protein OS=Homo sapiens OX=9606 GN=GJA10 PE=1 SV=1                                          |
| P61978;Q5  | 1 | 1 | 4.4119  | 1.12E-07  | 3.08E-07 | 5.93625  | 1      | P-0.3PG-E8- | E8 blank    | 51261.48 | Heterogeneous nuclear ribonucleoprotein K OS=Homo sapiens OX=9606 GN=HNRNPK PE=1 SV=1                    |
| H7C4F9     | 1 | 1 | 5.7572  | 2.62E-05  | 3.69E-05 | 679.63   | 1      | F-0.3PG-E8- | E8 blank    | 9715.898 | Protein disulfide-isomerase A5 (Fragment) OS=Homo sapiens OX=9606 GN=PDIA5 PE=1 SV=1                     |
| E9PI60;Q9U | 1 | 1 | 5.1226  | 0.2945289 | 0.297312 | 1.34908  | 0.2119 | E8 blank    | F-0.3PG-E8- | 125824   | Bromodomain and PHD finger-containing protein 3 OS=Homo sapiens OX=9606 GN=BRPF3 PE=1 SV=1               |
| A0A0U1RR3  | 1 | 1 | 10.4818 | 3.36E-08  | 1.15E-07 | 19.156   | 1      | P-0.3PG-E8- | E8 blank    | 18481.58 | Histone H2A OS=Homo sapiens OX=9606 GN=hCG_2039566 PE=3 SV=1                                             |
| E9PD53;Q9  | 1 | 1 | 5.3806  | 2.82E-06  | 4.76E-06 | 40.8678  | 1      | E8 blank    | F-0.3PG-E8- | 145139.6 | Structural maintenance of chromosomes protein OS=Homo sapiens OX=9606 GN=SMC4 PE=1 SV=1                  |
| A0A494C0H  | 1 | 1 | 5.467   | 0.000253  | 0.000311 | 6.10614  | 1      | F-0.3PG-E8- | E8 blank    | 30730.5  | Immunoglobulin superfamily member 1 (Fragment) OS=Homo sapiens OX=9606 GN=IGSF1 PE=1 SV=1                |
| A0A087WZ   | 1 | 1 | 4.779   | 0.0011547 | 0.001336 | 1.54666  | 0.9985 | E8 blank    | P-0.3PG-E8- | 51388.03 | Cyclin-dependent kinase 16 OS=Homo sapiens OX=9606 GN=CDK16 PE=1 SV=1                                    |
| Q9UM13     | 1 | 1 | 4.9753  | 0.0010489 | 0.00122  | 8.71807  | 0.9989 | E8 blank    | P-0.3PG-E8- | 21423.25 | Anaphase-promoting complex subunit 10 OS=Homo sapiens OX=9606 GN=ANAPC10 PE=1 SV=1                       |
| A0A5F9ZGF  | 1 | 1 | 6.0104  | 6.28E-07  | 1.25E-06 | 202.959  | 1      | E8 blank    | P-0.3PG-E8- | 8557.355 | Activating signal cointegrator 1 complex subunit 1 OS=Homo sapiens OX=9606 GN=ASCC1 PE=1 SV=1            |
| P55347     | 1 | 1 | 11.0062 | 1.16E-07  | 3.14E-07 | 67.169   | 1      | P-0.3PG-E8- | E8 blank    | 48005.92 | Homeobox protein PKNOX1 OS=Homo sapiens OX=9606 GN=PKNOX1 PE=1 SV=3                                      |
| D6RBF8     | 1 | 1 | 4.2795  | 0.0001143 | 0.000147 | 70.786   | 1      | P-0.3PG-E8- | E8 blank    | 16762.4  | SRSF protein kinase 1 (Fragment) OS=Homo sapiens OX=9606 GN=SRPK1 PE=1 SV=1                              |
| E5RG30     | 1 | 1 | 4.632   | 1.46E-08  | 6.24E-08 | Infinity | 1      | P-0.3PG-E8- | E8 blank    | 7806.361 | Sorting nexin-16 (Fragment) OS=Homo sapiens OX=9606 GN=SNX16 PE=1 SV=1                                   |
| A0A5F9Z12  | 1 | 1 | 4.6208  | 0.0020033 | 0.002269 | 38.0871  | 0.9936 | F-0.3PG-E8- | E8 blank    | 127779.2 | Guanine nucleotide exchange factor H1 OS=Homo sapiens OX=9606 GN=ARHGEF2 PE=1 SV=1                       |
| Q13064     | 1 | 1 | 4.3974  | 2.18E-07  | 5.19E-07 | 52.2089  | 1      | E8 blank    | P-0.3PG-E8- | 56785.32 | Probable E3 ubiquitin-protein ligase makorin-3 OS=Homo sapiens OX=9606 GN=MKRN3 PE=1 SV=1                |
| B1AM48;Q   | 1 | 1 | 5.8687  | 8.38E-05  | 0.00011  | 22.1013  | 1      | E8 blank    | P-0.3PG-E8- | 20900.48 | ELAV-like protein (Fragment) OS=Homo sapiens OX=9606 GN=ELAVL2 PE=1 SV=1                                 |
| B4DTC4;C9  | 1 | 1 | 5.0837  | 0.2860229 | 0.289181 | 3.12009  | 0.217  | F-0.3PG-E8- | E8 blank    | 22113.16 | Polyhomeotic-like protein 3 OS=Homo sapiens OX=9606 GN=PHC3 PE=1 SV=1                                    |
| Q96EP0     | 1 | 1 | 5.1215  | 1.90E-06  | 3.31E-06 | Infinity | 1      | P-0.3PG-E8- | E8 blank    | 122731.6 | E3 ubiquitin-protein ligase RNF31 OS=Homo sapiens OX=9606 GN=RNF31 PE=1 SV=1                             |
| A0A5S8K7B  | 1 | 1 | 7.0335  | 0.0122386 | 0.013185 | 243.448  | 0.8697 | E8 blank    | F-0.3PG-E8- | 123924.6 | Protein CC2D2B OS=Homo sapiens OX=9606 GN=CC2D2B PE=4 SV=1                                               |
| E7ETK1     | 1 | 1 | 4.7019  | 0.0009284 | 0.001086 | 3.44257  | 0.9992 | F-0.3PG-E8- | P-0.3PG-E8- | 19106.68 | Enhancer of polycomb homolog (Fragment) OS=Homo sapiens OX=9606 GN=EPC2 PE=1 SV=1                        |
| A0A7P0T9B  | 1 | 1 | 5.1933  | 0.0017424 | 0.001991 | 2.21075  | 0.9954 | F-0.3PG-E8- | P-0.3PG-E8- | 204795.1 | ADAMTS-like protein 1 (Fragment) OS=Homo sapiens OX=9606 GN=ADAMTSL1 PE=4 SV=1                           |
| M0R0C0     | 1 | 1 | 4.3507  | 0.0003629 | 0.000438 | 2.14543  | 1      | F-0.3PG-E8- | P-0.3PG-E8- | 63368.4  | Endothelial zinc finger protein-induced by tumor necrosis factor alpha OS=Homo sapiens OX=9606 GN=ZNF711 |
| F5GWS9     | 1 | 1 | 6.3301  | 0.0003641 | 0.000439 | 12.5841  | 1      | E8 blank    | P-0.3PG-E8- | 8906.233 | Oral cancer overexpressed 1 OS=Homo sapiens OX=9606 GN=LTO1 PE=1 SV=1                                    |
| B3KUS5;Q7  | 1 | 1 | 5.5731  | 4.44E-06  | 7.17E-06 | 5.1448   | 1      | F-0.3PG-E8- | E8 blank    | 55907.38 | Ubiquitin carboxyl-terminal hydrolase OS=Homo sapiens OX=9606 GN=USP30 PE=1 SV=1                         |
| Q6AI08     | 1 | 1 | 4.1453  | 5.50E-05  | 7.44E-05 | 291.097  | 1      | E8 blank    | P-0.3PG-E8- | 130492.3 | HEAT repeat-containing protein 6 OS=Homo sapiens OX=9606 GN=HEATR6 PE=1 SV=1                             |
| F8VV52     | 1 | 1 | 3.9544  | 0.0333992 | 0.035328 | 1.45285  | 0.6833 | P-0.3PG-E8- | E8 blank    | 58791.8  | CCR4-NOT transcription complex subunit 2 (Fragment) OS=Homo sapiens OX=9606 GN=CNOT2 PE=1 SV=1           |
| A0A669KAX  | 1 | 1 | 5.6455  | 0.0002875 | 0.000352 | 2.31111  | 1      | F-0.3PG-E8- | P-0.3PG-E8- | 9299.269 | Aryl hydrocarbon receptor nuclear translocator-like protein 1 OS=Homo sapiens OX=9606 GN=ARNTL PE=4 SV=1 |
| O43763     | 1 | 1 | 6.0333  | 7.91E-05  | 0.000104 | 6.63334  | 1      | E8 blank    | P-0.3PG-E8- | 30308.53 | T-cell leukemia homeobox protein 2 OS=Homo sapiens OX=9606 GN=TLX2 PE=1 SV=2                             |
| Q9P2H3     | 1 | 1 | 3.4547  | 2.22E-10  | 4.00E-09 | Infinity | 1      | P-0.3PG-E8- | E8 blank    | 88719.32 | Intraflagellar transport protein 80 homolog OS=Homo sapiens OX=9606 GN=IFT80 PE=1 SV=3                   |
| C9J7L6;Q9H | 1 | 1 | 5.6483  | 1.24E-12  | 2.30E-10 | Infinity | 1      | E8 blank    | P-0.3PG-E8- | 11678.22 | Actin-related protein 8 (Fragment) OS=Homo sapiens OX=9606 GN=ACTR8 PE=1 SV=1                            |
| A0A0C4DG   | 1 | 1 | 5.503   | 0.0023135 | 0.002579 | 2.68548  | 0.9911 | E8 blank    | P-0.3PG-E8- | 4972.324 | Protein crumbs homolog 1 (Fragment) OS=Homo sapiens OX=9606 GN=CRB1 PE=4 SV=1                            |
| F5H514;H0  | 1 | 1 | 4.7121  | 4.58E-09  | 2.93E-08 | Infinity | 1      | P-0.3PG-E8- | E8 blank    | 91568.51 | RAS guanyl-releasing protein 1 OS=Homo sapiens OX=9606 GN=RASGRP1 PE=1 SV=2                              |
| H0YJ91     | 1 | 1 | 4.4919  | 1.14E-09  | 1.08E-08 | 7129301  | 1      | E8 blank    | P-0.3PG-E8- | 150692.7 | Pecanex-like protein (Fragment) OS=Homo sapiens OX=9606 GN=PCNX1 PE=1 SV=1                               |
| H7C4V3     | 1 | 1 | 5.3893  | 1.43E-06  | 2.55E-06 | 21.7044  | 1      | E8 blank    | P-0.3PG-E8- | 13160.01 | Ski-like protein (Fragment) OS=Homo sapiens OX=9606 GN=SKIL PE=1 SV=1                                    |
| B8ZZ17;Q6Z | 1 | 1 | 5.2245  | 0.3152758 | 0.317754 | 1.08476  | 0.2003 | F-0.3PG-E8- | E8 blank    | 129884.6 | Cation channel sperm-associated protein subunit gamma OS=Homo sapiens OX=9606 GN=CATSPERG PE=1 SV=1      |
| A0A087WZ   | 1 | 1 | 5.2014  | 0.375308  | 0.377665 | 1.31078  | 0.1721 | F-0.3PG-E8- | E8 blank    | 17368.96 | WW domain-containing oxidoreductase OS=Homo sapiens OX=9606 GN=WWOX PE=1 SV=1                            |
| A0A3B3IRY  | 1 | 1 | 4.6525  | 5.81E-05  | 7.80E-05 | 1.62885  | 1      | E8 blank    | P-0.3PG-E8- | 119572.9 | Receptor protein-tyrosine kinase OS=Homo sapiens OX=9606 GN=EPHB1 PE=1 SV=1                              |
| Q99856     | 1 | 1 | 5.4271  | 1.42E-07  | 3.59E-07 | 48.231   | 1      | E8 blank    | F-0.3PG-E8- | 62946.1  | AT-rich interactive domain-containing protein 3A OS=Homo sapiens OX=9606 GN=ARID3A PE=1 SV=2             |
| E9PC52;Q1  | 1 | 1 | 5.8093  | 3.63E-12  | 2.91E-10 | 482046   | 1      | P-0.3PG-E8- | E8 blank    | 47280.37 | Histone-binding protein RBBP7 OS=Homo sapiens OX=9606 GN=RBBP7 PE=1 SV=1                                 |
| Q6S5L8     | 1 | 1 | 5.0136  | 7.48E-07  | 1.45E-06 | 4.20274  | 1      | F-0.3PG-E8- | E8 blank    | 69868.59 | SHC-transforming protein 4 OS=Homo sapiens OX=9606 GN=SHC4 PE=1 SV=1                                     |
| O14990     | 1 | 1 | 5.1492  | 0.0004384 | 0.000525 | 2.66821  | 1      | E8 blank    | P-0.3PG-E8- | 22773.78 | Protein phosphatase inhibitor 2 family member C OS=Homo sapiens OX=9606 GN=PPP1R2C PE=1 SV=1             |
| F8WDL7     | 1 | 1 | 10.5038 | 8.01E-07  | 1.54E-06 | 2.38323  | 1      | F-0.3PG-E8- | E8 blank    | 12712.76 | Nucleolus and neural progenitor protein OS=Homo sapiens OX=9606 GN=NEPRO PE=1 SV=1                       |
| H0YAA4     | 1 | 1 | 5.2142  | 3.99E-08  | 1.33E-07 | 60.6035  | 1      | E8 blank    | P-0.3PG-E8- | 4149.739 | Zinc finger FYVE domain-containing protein 16 (Fragment) OS=Homo sapiens OX=9606 GN=ZFYVE16 PE=4 SV=1    |
| Q96NW7     | 1 | 1 | 8.263   | 7.98E-08  | 2.36E-07 | 26.694   | 1      | F-0.3PG-E8- | E8 blank    | 173835.7 | Leucine-rich repeat-containing protein 7 OS=Homo sapiens OX=9606 GN=LRRC7 PE=1 SV=1                      |
| Q9C0F3     | 1 | 1 | 4.9033  | 0.0012747 | 0.001462 | 4.74676  | 0.998  | F-0.3PG-E8- | E8 blank    | 55702.65 | Zinc finger protein 436 OS=Homo sapiens OX=9606 GN=ZNF436 PE=1 SV=2                                      |
| Q9HCE3     | 1 | 1 | 5.3442  | 2.92E-06  | 4.90E-06 | 12.4862  | 1      | P-0.3PG-E8- | E8 blank    | 144091.4 | Zinc finger protein 532 OS=Homo sapiens OX=9606 GN=ZNF532 PE=1 SV=2                                      |
| M9MMK7     | 1 | 1 | 9.8236  | 1.31E-07  | 3.39E-07 | 2.86257  | 1      | E8 blank    | P-0.3PG-E8- | 51233.78 | Dynein heavy chain 14_ axonemal OS=Homo sapiens OX=9606 GN=DNAH14 PE=1 SV=1                              |
| M0R1L6;Q8  | 1 | 1 | 5.1229  | 3.45E-06  | 5.75E-06 | 3.71233  | 1      | F-0.3PG-E8- | E8 blank    | 23852.63 | Zinc finger protein 563 (Fragment) OS=Homo sapiens OX=9606 GN=ZNF563 PE=1 SV=1                           |
| Q7Z340     | 1 | 1 | 4.3767  | 6.82E-08  | 2.09E-07 | 4.14636  | 1      | E8 blank    | F-0.3PG-E8- | 79796.11 | Zinc finger protein 551 OS=Homo sapiens OX=9606 GN=ZNF551 PE=1 SV=3                                      |



|             |   |   |         |           |          |          |        |             |             |          |                                                                                                           |
|-------------|---|---|---------|-----------|----------|----------|--------|-------------|-------------|----------|-----------------------------------------------------------------------------------------------------------|
| E9PLB6      | 1 | 1 | 6.4452  | 4.31E-10  | 6.00E-09 | 66.764   | 1      | P-0.3PG-E8- | E8 blank    | 8830.837 | DENN domain-containing protein 2B (Fragment) OS=Homo sapiens OX=9606 GN=DENND2B PE=1 SV=1                 |
| A0A590UJN   | 1 | 1 | 4.9776  | 3.76E-06  | 6.20E-06 | 1.95686  | 1      | F-0.3PG-E8- | E8 blank    | 67810.38 | Enhancer of polycomb homolog OS=Homo sapiens OX=9606 GN=EPC1 PE=1 SV=1                                    |
| P49006      | 1 | 1 | 5.2578  | 1.78E-06  | 3.13E-06 | 10.9934  | 1      | P-0.3PG-E8- | E8 blank    | 19585.84 | MARCKS-related protein OS=Homo sapiens OX=9606 GN=MARCKSL1 PE=1 SV=2                                      |
| B4DXZ6;E7   | 1 | 1 | 4.4514  | 0.0001476 | 0.000188 | 1.5765   | 1      | F-0.3PG-E8- | P-0.3PG-E8- | 68669.49 | Fragile X mental retardation syndrome-related protein 1 OS=Homo sapiens OX=9606 GN=FXR1 PE=1 SV=1         |
| A0A6Q8PG    | 1 | 1 | 4.2058  | 7.70E-07  | 1.49E-06 | 3.91207  | 1      | E8 blank    | P-0.3PG-E8- | 200999.3 | Sodium channel protein OS=Homo sapiens OX=9606 GN=SCN11A PE=3 SV=1                                        |
| C9JRQ0      | 1 | 1 | 12.6568 | 0.0002886 | 0.000352 | 6.41626  | 1      | P-0.3PG-E8- | E8 blank    | 15922.68 | Suppressor of tumorigenicity 7 protein (Fragment) OS=Homo sapiens OX=9606 GN=ST7 PE=1 SV=1                |
| A8MWA4      | 1 | 1 | 4.3371  | 9.49E-07  | 1.79E-06 | 2.58956  | 1      | F-0.3PG-E8- | E8 blank    | 35552.16 | Putative zinc finger protein 705E OS=Homo sapiens OX=9606 GN=ZNF705E PE=3 SV=2                            |
| Q9NUZ1      | 1 | 1 | 5.1365  | 6.34E-07  | 1.25E-06 | 2.39993  | 1      | E8 blank    | F-0.3PG-E8- | 62422.92 | Acyl-coenzyme A oxidase-like protein OS=Homo sapiens OX=9606 GN=ACOXL PE=2 SV=3                           |
| O95197      | 1 | 1 | 4.5099  | 0.0426342 | 0.044874 | 1.68614  | 0.6285 | F-0.3PG-E8- | E8 blank    | 113238.5 | Reticulon-3 OS=Homo sapiens OX=9606 GN=RTN3 PE=1 SV=2                                                     |
| A0A494C0G   | 1 | 1 | 5.4749  | 0.0006275 | 0.000743 | 244.479  | 0.9998 | P-0.3PG-E8- | E8 blank    | 58003.28 | Sodium channel and clathrin linker 1 OS=Homo sapiens OX=9606 GN=SCLT1 PE=1 SV=1                           |
| K7EMR1      | 1 | 1 | 4.6131  | 5.04E-05  | 6.86E-05 | 107.132  | 1      | P-0.3PG-E8- | E8 blank    | 19381.5  | Progranulin (Fragment) OS=Homo sapiens OX=9606 GN=GRN PE=1 SV=1                                           |
| P02652;V9   | 1 | 1 | 11.3136 | 5.89E-06  | 9.21E-06 | 11.3582  | 1      | E8 blank    | F-0.3PG-E8- | 11289.09 | Apolipoprotein A-II OS=Homo sapiens OX=9606 GN=APOA2 PE=1 SV=1                                            |
| Q9HCC9      | 1 | 1 | 4.7321  | 3.76E-07  | 8.07E-07 | 7.34765  | 1      | F-0.3PG-E8- | E8 blank    | 98315.37 | Lateral signaling target protein 2 homolog OS=Homo sapiens OX=9606 GN=ZFYVE28 PE=1 SV=3                   |
| Q9BX82      | 1 | 1 | 4.3748  | 0.0001938 | 0.000241 | 5.48787  | 1      | P-0.3PG-E8- | E8 blank    | 75119.04 | Zinc finger protein 471 OS=Homo sapiens OX=9606 GN=ZNF471 PE=2 SV=1                                       |
| Q5R372      | 1 | 1 | 4.4798  | 0.0294352 | 0.031238 | 1.45889  | 0.7107 | P-0.3PG-E8- | E8 blank    | 93425.53 | Rab GTPase-activating protein 1-like OS=Homo sapiens OX=9606 GN=RABGAP1L PE=1 SV=1                        |
| Q08397      | 1 | 1 | 4.7259  | 2.62E-05  | 3.69E-05 | 5.40546  | 1      | P-0.3PG-E8- | E8 blank    | 63794.14 | Lysyl oxidase homolog 1 OS=Homo sapiens OX=9606 GN=LOXL1 PE=1 SV=2                                        |
| B4DWF2      | 1 | 1 | 4.9075  | 2.34E-08  | 8.99E-08 | 9.95652  | 1      | E8 blank    | P-0.3PG-E8- | 61458.48 | Zinc finger protein Helios OS=Homo sapiens OX=9606 GN=IKZF2 PE=1 SV=1                                     |
| Q8NFN8      | 1 | 1 | 4.5085  | 0.0001511 | 0.000192 | 3.65298  | 1      | F-0.3PG-E8- | E8 blank    | 90465.89 | Probable G-protein coupled receptor 156 OS=Homo sapiens OX=9606 GN=GPR156 PE=2 SV=2                       |
| B1AMX8;Q    | 1 | 1 | 4.4708  | 3.18E-07  | 7.09E-07 | Infinity | 1      | F-0.3PG-E8- | E8 blank    | 22103.63 | TNF receptor-associated factor 2 (Fragment) OS=Homo sapiens OX=9606 GN=TRAF2 PE=1 SV=1                    |
| A4QPE4      | 1 | 1 | 5.3434  | 1.61E-11  | 8.49E-10 | Infinity | 1      | F-0.3PG-E8- | E8 blank    | 106180   | SPTBN2 protein OS=Homo sapiens OX=9606 GN=SPTBN2 PE=1 SV=1                                                |
| F8W6D1;Q    | 1 | 1 | 10.3436 | 1.00E-05  | 1.50E-05 | 7.5144   | 1      | F-0.3PG-E8- | E8 blank    | 36893.01 | E3 ubiquitin-protein ligase RNF216 OS=Homo sapiens OX=9606 GN=RNF216 PE=1 SV=1                            |
| C9JMU2      | 1 | 1 | 10.4872 | 2.81E-06  | 4.76E-06 | 34.2808  | 1      | P-0.3PG-E8- | E8 blank    | 6658.126 | WW domain-containing adapter protein with coiled-coil (Fragment) OS=Homo sapiens OX=9606 GN=WAC PE=       |
| Q9Y6I4      | 1 | 1 | 10.7352 | 3.46E-06  | 5.75E-06 | 102.211  | 1      | E8 blank    | P-0.3PG-E8- | 60493.9  | Ubiquitin carboxyl-terminal hydrolase 3 OS=Homo sapiens OX=9606 GN=USP3 PE=1 SV=2                         |
| I3L0K7;I3L2 | 1 | 1 | 4.3032  | 1.53E-10  | 3.17E-09 | 6.94194  | 1      | E8 blank    | F-0.3PG-E8- | 57448.06 | Heat shock protein 75 kDa_ mitochondrial OS=Homo sapiens OX=9606 GN=TRAP1 PE=1 SV=1                       |
| C9JDL7;HOY  | 1 | 1 | 5.1636  | 4.49E-07  | 9.34E-07 | 12.5382  | 1      | P-0.3PG-E8- | E8 blank    | 10946.73 | RING finger protein 215 (Fragment) OS=Homo sapiens OX=9606 GN=RNF215 PE=1 SV=8                            |
| A0A0C4DG    | 1 | 1 | 4.5879  | 0.0004173 | 0.000501 | 276.689  | 1      | P-0.3PG-E8- | E8 blank    | 32713.47 | Sorting nexin-29 (Fragment) OS=Homo sapiens OX=9606 GN=SNX29 PE=1 SV=1                                    |
| F5H2H9      | 1 | 1 | 5.491   | 7.99E-07  | 1.54E-06 | 9.67916  | 1      | E8 blank    | P-0.3PG-E8- | 18421.19 | Activating transcription factor 7-interacting protein 1 (Fragment) OS=Homo sapiens OX=9606 GN=ATF7IP PE=1 |
| A0A1W2PP    | 1 | 1 | 5.4211  | 2.65E-09  | 1.83E-08 | 78.3388  | 1      | P-0.3PG-E8- | E8 blank    | 46455.41 | Cytoplasmic polyadenylated homeobox-like OS=Homo sapiens OX=9606 GN=CPHXL PE=3 SV=1                       |
| O75081      | 2 | 1 | 9.9109  | 4.37E-08  | 1.42E-07 | 12.5804  | 1      | P-0.3PG-E8- | E8 blank    | 72161.6  | Protein CBFA2T3 OS=Homo sapiens OX=9606 GN=CBFA2T3 PE=1 SV=2                                              |
| Q8NA42;K7   | 2 | 1 | 14.1295 | 0.0516343 | 0.053905 | 1.50734  | 0.5843 | P-0.3PG-E8- | F-0.3PG-E8- | 56323.82 | Zinc finger protein 383 OS=Homo sapiens OX=9606 GN=ZNF383 PE=1 SV=1                                       |
| MOQZA6;M    | 2 | 1 | 11.6437 | 0.0435054 | 0.045716 | 1.09898  | 0.6239 | E8 blank    | P-0.3PG-E8- | 13039.47 | Zinc finger protein 415 (Fragment) OS=Homo sapiens OX=9606 GN=ZNF415 PE=1 SV=1                            |
| H0Y8C6;O0   | 2 | 1 | 8.8895  | 0.3963193 | 0.398183 | 1.27892  | 0.1637 | P-0.3PG-E8- | E8 blank    | 125288.3 | Importin-5 (Fragment) OS=Homo sapiens OX=9606 GN=IPO5 PE=1 SV=1                                           |
| A0A7P0T8C   | 2 | 1 | 9.9007  | 4.75E-07  | 9.78E-07 | 10.77    | 1      | E8 blank    | P-0.3PG-E8- | 54709.48 | Protein disulfide-isomerase OS=Homo sapiens OX=9606 GN=P4HB PE=4 SV=1                                     |
| O95235      | 2 | 1 | 15.1476 | 1.34E-08  | 5.87E-08 | 31.7698  | 1      | P-0.3PG-E8- | E8 blank    | 101304.6 | Kinesin-like protein KIF20A OS=Homo sapiens OX=9606 GN=KIF20A PE=1 SV=1                                   |
| A0A2R8Y4V   | 2 | 1 | 9.5288  | 0.000696  | 0.00082  | 5.73255  | 0.9997 | E8 blank    | P-0.3PG-E8- | 93093.8  | Epidermal growth factor receptor kinase substrate 8 OS=Homo sapiens OX=9606 GN=EPS8 PE=1 SV=1             |
| Q7Z3Y9      | 2 | 1 | 16.9213 | 3.30E-07  | 7.26E-07 | 7.77569  | 1      | E8 blank    | P-0.3PG-E8- | 52652.07 | Keratin_ type I cytoskeletal 26 OS=Homo sapiens OX=9606 GN=KRT26 PE=1 SV=2                                |
| B0QZ19      | 1 | 1 | 6.1892  | 6.04E-05  | 8.06E-05 | Infinity | 1      | E8 blank    | P-0.3PG-E8- | 7613.959 | PHD finger protein 20 (Fragment) OS=Homo sapiens OX=9606 GN=PHF20 PE=4 SV=1                               |
| Q9BTA9;C9   | 2 | 1 | 9.7715  | 7.48E-05  | 9.90E-05 | 4.52457  | 1      | F-0.3PG-E8- | E8 blank    | 71066.53 | WW domain-containing adapter protein with coiled-coil OS=Homo sapiens OX=9606 GN=WAC PE=1 SV=3            |
| F8WA39;Q    | 2 | 1 | 9.3883  | 0.0361346 | 0.038159 | 1.1522   | 0.6659 | F-0.3PG-E8- | P-0.3PG-E8- | 76459.46 | Phosphatidylinositol-3_5-bisphosphate 3-phosphatase OS=Homo sapiens OX=9606 GN=MTMR1 PE=1 SV=1            |
| O94782      | 2 | 1 | 9.4114  | 0.000104  | 0.000134 | 14.3534  | 1      | P-0.3PG-E8- | E8 blank    | 89233.84 | Ubiquitin carboxyl-terminal hydrolase 1 OS=Homo sapiens OX=9606 GN=USP1 PE=1 SV=1                         |
| B5MCT2;C9   | 2 | 1 | 16.2549 | 6.61E-10  | 7.30E-09 | 9.65299  | 1      | P-0.3PG-E8- | E8 blank    | 57194.88 | ETS translocation variant 1 OS=Homo sapiens OX=9606 GN=ETV1 PE=1 SV=2                                     |
| A0A494C0U   | 2 | 1 | 12.1841 | 2.68E-07  | 6.16E-07 | 5.32449  | 1      | F-0.3PG-E8- | E8 blank    | 131786.6 | Tripeptidyl-peptidase 2 (Fragment) OS=Homo sapiens OX=9606 GN=TPP2 PE=1 SV=1                              |
| A0A494C04   | 2 | 1 | 12.3712 | 8.41E-07  | 1.61E-06 | 7.22191  | 1      | E8 blank    | F-0.3PG-E8- | 84505.86 | Serine/threonine-protein kinase TBK1 OS=Homo sapiens OX=9606 GN=TBK1 PE=1 SV=1                            |
| H3BUL7      | 2 | 1 | 11.0298 | 3.53E-06  | 5.85E-06 | 2.36403  | 1      | E8 blank    | P-0.3PG-E8- | 2368.567 | E3 SUMO-protein ligase PIAS1 OS=Homo sapiens OX=9606 GN=PIAS1 PE=4 SV=1                                   |
| A0A0A0MT    | 2 | 1 | 18.5645 | 1.27E-09  | 1.17E-08 | 65.9994  | 1      | P-0.3PG-E8- | E8 blank    | 48313.24 | NADPH:adrenodoxin oxidoreductase_ mitochondrial OS=Homo sapiens OX=9606 GN=FDXR PE=1 SV=1                 |
| A0A087X0V   | 2 | 1 | 11.4896 | 7.41E-08  | 2.24E-07 | 16.8852  | 1      | P-0.3PG-E8- | E8 blank    | 75087.83 | 2'-5' oligoadenylate synthase (Fragment) OS=Homo sapiens OX=9606 GN=OAS2 PE=1 SV=2                        |
| P33241      | 2 | 1 | 20.2082 | 1.30E-10  | 2.86E-09 | 181.149  | 1      | P-0.3PG-E8- | E8 blank    | 37419.73 | Lymphocyte-specific protein 1 OS=Homo sapiens OX=9606 GN=LSP1 PE=1 SV=1                                   |
| A0A7P0Z49   | 2 | 1 | 15.0995 | 0.006435  | 0.007015 | 1.21141  | 0.9425 | P-0.3PG-E8- | E8 blank    | 71975.4  | E3 ubiquitin-protein ligase NEDD4-like (Fragment) OS=Homo sapiens OX=9606 GN=NEDD4L PE=4 SV=1             |
| H0Y519      | 2 | 1 | 15.9397 | 1.56E-05  | 2.27E-05 | 2.40011  | 1      | E8 blank    | F-0.3PG-E8- | 9338.177 | Guanine nucleotide exchange factor DBS (Fragment) OS=Homo sapiens OX=9606 GN=MCF2L PE=1 SV=1              |
| H3BUY5      | 2 | 1 | 10.0712 | 1.35E-07  | 3.46E-07 | 52.8318  | 1      | P-0.3PG-E8- | E8 blank    | 28745.53 | RNA-binding motif protein_ X chromosome OS=Homo sapiens OX=9606 GN=RBMX PE=1 SV=1                         |

|            |   |   |         |           |          |          |        |             |             |          |                                                                                                        |
|------------|---|---|---------|-----------|----------|----------|--------|-------------|-------------|----------|--------------------------------------------------------------------------------------------------------|
| MOR283     | 2 | 1 | 11.8622 | 5.18E-05  | 7.02E-05 | 2.77888  | 1      | E8 blank    | P-0.3PG-E8- | 13106.76 | RAC-beta serine/threonine-protein kinase (Fragment) OS=Homo sapiens OX=9606 GN=AKT2 PE=1 SV=1          |
| Q9BZF3     | 2 | 1 | 10.3468 | 0.0079928 | 0.008684 | 47.6677  | 0.9222 | P-0.3PG-E8- | E8 blank    | 107446.7 | Oxysterol-binding protein-related protein 6 OS=Homo sapiens OX=9606 GN=OSBPL6 PE=1 SV=1                |
| Q14112;A0  | 2 | 1 | 9.3342  | 4.98E-09  | 2.98E-08 | 15.6202  | 1      | F-0.3PG-E8- | E8 blank    | 154048.2 | Nidogen-2 OS=Homo sapiens OX=9606 GN=NID2 PE=1 SV=3                                                    |
| H7BYU6;J3  | 2 | 1 | 9.9863  | 7.14E-06  | 1.10E-05 | 12.1828  | 1      | F-0.3PG-E8- | E8 blank    | 143940.2 | Zinc finger protein 521 OS=Homo sapiens OX=9606 GN=ZNF521 PE=1 SV=2                                    |
| A0A0C3SFZ  | 1 | 1 | 10.5028 | 5.81E-07  | 1.17E-06 | 4.1023   | 1      | P-0.3PG-E8- | E8 blank    | 119887.2 | Histone-lysine N-methyltransferase MECOM OS=Homo sapiens OX=9606 GN=MECOM PE=1 SV=1                    |
| O60290     | 2 | 1 | 14.7621 | 6.87E-06  | 1.06E-05 | 58.9284  | 1      | E8 blank    | P-0.3PG-E8- | 133422.3 | Zinc finger protein 862 OS=Homo sapiens OX=9606 GN=ZNF862 PE=2 SV=2                                    |
| F5H026;M0  | 2 | 1 | 16.8992 | 0.0040018 | 0.004407 | 1.32693  | 0.9733 | F-0.3PG-E8- | E8 blank    | 14551.66 | Zinc finger protein 880 OS=Homo sapiens OX=9606 GN=ZNF880 PE=4 SV=1                                    |
| A0A1B0GV   | 2 | 1 | 20.1852 | 1.70E-08  | 7.00E-08 | 10.6807  | 1      | P-0.3PG-E8- | E8 blank    | 141616.7 | HECT-type E3 ubiquitin transferase OS=Homo sapiens OX=9606 GN=NEDD4L PE=1 SV=1                         |
| A0A7I2V2J0 | 2 | 1 | 9.4057  | 2.90E-08  | 1.04E-07 | Infinity | 1      | P-0.3PG-E8- | E8 blank    | 131723   | Laminin subunit beta-1 OS=Homo sapiens OX=9606 GN=LAMB1 PE=1 SV=1                                      |
| F1T0E5;Q9  | 2 | 1 | 9.7061  | 1.28E-07  | 3.34E-07 | 8.17776  | 1      | P-0.3PG-E8- | E8 blank    | 153085.3 | Calcium-dependent secretion activator 1 OS=Homo sapiens OX=9606 GN=CADPS PE=1 SV=1                     |
| Q9NUC0     | 2 | 1 | 15.09   | 0.0002707 | 0.000332 | 6.19298  | 1      | F-0.3PG-E8- | P-0.3PG-E8- | 40089.54 | SERTA domain-containing protein 4 OS=Homo sapiens OX=9606 GN=SERTAD4 PE=1 SV=1                         |
| Q9UBZ9     | 2 | 1 | 8.5983  | 7.64E-08  | 2.27E-07 | 3.98618  | 1      | P-0.3PG-E8- | E8 blank    | 139445.8 | DNA repair protein REV1 OS=Homo sapiens OX=9606 GN=REV1 PE=1 SV=1                                      |
| A0A087WS   | 2 | 1 | 11.4755 | 1.13E-05  | 1.68E-05 | 3.06136  | 1      | F-0.3PG-E8- | E8 blank    | 60820.38 | Thioredoxin-disulfide reductase OS=Homo sapiens OX=9606 GN=TXNRD1 PE=1 SV=1                            |
| Q9UHB9     | 2 | 1 | 13.9876 | 2.43E-10  | 4.09E-09 | 11.0265  | 1      | P-0.3PG-E8- | E8 blank    | 71242.96 | Signal recognition particle subunit SRP68 OS=Homo sapiens OX=9606 GN=SRP68 PE=1 SV=2                   |
| D2WEZ3     | 2 | 1 | 12.6116 | 6.01E-05  | 8.05E-05 | Infinity | 1      | F-0.3PG-E8- | E8 blank    | 99703.08 | Neurogenic locus notch homolog protein 2 OS=Homo sapiens OX=9606 GN=NOTCH2 PE=1 SV=1                   |
| P22735     | 2 | 1 | 14.1758 | 0.0365708 | 0.038556 | 1.84052  | 0.6632 | E8 blank    | P-0.3PG-E8- | 90585.24 | Protein-glutamine gamma-glutamyltransferase K OS=Homo sapiens OX=9606 GN=TGM1 PE=1 SV=4                |
| H3BRW8;Q   | 2 | 1 | 9.752   | 0.0476621 | 0.049921 | 1.37159  | 0.6029 | F-0.3PG-E8- | P-0.3PG-E8- | 25188.52 | Calcium-binding and coiled-coil domain-containing protein 1 (Fragment) OS=Homo sapiens OX=9606 GN=CALC |
| Q9ULG6;H3  | 2 | 1 | 25.4804 | 4.01E-10  | 5.71E-09 | 119.209  | 1      | P-0.3PG-E8- | E8 blank    | 88081.83 | Cell cycle progression protein 1 OS=Homo sapiens OX=9606 GN=CCPG1 PE=1 SV=3                            |
| Q9UKI8;B3  | 2 | 1 | 14.1661 | 6.17E-09  | 3.47E-08 | 3.36382  | 1      | E8 blank    | P-0.3PG-E8- | 87270.03 | Serine/threonine-protein kinase tousled-like 1 OS=Homo sapiens OX=9606 GN=TLK1 PE=1 SV=2               |
| Q96ST3;H3  | 3 | 1 | 21.2325 | 8.66E-09  | 4.31E-08 | 8.10087  | 1      | P-0.3PG-E8- | E8 blank    | 145973.7 | Paired amphipathic helix protein Sin3a OS=Homo sapiens OX=9606 GN=SIN3A PE=1 SV=2                      |
| A0A7I2YQJ2 | 3 | 1 | 22.039  | 1.02E-07  | 2.91E-07 | 2.90614  | 1      | E8 blank    | P-0.3PG-E8- | 9290.105 | Heterogeneous nuclear ribonucleoprotein A1 (Fragment) OS=Homo sapiens OX=9606 GN=HNRNPA1 PE=1 SV=      |
| A0A0C4DFN  | 3 | 1 | 18.629  | 4.88E-07  | 1.00E-06 | 60.6846  | 1      | P-0.3PG-E8- | E8 blank    | 188218.4 | Terminal uridylyltransferase 4 OS=Homo sapiens OX=9606 GN=TUT4 PE=1 SV=1                               |
| H0Y8B3;Q9  | 3 | 1 | 22.8286 | 4.15E-08  | 1.36E-07 | 18.0385  | 1      | F-0.3PG-E8- | E8 blank    | 59145.26 | Adenosylhomocysteinase 3 (Fragment) OS=Homo sapiens OX=9606 GN=AHCYL2 PE=1 SV=1                        |
| Q8N2N9     | 4 | 1 | 22.6414 | 0.0454781 | 0.047711 | 1.41123  | 0.6137 | E8 blank    | P-0.3PG-E8- | 155122.4 | Ankyrin repeat domain-containing protein 36B OS=Homo sapiens OX=9606 GN=ANKRD36B PE=1 SV=4             |
| A0A0A0MR   | 4 | 1 | 19.0237 | 2.53E-05  | 3.58E-05 | 2.76316  | 1      | F-0.3PG-E8- | E8 blank    | 102744.3 | Band 4.1-like protein 3 OS=Homo sapiens OX=9606 GN=EPB41L3 PE=1 SV=1                                   |
| Q8NDV7     | 4 | 1 | 29.8896 | 0.0088165 | 0.009546 | 116.635  | 0.9117 | F-0.3PG-E8- | E8 blank    | 211095.9 | Trinucleotide repeat-containing gene 6A protein OS=Homo sapiens OX=9606 GN=TNRC6A PE=1 SV=2            |
| P08910     | 3 | 1 | 16.7412 | 0.0001515 | 0.000192 | 9.19183  | 1      | P-0.3PG-E8- | E8 blank    | 49113.39 | Monoacylglycerol lipase ABHD2 OS=Homo sapiens OX=9606 GN=ABHD2 PE=1 SV=1                               |
| A0A1W2PR   | 4 | 1 | 46.9769 | 9.83E-08  | 2.83E-07 | 42.0107  | 1      | P-0.3PG-E8- | E8 blank    | 57530.8  | Glial fibrillary acidic protein OS=Homo sapiens OX=9606 GN=GFAP PE=1 SV=1                              |
| Q13360;K7  | 4 | 1 | 25.523  | 3.29E-07  | 7.26E-07 | 17.4764  | 1      | P-0.3PG-E8- | E8 blank    | 56378.42 | Zinc finger protein 177 OS=Homo sapiens OX=9606 GN=ZNF177 PE=1 SV=4                                    |
| Q5JPF3;A0  | 4 | 1 | 32.4436 | 8.73E-11  | 2.00E-09 | 32.2805  | 1      | P-0.3PG-E8- | E8 blank    | 201516.2 | Ankyrin repeat domain-containing protein 36C OS=Homo sapiens OX=9606 GN=ANKRD36C PE=1 SV=3             |
| Q13009     | 4 | 1 | 22.4686 | 9.07E-05  | 0.000118 | 1.84788  | 1      | P-0.3PG-E8- | E8 blank    | 178820   | Rho guanine nucleotide exchange factor TIAM1 OS=Homo sapiens OX=9606 GN=TIAM1 PE=1 SV=2                |
| A0A087WV   | 6 | 1 | 39.8088 | 0.0020752 | 0.002338 | 1.56194  | 0.993  | F-0.3PG-E8- | E8 blank    | 25214.08 | Bromodomain adjacent to zinc finger domain protein 1A (Fragment) OS=Homo sapiens OX=9606 GN=BAZ1A PE=  |
| A0A2R8YD   | 7 | 1 | 42.9861 | 4.42E-08  | 1.43E-07 | 3.44971  | 1      | E8 blank    | P-0.3PG-E8- | 171503.1 | DNA helicase (Fragment) OS=Homo sapiens OX=9606 GN=CHD4 PE=1 SV=1                                      |
| A0A2R8Y8C  | 8 | 1 | 47.8721 | 9.68E-06  | 1.45E-05 | 2.88094  | 1      | E8 blank    | F-0.3PG-E8- | 190869   | DNA helicase (Fragment) OS=Homo sapiens OX=9606 GN=CHD4 PE=1 SV=1                                      |
| Q9NRL2     | 9 | 1 | 60.2804 | 0.1548226 | 0.157526 | 6.29499  | 0.335  | E8 blank    | P-0.3PG-E8- | 180356.4 | Bromodomain adjacent to zinc finger domain protein 1A OS=Homo sapiens OX=9606 GN=BAZ1A PE=1 SV=2       |
| H0YCD1     | 4 | 1 | 22.7868 | 0.0001602 | 0.000202 | 1.63461  | 1      | E8 blank    | F-0.3PG-E8- | 22830.69 | Adenylate kinase 9 (Fragment) OS=Homo sapiens OX=9606 GN=AK9 PE=1 SV=8                                 |
| Q3T906     | 2 | 1 | 8.9015  | 0.0019969 | 0.002266 | 1.54112  | 0.9936 | E8 blank    | P-0.3PG-E8- | 144876.7 | N-acetylglucosamine-1-phosphotransferase subunits alpha/beta OS=Homo sapiens OX=9606 GN=GNPTAB PE=     |
| H0Y9K7;H0  | 3 | 1 | 23.4083 | 5.18E-06  | 8.22E-06 | Infinity | 1      | E8 blank    | F-0.3PG-E8- | 26419.74 | Splicing factor_ proline- and glutamine-rich (Fragment) OS=Homo sapiens OX=9606 GN=SFPQ PE=1 SV=1      |
| A0A2R8Y5F  | 3 | 1 | 12.2668 | 2.16E-08  | 8.40E-08 | Infinity | 1      | P-0.3PG-E8- | E8 blank    | 195029.8 | Tuberin OS=Homo sapiens OX=9606 GN=TSC2 PE=1 SV=1                                                      |
| Q14790     | 2 | 1 | 12.9515 | 0.0320876 | 0.033997 | 15.2212  | 0.6921 | F-0.3PG-E8- | E8 blank    | 56132.58 | Caspase-8 OS=Homo sapiens OX=9606 GN=CASP8 PE=1 SV=1                                                   |
| A0A1W2PS   | 2 | 1 | 23.4184 | 5.43E-08  | 1.72E-07 | 3.50406  | 1      | E8 blank    | P-0.3PG-E8- | 7470.47  | Glial fibrillary acidic protein (Fragment) OS=Homo sapiens OX=9606 GN=GFAP PE=1 SV=1                   |
| P19013     | 2 | 1 | 21.789  | 2.66E-08  | 9.82E-08 | 9.89731  | 1      | P-0.3PG-E8- | E8 blank    | 56543.31 | Keratin_ type II cytoskeletal 4 OS=Homo sapiens OX=9606 GN=KRT4 PE=1 SV=5                              |
| Q6KB66     | 2 | 1 | 21.6193 | 0.0001415 | 0.00018  | 277.781  | 1      | P-0.3PG-E8- | E8 blank    | 51038.63 | Keratin_ type II cytoskeletal 80 OS=Homo sapiens OX=9606 GN=KRT80 PE=1 SV=2                            |
| P08729     | 2 | 1 | 29.5478 | 2.87E-08  | 1.04E-07 | 2.82946  | 1      | E8 blank    | P-0.3PG-E8- | 51442.77 | Keratin_ type II cytoskeletal 7 OS=Homo sapiens OX=9606 GN=KRT7 PE=1 SV=5                              |
| Q13867;K7  | 2 | 1 | 13.6749 | 3.24E-07  | 7.18E-07 | 5.50428  | 1      | F-0.3PG-E8- | E8 blank    | 53189.66 | Bleomycin hydrolase OS=Homo sapiens OX=9606 GN=BLMH PE=1 SV=1                                          |
| Q9Y247     | 2 | 1 | 16.5595 | 1.99E-12  | 2.30E-10 | 75.5404  | 1      | P-0.3PG-E8- | E8 blank    | 38765.77 | Protein FAM50B OS=Homo sapiens OX=9606 GN=FAM50B PE=1 SV=1                                             |
| P23246     | 3 | 1 | 22.7121 | 1.77E-08  | 7.17E-08 | 3.03323  | 1      | P-0.3PG-E8- | E8 blank    | 76263.6  | Splicing factor_ proline- and glutamine-rich OS=Homo sapiens OX=9606 GN=SFPQ PE=1 SV=2                 |
| Q5T0T0     | 2 | 1 | 14.8592 | 8.45E-06  | 1.28E-05 | 3.0897   | 1      | E8 blank    | P-0.3PG-E8- | 33877.4  | E3 ubiquitin-protein ligase MARCHF8 OS=Homo sapiens OX=9606 GN=MARCHF8 PE=1 SV=1                       |
| A0A2R8Y6F  | 2 | 1 | 16.9744 | 2.06E-05  | 2.95E-05 | 1.25949  | 1      | P-0.3PG-E8- | E8 blank    | 177570.8 | HECT-type E3 ubiquitin transferase OS=Homo sapiens OX=9606 GN=HECW2 PE=1 SV=1                          |
| A0A2R8Y4T  | 2 | 1 | 14.5546 | 0.0068327 | 0.007436 | 1.1199   | 0.9373 | P-0.3PG-E8- | E8 blank    | 201147.7 | Tensin-1 OS=Homo sapiens OX=9606 GN=TNS1 PE=1 SV=1                                                     |



|            |   |   |         |           |          |          |        |             |             |          |                                                                                                                                     |
|------------|---|---|---------|-----------|----------|----------|--------|-------------|-------------|----------|-------------------------------------------------------------------------------------------------------------------------------------|
| Q6ZN06     | 2 | 1 | 18.5992 | 7.75E-05  | 0.000102 | 2.51561  | 1      | E8 blank    | P-0.3PG-E8- | 73887.67 | Zinc finger protein 813 OS=Homo sapiens OX=9606 GN=ZNF813 PE=2 SV=2                                                                 |
| A0A7I2V49  | 2 | 1 | 7.2158  | 5.70E-10  | 7.17E-09 | 24.7042  | 1      | P-0.3PG-E8- | E8 blank    | 189706.5 | DNA (cytosine-5)-methyltransferase OS=Homo sapiens OX=9606 GN=DNMT1 PE=1 SV=1                                                       |
| Q8WVE0     | 2 | 1 | 18.7245 | 5.72E-07  | 1.15E-06 | 27.4014  | 1      | F-0.3PG-E8- | E8 blank    | 24904.81 | EEF1A lysine methyltransferase 1 OS=Homo sapiens OX=9606 GN=EEF1AKMT1 PE=1 SV=1                                                     |
| Q9Y2J2     | 3 | 1 | 12.0064 | 0.0007905 | 0.000926 | 3.08095  | 0.9995 | F-0.3PG-E8- | P-0.3PG-E8- | 121533.2 | Band 4.1-like protein 3 OS=Homo sapiens OX=9606 GN=EPB41L3 PE=1 SV=2                                                                |
| A0A087WY   | 3 | 1 | 19.3497 | 0.1446975 | 0.147928 | 5.60637  | 0.3493 | F-0.3PG-E8- | E8 blank    | 98176.24 | Zinc finger protein 107 OS=Homo sapiens OX=9606 GN=ZNF107 PE=1 SV=1                                                                 |
| E9PK83;P25 | 2 | 1 | 15.956  | 0.0003348 | 0.000408 | 1.42429  | 1      | E8 blank    | P-0.3PG-E8- | 17467.88 | Rhombotin-1 OS=Homo sapiens OX=9606 GN=LMO1 PE=1 SV=1                                                                               |
| C9JU31     | 2 | 1 | 8.3806  | 3.54E-06  | 5.85E-06 | 3.32429  | 1      | E8 blank    | P-0.3PG-E8- | 51084.03 | Coiled-coil domain-containing protein 136 OS=Homo sapiens OX=9606 GN=CCDC136 PE=1 SV=1                                              |
| A0A7I2V44  | 1 | 1 | 4.5681  | 1.47E-11  | 8.49E-10 | Infinity | 1      | E8 blank    | P-0.3PG-E8- | 34105.28 | Kielin/chordin-like protein (Fragment) OS=Homo sapiens OX=9606 GN=KCP PE=1 SV=1                                                     |
| Q9BZM3     | 1 | 1 | 9.131   | 7.50E-08  | 2.25E-07 | 2.8227   | 1      | E8 blank    | P-0.3PG-E8- | 32544.33 | GS homeobox 2 OS=Homo sapiens OX=9606 GN=GSX2 PE=1 SV=2                                                                             |
| Q5SW98     | 1 | 1 | 11.3816 | 2.64E-09  | 1.83E-08 | 9.90662  | 1      | P-0.3PG-E8- | E8 blank    | 14477.95 | Phosphatidylinositol 4-phosphate 3-kinase C2 domain-containing subunit beta (Fragment) OS=Homo sapiens OX=9606 GN=PI3K2C2 PE=1 SV=1 |
| C9J186;M0  | 1 | 1 | 11.028  | 1.02E-07  | 2.91E-07 | 46.5353  | 1      | E8 blank    | P-0.3PG-E8- | 18775.69 | Dermokine OS=Homo sapiens OX=9606 GN=DMKN PE=1 SV=1                                                                                 |
| E5RG86;E5  | 1 | 1 | 11.1114 | 4.26E-11  | 1.40E-09 | 57.4972  | 1      | P-0.3PG-E8- | E8 blank    | 7175.22  | Focal adhesion kinase 1 (Fragment) OS=Homo sapiens OX=9606 GN=PTK2 PE=1 SV=1                                                        |
| Q8N5R6;A0  | 2 | 1 | 11.4551 | 3.31E-05  | 4.58E-05 | 8.70734  | 1      | P-0.3PG-E8- | E8 blank    | 107615.2 | Coiled-coil domain-containing protein 33 OS=Homo sapiens OX=9606 GN=CCDC33 PE=1 SV=3                                                |
| A0A590UJC  | 1 | 1 | 11.8644 | 1.70E-06  | 2.99E-06 | 6.6933   | 1      | E8 blank    | F-0.3PG-E8- | 86034    | 85/88 kDa calcium-independent phospholipase A2 OS=Homo sapiens OX=9606 GN=PLA2G6 PE=1 SV=1                                          |
| Q9HCL3     | 1 | 1 | 4.6741  | 8.71E-07  | 1.66E-06 | 1.71837  | 1      | E8 blank    | P-0.3PG-E8- | 65231.2  | Zinc finger protein 14 homolog OS=Homo sapiens OX=9606 GN=ZFP14 PE=1 SV=2                                                           |
| A0A087WZ   | 1 | 1 | 10.2996 | 4.85E-09  | 2.93E-08 | 19.0118  | 1      | P-0.3PG-E8- | E8 blank    | 32899.75 | Ribonuclease H2 subunit B OS=Homo sapiens OX=9606 GN=RNASEH2B PE=1 SV=2                                                             |
| Q3LI72     | 1 | 1 | 14.1438 | 2.34E-05  | 3.32E-05 | 17.3843  | 1      | F-0.3PG-E8- | E8 blank    | 7852.332 | Keratin-associated protein 19-5 OS=Homo sapiens OX=9606 GN=KRTAP19-5 PE=1 SV=1                                                      |
| P03915     | 1 | 1 | 11.6266 | 3.38E-07  | 7.39E-07 | 15.1749  | 1      | P-0.3PG-E8- | E8 blank    | 67368.86 | NADH-ubiquinone oxidoreductase chain 5 OS=Homo sapiens OX=9606 GN=MT-ND5 PE=1 SV=2                                                  |
| K7EQT8     | 1 | 1 | 10.495  | 1.41E-07  | 3.58E-07 | 2.15397  | 1      | E8 blank    | P-0.3PG-E8- | 14264.82 | HAUS augmin-like complex subunit 1 OS=Homo sapiens OX=9606 GN=HAUS1 PE=1 SV=1                                                       |
| D7R525;J3K | 1 | 1 | 11.9846 | 7.26E-11  | 1.86E-09 | 719.453  | 1      | P-0.3PG-E8- | E8 blank    | 24960.04 | Mitogen-activated protein kinase OS=Homo sapiens OX=9606 GN=MAPK9 PE=1 SV=1                                                         |
| P23497     | 1 | 1 | 9.6558  | 6.26E-10  | 7.17E-09 | 33.1388  | 1      | F-0.3PG-E8- | E8 blank    | 101557.3 | Nuclear autoantigen Sp-100 OS=Homo sapiens OX=9606 GN=SP100 PE=1 SV=3                                                               |
| Q16760     | 1 | 1 | 0       | 8.30E-08  | 2.43E-07 | 74.8899  | 1      | E8 blank    | P-0.3PG-E8- | 136692.8 | Diacylglycerol kinase delta OS=Homo sapiens OX=9606 GN=DGKD PE=1 SV=4                                                               |
| A0A286YF1  | 1 | 1 | 4.9594  | 1.39E-09  | 1.26E-08 | 117.477  | 1      | P-0.3PG-E8- | E8 blank    | 62570.75 | Methylenetetrahydrofolate reductase OS=Homo sapiens OX=9606 GN=MTHFR PE=1 SV=1                                                      |
| Q14C86     | 1 | 1 | 10.335  | 7.38E-05  | 9.79E-05 | 1.42507  | 1      | F-0.3PG-E8- | P-0.3PG-E8- | 166462.9 | GTPase-activating protein and VPS9 domain-containing protein 1 OS=Homo sapiens OX=9606 GN=GAPVD1 PE=1 SV=1                          |
| Q9UMW8     | 1 | 1 | 11.5444 | 1.27E-08  | 5.64E-08 | 26.2389  | 1      | P-0.3PG-E8- | E8 blank    | 44037.36 | Ubl carboxyl-terminal hydrolase 18 OS=Homo sapiens OX=9606 GN=USP18 PE=1 SV=1                                                       |
| H0YBZ9     | 1 | 1 | 6.0802  | 4.69E-09  | 2.93E-08 | 3.48346  | 1      | F-0.3PG-E8- | E8 blank    | 8590.412 | Survival motor neuron protein (Fragment) OS=Homo sapiens OX=9606 GN=SMN2 PE=1 SV=1                                                  |
| H0YFS2     | 1 | 1 | 10.9761 | 0.0022031 | 0.00247  | 234.572  | 0.992  | P-0.3PG-E8- | E8 blank    | 26161.72 | 4F2 cell-surface antigen heavy chain (Fragment) OS=Homo sapiens OX=9606 GN=SLC3A2 PE=1 SV=1                                         |
| P31273     | 1 | 1 | 11.2994 | 2.39E-09  | 1.70E-08 | 49.2782  | 1      | F-0.3PG-E8- | E8 blank    | 27982.67 | Homeobox protein Hox-C8 OS=Homo sapiens OX=9606 GN=HOXC8 PE=1 SV=2                                                                  |
| P55259     | 1 | 1 | 9.0368  | 2.15E-12  | 2.30E-10 | 250.94   | 1      | P-0.3PG-E8- | E8 blank    | 61134.38 | Pancreatic secretory granule membrane major glycoprotein GP2 OS=Homo sapiens OX=9606 GN=GP2 PE=1 SV=1                               |
| Q7L3T8     | 1 | 1 | 5.5136  | 0.0001013 | 0.000131 | 3.75866  | 1      | E8 blank    | P-0.3PG-E8- | 54289.26 | Probable proline--tRNA ligase_ mitochondrial OS=Homo sapiens OX=9606 GN=PARS2 PE=1 SV=1                                             |
| A0A1W2PP   | 1 | 1 | 5.0318  | 2.55E-11  | 1.09E-09 | 24.0634  | 1      | P-0.3PG-E8- | E8 blank    | 21097.95 | Uncharacterized protein KIAA1614 (Fragment) OS=Homo sapiens OX=9606 GN=KIAA1614 PE=1 SV=1                                           |
| Q8WX93     | 2 | 1 | 7.704   | 1.03E-06  | 1.92E-06 | 53.3239  | 1      | P-0.3PG-E8- | E8 blank    | 151932.7 | Palladin OS=Homo sapiens OX=9606 GN=PALLD PE=1 SV=3                                                                                 |
| I6L8A6;Q99 | 2 | 1 | 10.1162 | 0.0005968 | 0.000708 | 3.27071  | 0.9998 | P-0.3PG-E8- | E8 blank    | 103922.5 | CtBP-interacting protein OS=Homo sapiens OX=9606 GN=RBBP8 PE=1 SV=1                                                                 |
| Q14681     | 1 | 1 | 11.7198 | 2.20E-10  | 4.00E-09 | 8.24483  | 1      | E8 blank    | P-0.3PG-E8- | 28812.24 | BTB/POZ domain-containing protein KCTD2 OS=Homo sapiens OX=9606 GN=KCTD2 PE=1 SV=3                                                  |
| F8VU08;Q0  | 1 | 1 | 6.5138  | 1.73E-05  | 2.51E-05 | 2.83326  | 1      | E8 blank    | P-0.3PG-E8- | 11367.14 | Hematopoietically-expressed homeobox protein HHEX OS=Homo sapiens OX=9606 GN=HHEX PE=1 SV=1                                         |
| G3V2Q1;P0  | 1 | 1 | 10.709  | 1.43E-11  | 8.49E-10 | 6.67637  | 1      | P-0.3PG-E8- | E8 blank    | 33627.96 | Heterogeneous nuclear ribonucleoproteins C1/C2 OS=Homo sapiens OX=9606 GN=HNRNPC PE=1 SV=1                                          |
| P09871     | 1 | 1 | 10.1112 | 7.72E-10  | 8.11E-09 | 15.9881  | 1      | P-0.3PG-E8- | E8 blank    | 78224.29 | Complement C1s subcomponent OS=Homo sapiens OX=9606 GN=C1S PE=1 SV=1                                                                |
| E9PBE1;Q0  | 1 | 1 | 5.2057  | 3.86E-08  | 1.30E-07 | 3.71396  | 1      | P-0.3PG-E8- | E8 blank    | 39814.18 | Protein kinase C zeta type OS=Homo sapiens OX=9606 GN=PRKCZ PE=1 SV=1                                                               |
| K7ELH4;K7E | 1 | 1 | 11.979  | 1.88E-11  | 8.59E-10 | 45.1736  | 1      | P-0.3PG-E8- | E8 blank    | 4409.936 | Intercellular adhesion molecule 3 (Fragment) OS=Homo sapiens OX=9606 GN=ICAM3 PE=1 SV=1                                             |
| A0A1B0GTI  | 1 | 1 | 4.9309  | 3.69E-09  | 2.44E-08 | 12.5009  | 1      | E8 blank    | P-0.3PG-E8- | 248764.8 | Voltage-dependent L-type calcium channel subunit alpha OS=Homo sapiens OX=9606 GN=CACNA1D PE=1 SV=1                                 |
| H0Y3M0;H0  | 1 | 1 | 10.5586 | 7.05E-08  | 2.14E-07 | 8.93574  | 1      | P-0.3PG-E8- | E8 blank    | 12707.79 | Phosducin-like protein (Fragment) OS=Homo sapiens OX=9606 GN=PDCL PE=1 SV=1                                                         |
| Q12767     | 1 | 1 | 10.224  | 1.63E-09  | 1.39E-08 | 25.5184  | 1      | P-0.3PG-E8- | E8 blank    | 153717.4 | Transmembrane protein 94 OS=Homo sapiens OX=9606 GN=TMEM94 PE=1 SV=1                                                                |
| Q92628;D6  | 2 | 1 | 9.8827  | 0.0001613 | 0.000203 | 71.007   | 1      | P-0.3PG-E8- | E8 blank    | 157127.2 | Uncharacterized protein KIAA0232 OS=Homo sapiens OX=9606 GN=KIAA0232 PE=1 SV=5                                                      |
| Q38SD2     | 2 | 1 | 8.5083  | 2.10E-09  | 1.59E-08 | Infinity | 1      | P-0.3PG-E8- | E8 blank    | 228529.7 | Leucine-rich repeat serine/threonine-protein kinase 1 OS=Homo sapiens OX=9606 GN=LRRK1 PE=1 SV=3                                    |
| Q13103     | 2 | 1 | 10.4025 | 3.37E-05  | 4.64E-05 | 2.60774  | 1      | F-0.3PG-E8- | P-0.3PG-E8- | 24622.87 | Secreted phosphoprotein 24 OS=Homo sapiens OX=9606 GN=SPP2 PE=1 SV=1                                                                |
| A0A1P0B7I  | 1 | 1 | 14.0712 | 4.57E-07  | 9.49E-07 | 3.02092  | 1      | P-0.3PG-E8- | E8 blank    | 48839.26 | Mitogen-activated protein kinase OS=Homo sapiens OX=9606 GN=MAPK10 PE=1 SV=3                                                        |
| Q8N567     | 1 | 0 | 5.5075  |           |          |          |        | ---         | ---         | 31161.38 | Zinc finger CCHC domain-containing protein 9 OS=Homo sapiens OX=9606 GN=ZCCHC9 PE=1 SV=2                                            |
| F8WCT0     | 1 | 0 | 5.9008  |           |          |          |        | ---         | ---         | 3965.473 | RNA-binding protein 6 OS=Homo sapiens OX=9606 GN=RBM6 PE=4 SV=1                                                                     |
| MOQXV1     | 1 | 0 | 6.1018  |           |          |          |        | ---         | ---         | 16702.41 | Inactive serine/threonine-protein kinase VRK3 (Fragment) OS=Homo sapiens OX=9606 GN=VRK3 PE=1 SV=1                                  |
| A0A087WV   | 2 | 0 | 10.5959 |           |          |          |        | ---         | ---         | 10894.76 | Latent-transforming growth factor beta-binding protein 4 (Fragment) OS=Homo sapiens OX=9606 GN=LTBP4 PE=1 SV=1                      |

|            |   |   |         |  |  |  |  |     |     |          |                                                                                                        |
|------------|---|---|---------|--|--|--|--|-----|-----|----------|--------------------------------------------------------------------------------------------------------|
| Q9NPI1     | 1 | 0 | 4.3639  |  |  |  |  | --- | --- | 74594.92 | Bromodomain-containing protein 7 OS=Homo sapiens OX=9606 GN=BRD7 PE=1 SV=1                             |
| Q99453     | 1 | 0 | 5.1642  |  |  |  |  | --- | --- | 31906.15 | Paired mesoderm homeobox protein 2B OS=Homo sapiens OX=9606 GN=PHOX2B PE=2 SV=2                        |
| A0A590UK0  | 3 | 0 | 17.8508 |  |  |  |  | --- | --- | 125660.9 | AP-3 complex subunit beta OS=Homo sapiens OX=9606 GN=AP3B2 PE=1 SV=1                                   |
| Q8NEM1;E   | 3 | 0 | 24.0342 |  |  |  |  | --- | --- | 63679.94 | Zinc finger protein 680 OS=Homo sapiens OX=9606 GN=ZNF680 PE=1 SV=2                                    |
| Q8TAK5     | 1 | 0 | 10.6546 |  |  |  |  | --- | --- | 48649.67 | GA-binding protein subunit beta-2 OS=Homo sapiens OX=9606 GN=GABPB2 PE=1 SV=1                          |
| Q9ULH7     | 1 | 0 | 5.301   |  |  |  |  | --- | --- | 118355.4 | Myocardin-related transcription factor B OS=Homo sapiens OX=9606 GN=MRTFB PE=1 SV=3                    |
| Q92834;A0  | 5 | 0 | 18.8813 |  |  |  |  | --- | --- | 114413.4 | X-linked retinitis pigmentosa GTPase regulator OS=Homo sapiens OX=9606 GN=RPGR PE=1 SV=2               |
| Q92625     | 1 | 0 | 7.3746  |  |  |  |  | --- | --- | 124077.5 | Ankyrin repeat and SAM domain-containing protein 1A OS=Homo sapiens OX=9606 GN=ANKS1A PE=1 SV=4        |
| E7EWZ1;P1  | 1 | 0 | 4.8394  |  |  |  |  | --- | --- | 47464.46 | Myb-related protein A OS=Homo sapiens OX=9606 GN=MYBL1 PE=1 SV=1                                       |
| A0A7I2V44  | 1 | 0 | 4.8206  |  |  |  |  | --- | --- | 40671.21 | Cathepsin B OS=Homo sapiens OX=9606 GN=CTSB PE=1 SV=1                                                  |
| K7ESF4;Q9  | 1 | 0 | 5.1502  |  |  |  |  | --- | --- | 23184.77 | Glucose-6-phosphate isomerase (Fragment) OS=Homo sapiens OX=9606 PE=4 SV=1                             |
| P35908;H0  | 4 | 0 | 26.2697 |  |  |  |  | --- | --- | 65718.1  | Keratin_ type II cytoskeletal 2 epidermal OS=Homo sapiens OX=9606 GN=KRT2 PE=1 SV=2                    |
| E9PSA5;H0  | 1 | 0 | 11.8666 |  |  |  |  | --- | --- | 26170.52 | Alpha-ketoglutarate-dependent dioxygenase alkB homolog 3 (Fragment) OS=Homo sapiens OX=9606 GN=ALKB    |
| B1AKL4;Q9  | 1 | 0 | 5.4562  |  |  |  |  | --- | --- | 105892.1 | Eukaryotic translation initiation factor 4E transporter OS=Homo sapiens OX=9606 GN=EIF4ENIF1 PE=1 SV=1 |
| Q13367;A0  | 3 | 0 | 13.9849 |  |  |  |  | --- | --- | 119686.8 | AP-3 complex subunit beta-2 OS=Homo sapiens OX=9606 GN=AP3B2 PE=1 SV=2                                 |
| A0A1W2PC   | 1 | 0 | 12.7832 |  |  |  |  | --- | --- | 54484.93 | Squalene synthase OS=Homo sapiens OX=9606 GN=FDFT1 PE=1 SV=1                                           |
| A0A087WT   | 1 | 0 | 5.5721  |  |  |  |  | --- | --- | 20476.03 | Oxysterol-binding protein-related protein 2 (Fragment) OS=Homo sapiens OX=9606 GN=OSBPL2 PE=1 SV=1     |
| O60765     | 1 | 0 | 4.927   |  |  |  |  | --- | --- | 71061.74 | Zinc finger protein 354A OS=Homo sapiens OX=9606 GN=ZNF354A PE=1 SV=2                                  |
| G3V2N3;P5  | 1 | 0 | 6.1126  |  |  |  |  | --- | --- | 22557.11 | Paired mesoderm homeobox protein 1 OS=Homo sapiens OX=9606 GN=PRRX1 PE=1 SV=1                          |
| Q9UJW2     | 1 | 0 | 5.2686  |  |  |  |  | --- | --- | 55973.24 | Tubulointerstitial nephritis antigen OS=Homo sapiens OX=9606 GN=TINAG PE=2 SV=3                        |
| Q9Y2K1     | 1 | 0 | 5.0767  |  |  |  |  | --- | --- | 84069.2  | Zinc finger and BTB domain-containing protein 1 OS=Homo sapiens OX=9606 GN=ZBTB1 PE=1 SV=3             |
| P04259;P0  | 3 | 0 | 20.8708 |  |  |  |  | --- | --- | 60352.17 | Keratin_ type II cytoskeletal 6B OS=Homo sapiens OX=9606 GN=KRT6B PE=1 SV=5                            |
| P38159     | 2 | 0 | 9.5021  |  |  |  |  | --- | --- | 42331.91 | RNA-binding motif protein_ X chromosome OS=Homo sapiens OX=9606 GN=RBMX PE=1 SV=3                      |
| H0Y9M1     | 1 | 0 | 12.2202 |  |  |  |  | --- | --- | 27850.45 | Spermatogenesis-associated protein 20 (Fragment) OS=Homo sapiens OX=9606 GN=SPATA20 PE=1 SV=1          |
| Q96BN6     | 1 | 0 | 13.4766 |  |  |  |  | --- | --- | 65131.53 | Primary cilium assembly protein FAM149B1 OS=Homo sapiens OX=9606 GN=FAM149B1 PE=1 SV=2                 |
| H0Y4M6;H   | 2 | 0 | 16.6718 |  |  |  |  | --- | --- | 36010.6  | Guanine nucleotide exchange factor DBS (Fragment) OS=Homo sapiens OX=9606 GN=MCF2L PE=1 SV=1           |
| H0YDV1     | 1 | 0 | 5.9567  |  |  |  |  | --- | --- | 5765.462 | Zinc finger protein 195 (Fragment) OS=Homo sapiens OX=9606 GN=ZNF195 PE=1 SV=1                         |
| C9J0A5;C9J | 1 | 0 | 4.3241  |  |  |  |  | --- | --- | 16392.3  | E3 ubiquitin protein ligase (Fragment) OS=Homo sapiens OX=9606 GN=RNF20 PE=1 SV=1                      |
| Q86W92     | 1 | 0 | 4.0217  |  |  |  |  | --- | --- | 114594.6 | Liprin-beta-1 OS=Homo sapiens OX=9606 GN=PPFIBP1 PE=1 SV=2                                             |
| Q8IUB9     | 1 | 0 | 5.1447  |  |  |  |  | --- | --- | 9406.862 | Keratin-associated protein 19-1 OS=Homo sapiens OX=9606 GN=KRTAP19-1 PE=1 SV=2                         |
| F5H5B4;Q1  | 1 | 0 | 13.7346 |  |  |  |  | --- | --- | 49770.36 | Non-specific serine/threonine protein kinase OS=Homo sapiens OX=9606 GN=STK4 PE=1 SV=1                 |
| G3V2J9     | 1 | 0 | 11.039  |  |  |  |  | --- | --- | 145198.9 | Tubulin polyglutamylase TTLL5 OS=Homo sapiens OX=9606 GN=TTLL5 PE=1 SV=1                               |
| H7C0P3     | 2 | 0 | 10.6955 |  |  |  |  | --- | --- | 16449.93 | Nuclear receptor corepressor 2 (Fragment) OS=Homo sapiens OX=9606 GN=NCOR2 PE=1 SV=1                   |
| P48960     | 1 | 0 | 4.2585  |  |  |  |  | --- | --- | 94663.74 | Adhesion G protein-coupled receptor E5 OS=Homo sapiens OX=9606 GN=ADGRE5 PE=1 SV=4                     |
| Q96PM5     | 2 | 0 | 9.9168  |  |  |  |  | --- | --- | 31764.25 | RING finger and CHY zinc finger domain-containing protein 1 OS=Homo sapiens OX=9606 GN=RCHY1 PE=1 SV=  |
| D6W5U7;Q   | 1 | 0 | 8.5172  |  |  |  |  | --- | --- | 140432.5 | Cohesin subunit SA-3 OS=Homo sapiens OX=9606 GN=STAG3 PE=1 SV=1                                        |
| M0R297;Q   | 1 | 0 | 5.451   |  |  |  |  | --- | --- | 17183.23 | Zinc finger protein 677 (Fragment) OS=Homo sapiens OX=9606 GN=ZNF677 PE=1 SV=1                         |
| P55000     | 1 | 0 | 10.812  |  |  |  |  | --- | --- | 11813.27 | Secreted Ly-6/uPAR-related protein 1 OS=Homo sapiens OX=9606 GN=SLURP1 PE=1 SV=2                       |
| A6PWM2;C   | 1 | 0 | 5.76    |  |  |  |  | --- | --- | 26384.14 | Protein disulfide isomerase CRELD2 (Fragment) OS=Homo sapiens OX=9606 GN=CRELD2 PE=1 SV=1              |
| A0A087X2F  | 1 | 0 | 11.9152 |  |  |  |  | --- | --- | 5913.826 | Adenomatous polyposis coli protein (Fragment) OS=Homo sapiens OX=9606 GN=APC PE=4 SV=1                 |
| Q9BUQ8     | 1 | 0 | 10.1872 |  |  |  |  | --- | --- | 95924.82 | Probable ATP-dependent RNA helicase DDX23 OS=Homo sapiens OX=9606 GN=DDX23 PE=1 SV=3                   |
| Q9UBS5     | 2 | 0 | 8.7919  |  |  |  |  | --- | --- | 109404   | Gamma-aminobutyric acid type B receptor subunit 1 OS=Homo sapiens OX=9606 GN=GABBR1 PE=1 SV=1          |
| A0A7I2V2X  | 1 | 0 | 12.7934 |  |  |  |  | --- | --- | 57929.96 | 60 kDa chaperonin OS=Homo sapiens OX=9606 GN=HSPD1 PE=1 SV=1                                           |
| B4E2Q0;H0  | 1 | 0 | 4.9915  |  |  |  |  | --- | --- | 105853.8 | Calcium-transporting ATPase OS=Homo sapiens OX=9606 GN=ATP2C1 PE=1 SV=1                                |
| C9J102;C9J | 1 | 0 | 14.2568 |  |  |  |  | --- | --- | 15538.11 | Histone deacetylase (Fragment) OS=Homo sapiens OX=9606 GN=HDAC7 PE=1 SV=1                              |
| F8VWZ5     | 1 | 0 | 13.1262 |  |  |  |  | --- | --- | 16980.93 | H2.0-like homeobox protein (Fragment) OS=Homo sapiens OX=9606 GN=HLX PE=1 SV=1                         |
| Q99593     | 1 | 0 | 11.1198 |  |  |  |  | --- | --- | 58224.23 | T-box transcription factor TBX5 OS=Homo sapiens OX=9606 GN=TBX5 PE=1 SV=2                              |
| Q9BRV8     | 1 | 0 | 10.2498 |  |  |  |  | --- | --- | 23892.13 | Suppressor of IKBKE 1 OS=Homo sapiens OX=9606 GN=SIKE1 PE=1 SV=1                                       |
| A0A0C4DG   | 1 | 0 | 10.1976 |  |  |  |  | --- | --- | 14315.24 | Prolyl hydroxylase EGLN2 OS=Homo sapiens OX=9606 GN=EGLN2 PE=1 SV=1                                    |
| A2A2D0;P1  | 1 | 0 | 13.2326 |  |  |  |  | --- | --- | 9793.226 | Stathmin (Fragment) OS=Homo sapiens OX=9606 GN=STMN1 PE=1 SV=8                                         |



|           |   |   |         |  |  |  |  |     |     |          |                                                                                                      |
|-----------|---|---|---------|--|--|--|--|-----|-----|----------|------------------------------------------------------------------------------------------------------|
| E9PRV7;P2 | 1 | 0 | 6.4642  |  |  |  |  | --- | --- | 47221.43 | G protein-coupled receptor kinase OS=Homo sapiens OX=9606 GN=GRK2 PE=1 SV=1                          |
| Q13615    | 1 | 0 | 4.5881  |  |  |  |  | --- | --- | 136242.3 | Myotubularin-related protein 3 OS=Homo sapiens OX=9606 GN=MTMR3 PE=1 SV=3                            |
| A0A494C0J | 1 | 0 | 5.9524  |  |  |  |  | --- | --- | 60908.46 | Zinc finger protein 136 OS=Homo sapiens OX=9606 GN=ZNF136 PE=1 SV=1                                  |
| H7BXE3    | 1 | 0 | 5.1165  |  |  |  |  | --- | --- | 49076.26 | SAFB-like transcription modulator (Fragment) OS=Homo sapiens OX=9606 GN=SLTM PE=1 SV=1               |
| A0A2U3TZI | 1 | 0 | 12.346  |  |  |  |  | --- | --- | 29513.92 | Uncharacterized LOC112694756 OS=Homo sapiens OX=9606 GN=LOC112694756 PE=4 SV=1                       |
| A6NJL1    | 1 | 0 | 8.251   |  |  |  |  | --- | --- | 56681.41 | Zinc finger and SCAN domain-containing protein 5B OS=Homo sapiens OX=9606 GN=ZSCAN5B PE=1 SV=1       |
| A0A1B0GU  | 1 | 0 | 13.0756 |  |  |  |  | --- | --- | 13329.43 | Proline-rich transmembrane protein 2 OS=Homo sapiens OX=9606 GN=PRRT2 PE=4 SV=1                      |
| Q9HCR9    | 1 | 0 | 4.7606  |  |  |  |  | --- | --- | 105892.4 | Dual 3'_5'-cyclic-AMP and -GMP phosphodiesterase 11A OS=Homo sapiens OX=9606 GN=PDE11A PE=1 SV=2     |
| Q16832;Q5 | 1 | 0 | 5.4754  |  |  |  |  | --- | --- | 97648.94 | Discoidin domain-containing receptor 2 OS=Homo sapiens OX=9606 GN=DDR2 PE=1 SV=2                     |
| H0Y3V3    | 1 | 0 | 4.9618  |  |  |  |  | --- | --- | 52939.03 | Adhesion G protein-coupled receptor L2 (Fragment) OS=Homo sapiens OX=9606 GN=ADGRL2 PE=1 SV=1        |
| H0YMX5;O  | 1 | 0 | 5.0829  |  |  |  |  | --- | --- | 17370.03 | Homeobox protein Meis2 (Fragment) OS=Homo sapiens OX=9606 GN=MEIS2 PE=1 SV=2                         |
| R4GMU5    | 1 | 0 | 4.5664  |  |  |  |  | --- | --- | 6397.702 | Dipeptidyl peptidase 2 (Fragment) OS=Homo sapiens OX=9606 GN=DPP7 PE=1 SV=1                          |
| Q10570    | 1 | 0 | 4.7486  |  |  |  |  | --- | --- | 162138.7 | Cleavage and polyadenylation specificity factor subunit 1 OS=Homo sapiens OX=9606 GN=CPSF1 PE=1 SV=2 |
| Q8N9K5    | 1 | 0 | 4.5127  |  |  |  |  | --- | --- | 64326.94 | Zinc finger protein 565 OS=Homo sapiens OX=9606 GN=ZNF565 PE=2 SV=2                                  |
| A0A0B4J23 | 1 | 0 | 16.4016 |  |  |  |  | --- | --- | 23492.52 | Immunoglobulin lambda-like polypeptide 5 OS=Homo sapiens OX=9606 GN=IGLL5 PE=1 SV=1                  |
