# Supplementary material for: Unlocking the Potential of Human-Induced Pluripotent Stem Cells: Cellular Responses and Secretome Profiles in Peptide Hydrogel 3D Culture
Source: MDPI journal article supplement (doi:10.3390/cells13020143), 2024-01-12

## **Supplementary Figures**

### **Unlocking the Potential of Human-Induced Pluripotent Stem Cells: Cellular Responses and Secretome Profiles in Peptide Hydrogel 3D Culture**

Muyun Cui<sup>1</sup>, Wei Wu<sup>2,†</sup>, Quan Li<sup>3,†</sup>, Guangyan Qi<sup>1</sup>, Xuming Liu<sup>4</sup>, Jianfa Bai<sup>5</sup>, Mingshun Chen<sup>4</sup>,  
Ping Li<sup>2</sup>, Xiuzhi (Susan) Sun<sup>1,3,\*</sup>

#### **Author affiliations:**

1 Department of Grain Science and Industry, Kansas State University, Manhattan, KS 66506, USA

2 Department of Chemistry, Kansas State University, Manhattan, KS 66506, USA

3 Carl and Melinda Helwig Department of Biological and Agricultural Engineering, Kansas State University, Manhattan, KS 66506, USA

4 Department of Entomology, Kansas State University, KS, 66506, USA

5 Department of Diagnostic Medicine/Pathobiology, College of Veterinary Medicine, Kansas State University, Manhattan, KS 66506, USA

**† Authors with equal contributions as the second author.**

**\*Corresponding authors: [xss@ksu.edu](mailto:xss@ksu.edu)**



**Supplemental Figure S2.** Different visualization method for GO analysis based on the mass spectrometry results of medium collected from hiPSC-P and hiPSC-F cultured in E8 based system, showing the target gene categories and count.

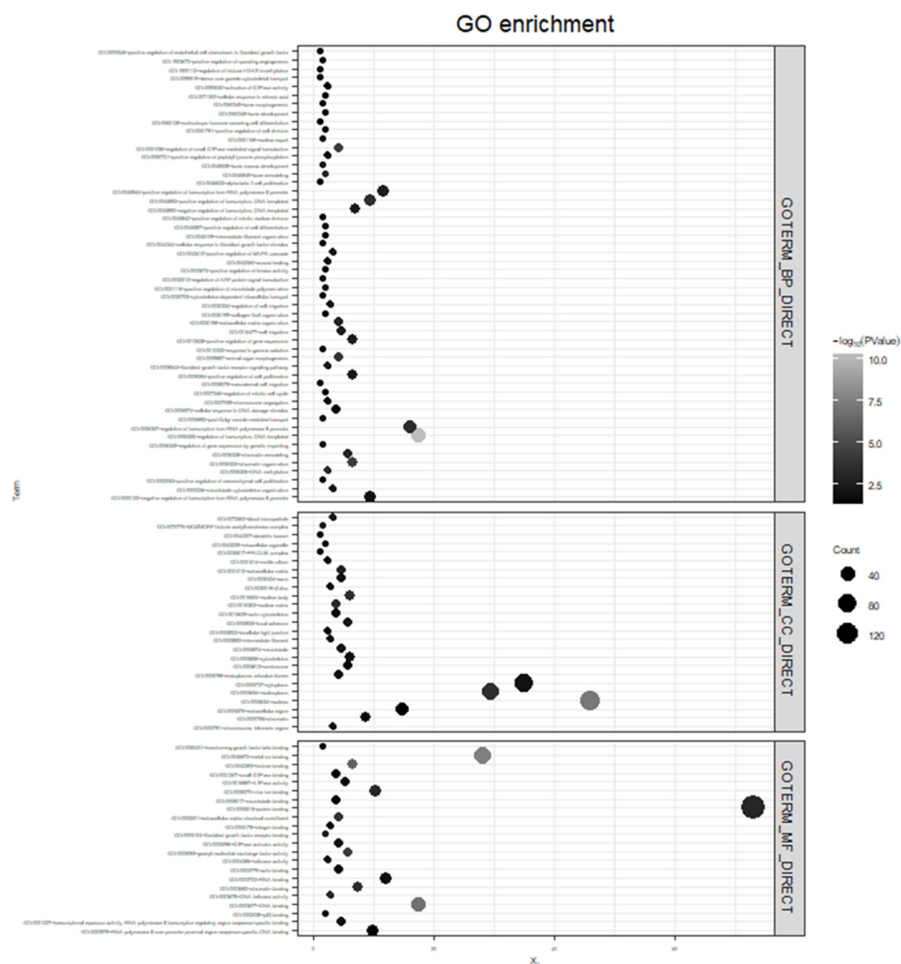

Supplement: s1 [file s1]
